# Supplementary material
Source: Royal Society of Chemistry journal article supplement (doi:10.1039/d6ob00350h)

## Supporting Information

# Metal-free electrochemical decarboxylative cyclization of *N*-aryl glycines with azobenzenes

Wenji Zhu, Xuyuan He, Yujun Gao, Mengqi Liu, Jincheng Ye and Shulin Ning<sup>\*a</sup>

<sup>a</sup>School of Chemical Engineering, Changchun University of Technology, Changchun, 130012, P. R. China.

[\\*Correspondence to: ningshulin@ccut.edu.cn](mailto:ningshulin@ccut.edu.cn)

### Table of Contents

|                                                                        |           |
|------------------------------------------------------------------------|-----------|
| <b>I. General Information .....</b>                                    | <b>2</b>  |
| <b>II. Substrates Synthesis and Characterization.....</b>              | <b>3</b>  |
| <b>III. Investigation of Reaction Conditions .....</b>                 | <b>13</b> |
| <b>IV. Experimental Procedures and Compound Characterization .....</b> | <b>16</b> |
| <b>V. Mechanism Research .....</b>                                     | <b>38</b> |
| <b>VI. References .....</b>                                            | <b>40</b> |
| <b>VII. Spectra .....</b>                                              | <b>42</b> |

## I. General Information

All reactions were performed under air atmosphere, using round bottom flasks. All substrates were obtained from the commercial sources or synthesized following literature procedures. All reagents were commercial and were used without further purification. The electrochemical reaction device follows our previous work.<sup>1</sup> The instrument for electrolysis is Single Output DC Power Supply (KRP-305DM) (made in China). Chromatography was carried on flash silica gel (200-300 mesh). All reactions were monitored by TLC, which was performed on percolated aluminum sheets of silica gel 60 (F254). Melting points were uncorrected. The <sup>1</sup>H and <sup>13</sup>C NMR data were obtained on a 400 MHz NMR spectrometer with TMS as the internal standard and CDCl<sub>3</sub> as solvent. Multiplicities are indicated as it follows: s, singlet; d, doublet; t, triplet; q, quartet; m, multiplet; dd, doubled doublet; br, broad. Coupling constants (*J* values) where noted are quoted in Hertz. High-resolution mass spectra (HRMS) were obtained with a time-of-flight (TOF) mass spectrometer (ESI).

### *Electrode materials/dimensions:*

The graphite electrode and platinum electrode are purchased from Zhongnuotansu (Tianjin). The dimension of the graphite rod electrode is 5 mm × 50 mm and the platinum electrode is 5 mm × 5 mm × 0.1 mm. (The submerged height of the electrode is approximately 5 mm).

### **List of commercially available substrates :**

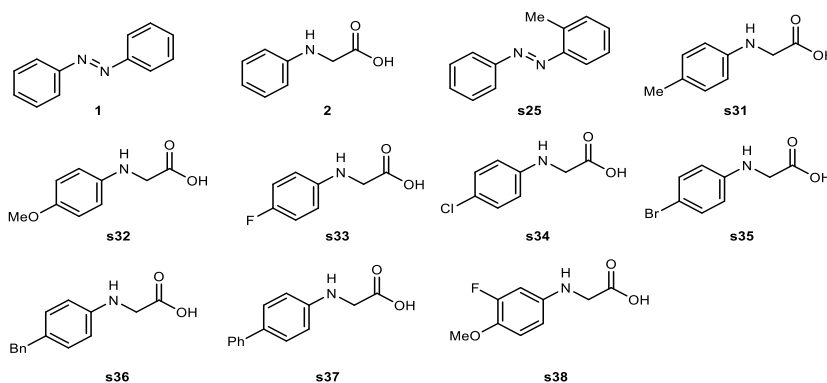

### List of unsuccessful substrates:

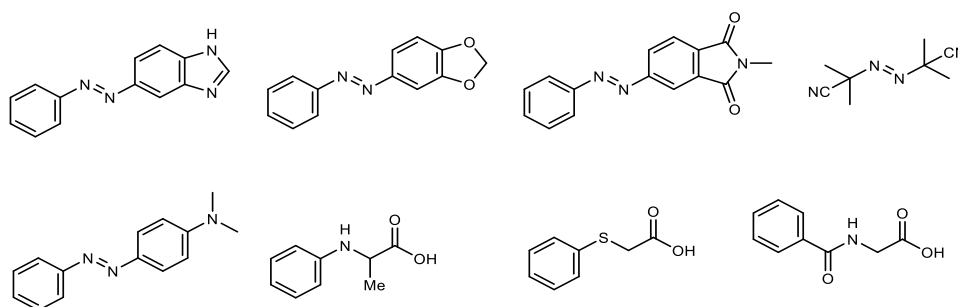

## II. Substrates Synthesis and Characterization

Synthesis of compounds **s4-s8**.

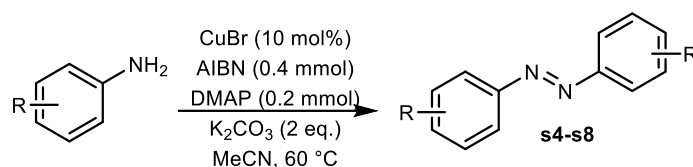

At room temperature, aniline derivatives (10 mmol, 1.0 eq.), CuBr (144 mg, 1 mmol, 0.1 eq.), AIBN (657 mg, 4 mmol, 0.4 eq.), DMAP (244 mg, 2 mmol, 0.2 eq.), K<sub>2</sub>CO<sub>3</sub> (2.77 g, 20 mmol, 2 eq.) and MeCN (30 mL) were added to a 100 mL round bottom flask, and then the resulting solution was stirred at 60 °C for 6 h. The solution was diluted with EtOAc (30 mL). The aqueous layer was extracted with EtOAc (3 × 30 mL). The combined EtOAc layers were washed with brine (3 × 30 mL), dried with Na<sub>2</sub>SO<sub>4</sub>, and concentrated *in vacuo*. The desired product **s4-s8** was purified by flash column chromatography using PE/EtOAc as eluent.

### (*E*)-1,2-Di-*p*-tolylidiazene (**s4**)

The <sup>1</sup>H spectra data matched with values reported in the literature.<sup>2</sup>

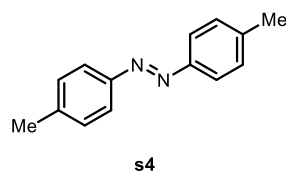

Yellow solid (0.96 g, 91% yield);

$^1\text{H NMR}$  (400 MHz,  $\text{CDCl}_3$ ):  $\delta$  7.84 (d,  $J = 8.1$  Hz, 4H), 7.34 (d,  $J = 7.9$  Hz, 4H), 2.46 (m, 6H).

**(E)-1-(4-Methoxyphenyl)-2-phenyldiazene (s5)**

The  $^1\text{H}$  spectra data matched with values reported in the literature.<sup>2</sup>

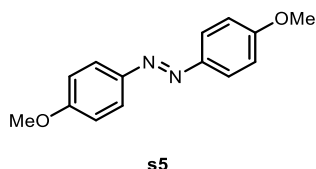

Yellow solid (1.06 g, 88% yield);

$^1\text{H NMR}$  (400 MHz,  $\text{CDCl}_3$ ):  $\delta$  7.91 (d,  $J = 9.0$  Hz, 4H), 7.03 (d,  $J = 9.0$  Hz, 4H), 3.91 (s, 6H).

**(E)-1,2-Bis(4-fluorophenyl)diazene (s6)**

The  $^1\text{H}$  spectra data matched with values reported in the literature.<sup>2</sup>

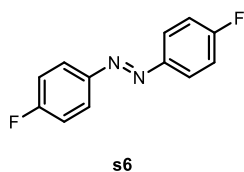

Yellow solid (0.95 g, 83% yield);

$^1\text{H NMR}$  (400 MHz,  $\text{CDCl}_3$ ):  $\delta$  7.95 (dd,  $J = 8.8, 5.2$  Hz, 4H), 7.23 (t,  $J = 8.6$  Hz, 4H).

**(E)-1,2-Bis(4-(trifluoromethyl)phenyl)diazene (s7)**

The  $^1\text{H}$  spectra data matched with values reported in the literature.<sup>2</sup>

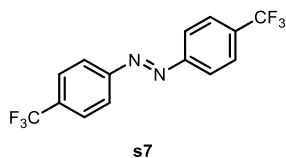

Yellow solid (1.27 g, 80% yield);

$^1\text{H NMR}$  (400 MHz,  $\text{CDCl}_3$ ):  $\delta$  8.07 (d,  $J = 8.2$  Hz, 4H), 7.84 (d,  $J = 8.4$  Hz, 4H).

**(E)-1,2-Di-*m*-tolylidiazene (s8)**

The  $^1\text{H}$  spectra data matched with values reported in the literature.<sup>2</sup>

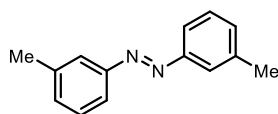

**s8**

Yellow solid (0.89 g, 85% yield);

$^1\text{H NMR}$  (400 MHz,  $\text{CDCl}_3$ ):  $\delta$  7.76 (s, 4H), 7.44 (t,  $J = 7.9$  Hz, 2H), 7.33 (d,  $J = 7.3$  Hz, 2H), 2.49 (s, 6H).

Synthesis of compounds **s9-s24**, **s26-s30**.

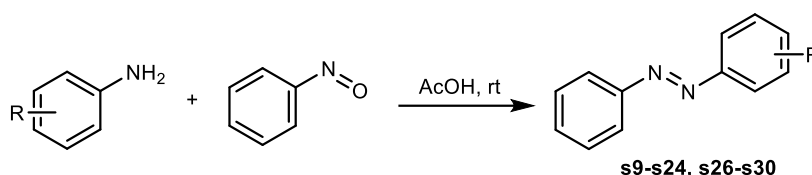

At room temperature, nitrosobenzene (558.6 mg, 6 mmol, 1.2 eq.) was added to a 50 mL round bottom flask, followed by AcOH (10 mL, 2 mL/mmol), and then the corresponding anilines (5 mmol, 1.0 eq.) was added dropwise to the above solution, and the resulting solution was stirred at room temperature for 24 h. The solution was diluted with EtOAc (30 mL) and quenched with  $\text{NaHCO}_3$  aqueous solution (30 mL). The aqueous layer was extracted with EtOAc ( $3 \times 30$  mL). The combined EtOAc layers were washed with brine ( $3 \times 30$  mL), dried with  $\text{Na}_2\text{SO}_4$ , and concentrated *in vacuo*. The desired product **s9-s24**, **s26-s30** was purified by flash column chromatography using PE/EtOAc as eluent.

#### **(E)-1-Phenyl-2-(p-tolyl)diazene (s9)**

The  $^1\text{H}$  spectra data matched with values reported in the literature.<sup>3</sup>

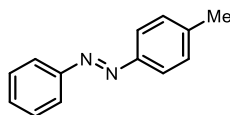

**s9**

Yellow solid (0.92 g, 94% yield);

**<sup>1</sup>H NMR** (400 MHz, CDCl<sub>3</sub>): δ 7.93 (d, *J* = 7.4 Hz, 2H), 7.87 (d, *J* = 8.0 Hz, 2H), 7.52 (dt, *J* = 15.4, 7.0 Hz, 3H), 7.35 (d, *J* = 8.0 Hz, 2H), 2.47 (s, 3H).

**(*E*)-1-(4-(*tert*-Butyl)phenyl)-2-phenyldiazene (s10)**

The <sup>1</sup>H spectra data matched with values reported in the literature.<sup>4</sup>

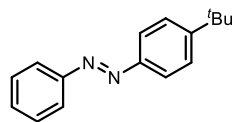

s10

Yellow solid (1.13 g, 95% yield);

**<sup>1</sup>H NMR** (400 MHz, CDCl<sub>3</sub>): δ 7.94 (d, *J* = 7.8 Hz, 2H), 7.90 (d, *J* = 8.3 Hz, 2H), 7.61 – 7.46 (m, 5H), 1.41 (s, 9H).

**(*E*)-1-(4-Benzylphenyl)-2-phenyldiazene (s11)**

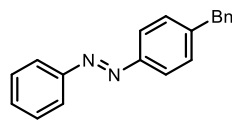

s11

Yellow solid (1.26g, 93% yield);

**<sup>1</sup>H NMR** (400 MHz, CDCl<sub>3</sub>): δ 7.93 (d, *J* = 7.2 Hz, 2H), 7.89 (d, *J* = 8.2 Hz, 2H), 7.53 (dt, *J* = 13.7, 7.0 Hz, 3H), 7.35 (dd, *J* = 13.8, 7.7 Hz, 4H), 7.26 (t, *J* = 7.0 Hz, 3H), 4.10 (s, 2H).

**HRMS (ESI):** Calcd. for C<sub>19</sub>H<sub>17</sub>N<sub>2</sub><sup>+</sup> [M + H]<sup>+</sup> 273.1386, found 273.1381.

**(*E*)-1-([1,1'-Biphenyl]-4-yl)-2-phenyldiazene (s12)**

The <sup>1</sup>H spectra data matched with values reported in the literature.<sup>6</sup>

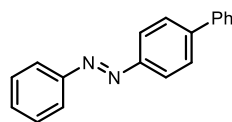

s12

Yellow solid (1.16 g, 90% yield);

**<sup>1</sup>H NMR** (400 MHz, CDCl<sub>3</sub>): δ 8.04 (d, *J* = 8.2 Hz, 2H), 7.98 (d, *J* = 7.8 Hz, 2H), 7.79 (d, *J* = 8.4 Hz, 2H), 7.71 (d, *J* = 7.4 Hz, 2H), 7.54 (dt, *J* = 21.8, 7.3 Hz, 5H), 7.43 (t, *J* = 7.3 Hz, 1H).

### **(E)-1-(4-Methoxyphenyl)-2-phenyldiazene (s13)**

The  $^1\text{H}$  spectra data matched with values reported in the literature.<sup>3</sup>

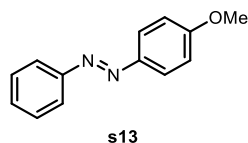

Yellow solid (1.02 g, 96% yield);

$^1\text{H NMR}$  (400 MHz,  $\text{CDCl}_3$ ):  $\delta$  7.96 (d,  $J = 8.9$  Hz, 2H), 7.91 (d,  $J = 7.4$  Hz, 2H), 7.53 (t,  $J = 7.4$  Hz, 2H), 7.47 (t,  $J = 7.2$  Hz, 1H), 7.05 (d,  $J = 8.9$  Hz, 2H), 3.92 (s, 3H).

### **(E)-1-Phenyl-2-(4-(trifluoromethoxy)phenyl)diazene (s14)**

The  $^1\text{H}$  spectra data matched with values reported in the literature.<sup>8</sup>

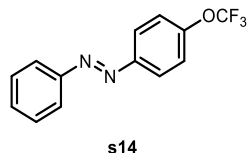

Yellow solid (1.06 g, 80% yield);

$^1\text{H NMR}$  (400 MHz,  $\text{CDCl}_3$ ):  $\delta$  8.00 (d,  $J = 8.9$  Hz, 2H), 7.95 (d,  $J = 6.8$  Hz, 2H), 7.55 (q,  $J = 8.0, 7.1$  Hz, 3H), 7.39 (d,  $J = 8.4$  Hz, 2H).

### **(E)-1-(4-(Methylthio)phenyl)-2-phenyldiazene (s15)**

The  $^1\text{H}$  spectra data matched with values reported in the literature.<sup>6</sup>

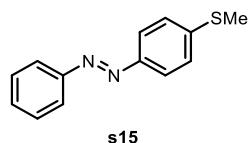

Yellow solid (0.86 g, 85% yield);

$^1\text{H NMR}$  (400 MHz,  $\text{CDCl}_3$ ):  $\delta$  7.99 – 7.86 (m, 4H), 7.53 (q,  $J = 7.2$  Hz, 3H), 7.38 (d,  $J = 8.5$  Hz, 2H), 2.59 (s, 3H).

### **(E)-1-(4-Fluorophenyl)-2-phenyldiazene (s16)**

The  $^1\text{H}$  spectra data matched with values reported in the literature.<sup>3</sup>

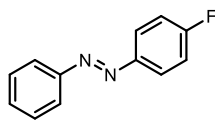

s16

Yellow solid (0.93 g, 93% yield);

$^1\text{H NMR}$  (400 MHz,  $\text{CDCl}_3$ ):  $\delta$  8.05 – 7.88 (m, 4H), 7.54 (dt,  $J = 11.5, 6.8$  Hz, 3H), 7.23 (t,  $J = 8.6$  Hz, 2H).

#### **(E)-1-(4-Chlorophenyl)-2-phenyldiazene (s17)**

The  $^1\text{H}$  spectra data matched with values reported in the literature.<sup>3</sup>

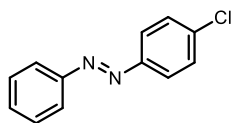

s17

Yellow solid (0.97 g, 90% yield);

$^1\text{H NMR}$  (400 MHz,  $\text{CDCl}_3$ ):  $\delta$  7.93 (dd,  $J = 15.0, 8.3$  Hz, 4H), 7.60 – 7.46 (m, 5H).

#### **(E)-1-(4-Bromophenyl)-2-phenyldiazene (s18)**

The  $^1\text{H}$  spectra data matched with values reported in the literature.<sup>3</sup>

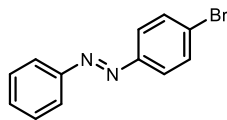

s18

Yellow solid (1.24 g, 95% yield);

$^1\text{H NMR}$  (400 MHz,  $\text{CDCl}_3$ ):  $\delta$  7.94 (d,  $J = 9.4$  Hz, 2H), 7.83 (d,  $J = 8.6$  Hz, 2H), 7.68 (d,  $J = 8.6$  Hz, 2H), 7.54 (q,  $J = 7.1, 6.6$  Hz, 3H).

#### **Methyl (E)-4-(phenyldiazenyl)benzoate (s19)**

The  $^1\text{H}$  spectra data matched with values reported in the literature.<sup>4</sup>

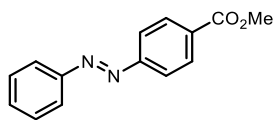

s19

Yellow solid (0.84 g, 70% yield);

$^1\text{H NMR}$  (400 MHz,  $\text{CDCl}_3$ ):  $\delta$  8.22 (d,  $J = 8.6$  Hz, 2H), 7.98 (d,  $J = 8.4$  Hz, 4H), 7.56

(d,  $J = 7.5$  Hz, 3H), 3.99 (s, 3H).

**Ethyl (*E*)-4-(phenyldiazenyl)benzoate (s20)**

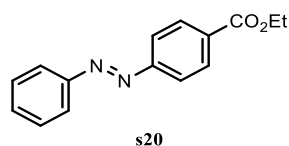

Yellow solid (0.91 g, 72% yield);

$^1\text{H NMR}$  (400 MHz,  $\text{CDCl}_3$ ):  $\delta$  8.30 – 8.16 (m, 2H), 8.05 – 7.88 (m, 4H), 7.64 – 7.51 (m, 3H), 4.56 – 4.39 (m, 2H), 1.45 (d,  $J = 7.0$  Hz, 3H).

$^{13}\text{C NMR}$  (101 MHz,  $\text{CDCl}_3$ ):  $\delta$  166.1, 155.1, 152.5, 132.2, 131.6, 130.5, 129.1, 123.1, 122.6, 61.2, 14.3.

**HRMS (ESI)**: Calcd. for  $\text{C}_{15}\text{H}_{15}\text{N}_2\text{O}_2^+$   $[\text{M} + \text{H}]^+$  255.1128, found 255.1145.

**(*E*)-1-(4-(Methylsulfonyl)phenyl)-2-phenyldiazenes (s21)**

The  $^1\text{H}$  spectra data matched with values reported in the literature.<sup>7</sup>

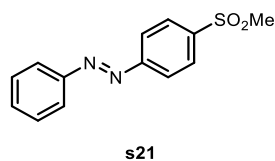

Yellow solid (1.0 g, 77% yield);

$^1\text{H NMR}$  (400 MHz,  $\text{CDCl}_3$ ):  $\delta$  8.11 (q,  $J = 8.7$  Hz, 4H), 8.00 (dd,  $J = 7.0, 2.5$  Hz, 2H), 7.58 (d,  $J = 4.8$  Hz, 3H), 3.14 (s, 3H).

**(*E*)-1-Phenyl-2-(4-(trifluoromethyl)phenyl)diazene (s22)**

The  $^1\text{H}$  spectra data matched with values reported in the literature.<sup>3</sup>

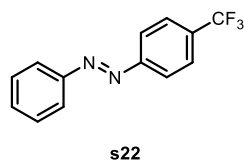

Yellow solid (0.79 g, 63% yield);

$^1\text{H NMR}$  (400 MHz,  $\text{CDCl}_3$ ):  $\delta$  8.04 (d,  $J = 8.3$  Hz, 2H), 8.01 – 7.95 (m, 2H), 7.81 (d,  $J = 8.3$  Hz, 2H), 7.57 (d,  $J = 7.0$  Hz, 3H).

**(*E*)-4-(Phenyldiazenyl)benzotrile (s23)**

The  $^1\text{H}$  spectra data matched with values reported in the literature.<sup>5</sup>

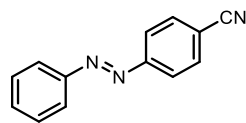

s23

Yellow solid (0.69 g, 67% yield);

$^1\text{H NMR}$  (400 MHz,  $\text{CDCl}_3$ ):  $\delta$  8.02 (d,  $J = 8.4$  Hz, 2H), 7.98 (dd,  $J = 6.5, 3.1$  Hz, 2H), 7.85 (d,  $J = 8.3$  Hz, 2H), 7.62 – 7.52 (m, 3H).

#### **(E)-1-Phenyl-2-(*m*-tolyl)diazene (s24)**

The  $^1\text{H}$  spectra data matched with values reported in the literature.<sup>3</sup>

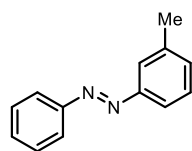

s24

Yellow solid (0.77 g, 79% yield);

$^1\text{H NMR}$  (400 MHz,  $\text{CDCl}_3$ ):  $\delta$  7.96 (d,  $J = 8.3$  Hz, 2H), 7.78 (s, 2H), 7.54 (dt,  $J = 13.7, 6.9$  Hz, 3H), 7.45 (t,  $J = 8.0$  Hz, 1H), 7.34 (d,  $J = 7.4$  Hz, 1H), 2.50 (s, 3H).

#### **(E)-1-(3,5-Dimethylphenyl)-2-phenyldiazene (s26)**

The  $^1\text{H}$  spectra data matched with values reported in the literature.<sup>5</sup>

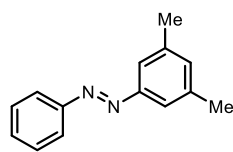

s26

Yellow solid (0.68 g, 65% yield);

$^1\text{H NMR}$  (400 MHz,  $\text{CDCl}_3$ ):  $\delta$  8.02 (d,  $J = 7.3$  Hz, 2H), 7.66 (s, 2H), 7.57 (dd,  $J = 16.6, 7.3$  Hz, 3H), 7.19 (s, 1H), 2.50 (s, 6H).

#### **(E)-1-(3-Fluoro-4-methoxyphenyl)-2-phenyldiazene (s27)**

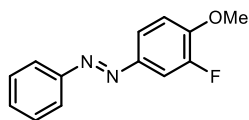

s27

Yellow solid (1.05 g, 91% yield);

$^1\text{H NMR}$  (400 MHz,  $\text{CDCl}_3$ ):  $\delta$  7.92 (d,  $J = 8.4$  Hz, 2H), 7.82 (d,  $J = 9.9$  Hz, 1H), 7.74 (d,  $J = 14.4$  Hz, 1H), 7.51 (dd,  $J = 14.3, 7.3$  Hz, 3H), 7.12 (t,  $J = 8.6$  Hz, 1H), 4.01 (s, 3H).

$^{13}\text{C NMR}$  (101 MHz,  $\text{CDCl}_3$ ):  $\delta$  153.9, 152.4, 151.4, 150.3, 146.7, 130.8, 129.1, 122.7, 112.4, 107.7, 56.3.

**HRMS (ESI):** Calcd. for  $\text{C}_{13}\text{H}_{12}\text{FN}_2\text{O}^+$  [ $\text{M} + \text{H}$ ] $^+$  231.1128, found 231.0925.

### **(E)-1-(2,3-Dihydro-1H-inden-5-yl)-2-phenyldiazene (s28)**

The  $^1\text{H}$  spectra data matched with values reported in the literature.<sup>6</sup>

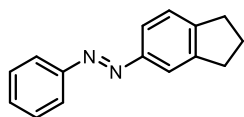

s28

Yellow solid (1.03 g, 93% yield);

$^1\text{H NMR}$  (400 MHz,  $\text{CDCl}_3$ ):  $\delta$  7.93 (d,  $J = 7.2$  Hz, 2H), 7.84 – 7.72 (m, 2H), 7.54 (t,  $J = 7.3$  Hz, 2H), 7.48 (t,  $J = 7.2$  Hz, 1H), 7.39 (d,  $J = 7.8$  Hz, 1H), 3.02 (q,  $J = 7.3$  Hz, 4H), 2.18 (p,  $J = 7.4$  Hz, 2H).

### **(E)-5-(Phenyldiazenyl)benzo[d]thiazole (s29)**

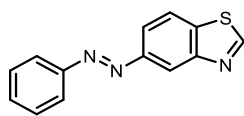

s29

Yellow solid (1.06 g, 89% yield);

$^1\text{H NMR}$  (400 MHz,  $\text{CDCl}_3$ ):  $\delta$  9.12 (s, 1H), 8.73 (s, 1H), 8.14 – 8.06 (m, 2H), 8.01 (d,  $J = 7.0$  Hz, 2H), 7.56 (dt,  $J = 12.5, 6.9$  Hz, 3H).

$^{13}\text{C NMR}$  (101 MHz,  $\text{CDCl}_3$ ):  $\delta$  155.4, 153.9, 152.5, 151.6, 136.2, 131.2, 129.1, 123.0, 122.1, 120.5, 119.8, 118.8.

**HRMS (ESI):** Calcd. for  $\text{C}_{13}\text{H}_{10}\text{N}_3\text{S}^+$  [ $\text{M} + \text{H}$ ] $^+$  240.0590, found 240.0583.

**(E)-6-(Phenyldiazenyl)-3,4-dihydronaphthalen-1(2H)-one (s30)**

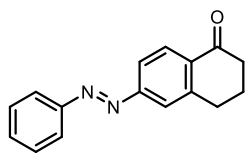

s30

Yellow solid (1.10 g, 88% yield);

<sup>1</sup>H NMR (400 MHz, CDCl<sub>3</sub>): δ 8.22 (d, *J* = 8.3 Hz, 1H), 7.98 (d, *J* = 8.0 Hz, 2H), 7.85 (d, *J* = 8.3 Hz, 1H), 7.80 (s, 1H), 7.56 (d, *J* = 7.1 Hz, 3H), 3.12 (t, *J* = 6.0 Hz, 2H), 2.79 – 2.70 (m, 2H), 2.23 (dt, *J* = 12.3, 6.2 Hz, 2H).

<sup>13</sup>C NMR (101 MHz, CDCl<sub>3</sub>): δ 197.7, 155.0, 152.6, 145.5, 133.8, 131.7, 129.2, 128.4, 123.1, 123.0, 120.8, 39.1, 29.9, 23.2.

**HRMS (ESI):** Calcd. for C<sub>16</sub>H<sub>15</sub>N<sub>2</sub>O<sup>+</sup> [M + H]<sup>+</sup> 251.1179, found 251.1216.

### III. Investigation of Reaction Conditions

**Table S1.** Investigation of solvents<sup>a</sup>:

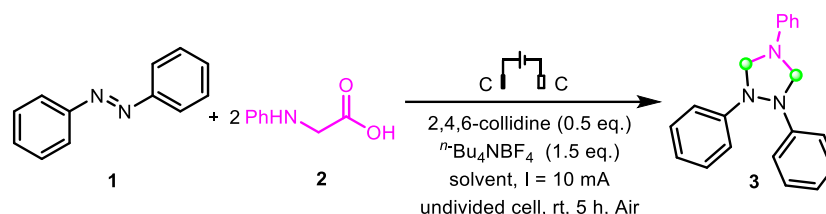

| entry | variation of solvents | Yield (%) <sup>b</sup> |
|-------|-----------------------|------------------------|
| 1     | DCM                   | 8                      |
| 2     | DMF                   | 30                     |
| 3     | EtOH                  | trace                  |
| 4     | MeCN                  | 42                     |

<sup>a</sup>Standard conditions: graphite rod anode ( $d = 5 \text{ mm}$ ), graphite rod anode ( $d = 5 \text{ mm}$ ), **1** (0.2 mmol), **2** (0.8 mmol),  $n\text{-Bu}_4\text{NBF}_4$  (1.5 eq.), 2,4,6-collidine (0.5 eq.), solvent (3 mL), undivided cell, constant current = 10 mA, room temperature, air atmosphere, 5 h. <sup>b</sup>Isolated yield.

**Table S2.** Investigation of cathodes<sup>a</sup>:

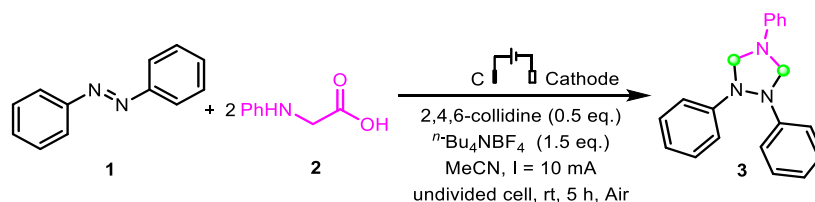

| entry | variation of cathodes | Yield (%) <sup>b</sup> |
|-------|-----------------------|------------------------|
| 1     | steel                 | 20                     |
| 2     | Pt                    | 55                     |
| 3     | RVC                   | 38                     |
| 4     | Ni                    | 29                     |

<sup>a</sup>Standard conditions: graphite rod anode ( $d = 5 \text{ mm}$ ), cathodes, **1** (0.2 mmol), **2** (0.8 mmol),  $n\text{-Bu}_4\text{NBF}_4$  (1.5 eq.), 2,4,6-collidine (0.5 eq.), MeCN (3 mL), undivided cell, constant current = 10 mA, room temperature, air atmosphere, 5 h. <sup>b</sup>Isolated yield.

**Table S3.** Investigation of electrolytes<sup>a</sup>: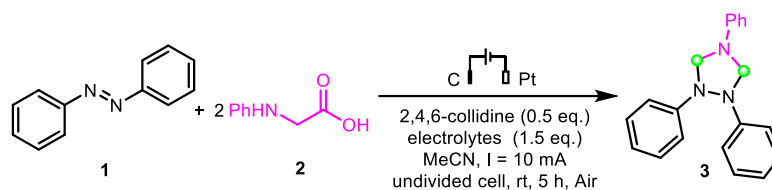

| entry | variation of electrolytes                             | Yield (%) <sup>b</sup> |
|-------|-------------------------------------------------------|------------------------|
| 1     | <i>n</i> -Bu <sub>4</sub> NPF <sub>6</sub> (1.5 eq.)  | 60                     |
| 2     | <i>n</i> -Bu <sub>4</sub> NBr (1.5 eq.)               | 58                     |
| 3     | Et <sub>4</sub> NOTs (1.5 eq.)                        | 60                     |
| 4     | <i>n</i> -Bu <sub>4</sub> NClO <sub>4</sub> (1.5 eq.) | 70                     |
| 5     | K <sub>3</sub> PO <sub>4</sub> (1.5 eq.)              | trace                  |

<sup>a</sup>Standard conditions: graphite rod anode (d = 5 mm), Pt plate cathode (0.5 cm × 0.5 cm), **1** (0.2 mmol), **2** (0.8 mmol), electrolytes (1.5 eq.), 2,4,6-collidine (0.5 eq.), MeCN (3 mL), undivided cell, constant current = 10 mA, room temperature, air atmosphere, 5 h. <sup>b</sup>Isolated yield.

**Table S4.** Investigation of mediators<sup>a</sup>: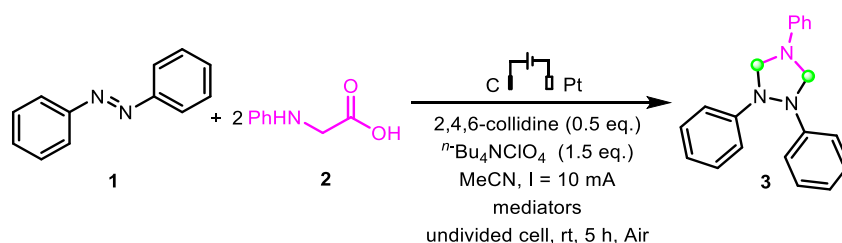

| entry | variation of mediators    | Yield (%) <sup>b</sup> |
|-------|---------------------------|------------------------|
| 1     | Ferrocene (0.2 eq.)       | 47                     |
| 2     | NHPI (0.2 eq.)            | 13                     |
| 3     | H <sub>2</sub> O (0.2 mL) | 80                     |
| 4     | H <sub>2</sub> O (0.5 mL) | 90                     |

<sup>a</sup>Standard conditions: graphite rod anode (d = 5 mm), Pt plate cathode (0.5 cm × 0.5 cm), **1** (0.2 mmol), **2** (0.8 mmol), *n*-Bu<sub>4</sub>NClO<sub>4</sub> (1.5 eq.), 2,4,6-collidine (0.5 eq.), mediators, MeCN (3 mL), undivided cell, constant current = 10 mA, room temperature, air atmosphere, 5 h. <sup>b</sup>Isolated yield.

**Table S5.** Investigation of other conditions<sup>a</sup>:

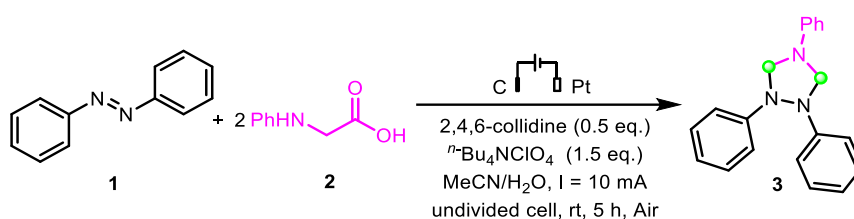

| entry | variation from standard conditions                         | Yield (%) <sup>b</sup> |
|-------|------------------------------------------------------------|------------------------|
| 1     | none                                                       | 90                     |
| 2     | no H <sub>2</sub> O                                        | 25                     |
| 3     | no 2,4,6-collidine                                         | 47                     |
| 4     | Et <sub>3</sub> N instead of 2,4,6-collidine               | 28                     |
| 5     | 1.0 mL H <sub>2</sub> O instead of 0.5 mL H <sub>2</sub> O | 65                     |
| 6     | 5 mA instead of 10 mA                                      | 5                      |
| 7     | 7 mA instead of 10 mA                                      | 70                     |
| 8     | 15 mA instead of 10 mA                                     | 67                     |
| 9     | no electric current                                        | 0                      |

<sup>a</sup>Standard conditions: graphite rod anode (d = 5 mm), Pt plate cathode (0.5 cm × 0.5 cm), **1** (0.2 mmol), **2** (0.8 mmol), <sup>t</sup>Bu<sub>4</sub>NClO<sub>4</sub> (1.5 eq.), 2,4,6-collidine (0.5 eq.), MeCN/H<sub>2</sub>O (v/v, 6/1, 3.5 mL), undivided cell, constant current = 10 mA, room temperature, air atmosphere, 5 h. <sup>b</sup>Isolated yield.

## IV. Experimental Procedures and Compound Characterization

### General procedure for electrochemical decarboxylative cyclization reaction

#### (Procedure A):

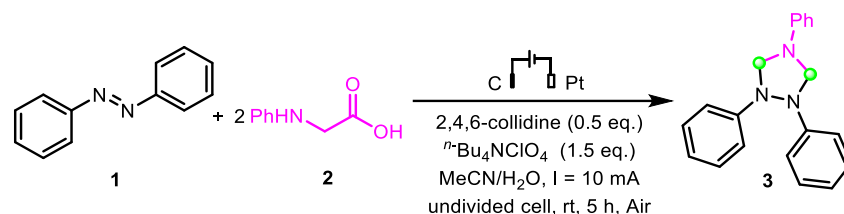

To a 10 mL distillation flask equipped with a magnetic stirring rod, azobenzene **1** (36.5 mg, 0.2 mmol, 1.0 eq.), *N*-phenyl glycine **2** (121 mg, 0.8 mmol, 4.0 eq.), 2,4,6-collidine (12.1 mg, 0.04 mmol, 0.5 eq.),  $n\text{-Bu}_4\text{NClO}_4$  (103 mg, 0.3 mmol, 1.5 eq.), H<sub>2</sub>O (0.5 mL) and CH<sub>3</sub>CN (3.0 mL) were added. The flask was equipped with a graphite rod anode ( $d = 5$  mm) and a platinum cathode. The resulting solution was stirred and electrolyzed at a constant current of 10 mA (Single Output DC Power Supply: KRP-305DM, the voltage range is 2.0 V – 3.3 V) for 5 h (4.7 F/mol) at room temperature. The solution was diluted with EtOAc (5 mL) and brine (20 mL) and extracted with EtOAc ( $3 \times 20$  mL). The combined organic layers were washed with brine ( $3 \times 20$  mL), dried with Na<sub>2</sub>SO<sub>4</sub>, and concentrated *in vacuo*. Purification by flash column chromatography using PE/EtOAc ( $v/v = 100/1$ ) as eluent afforded the desired product **3** (Fig.S1).

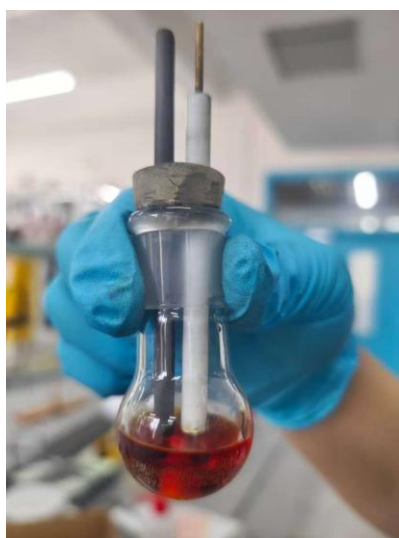

Fig.S1 Experiment setup for the synthesis of **3**

### 1,2,4-Triphenyl-1,2,4-triazolidine (3)

The  $^1\text{H}$  and  $^{13}\text{C}$  spectra data matched with values reported in the literature.<sup>10</sup>

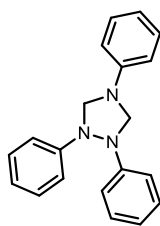

3

White solid (54.2 mg, 90% yield); mp: 134.5-135.1 °C;

$^1\text{H}$  NMR (400 MHz,  $\text{CDCl}_3$ ):  $\delta$  7.32 – 7.15 (m, 10H), 6.97 – 6.93 (t,  $J = 7.2$  Hz, 2H), 6.77 (t,  $J = 7.4$  Hz, 1H), 6.59 (d,  $J = 8.0$  Hz, 2H), 4.87 (s, 2H), 4.69 (s, 2H).

$^{13}\text{C}$  NMR (101 MHz,  $\text{CDCl}_3$ ):  $\delta$  150.2, 145.1, 129.4, 129.3, 121.6, 118.4, 115.0, 113.3, 67.1.

### 4-Phenyl-1,2-di-*p*-tolyl-1,2,4-triazolidine (4)

The  $^1\text{H}$  and  $^{13}\text{C}$  spectra data matched with values reported in the literature.<sup>10</sup>

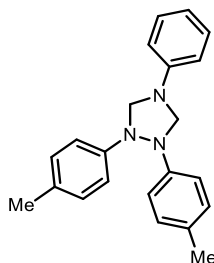

4

White solid (59.8 mg, 91% yield); mp: 130.1-131.2 °C;

$^1\text{H}$  NMR (400 MHz,  $\text{CDCl}_3$ ):  $\delta$  7.29 – 7.23 (dd,  $J = 15.5, 7.9$  Hz, 2H), 7.12 (s, 8H), 6.81 – 6.77 (t,  $J = 7.3$  Hz, 1H), 6.61 – 6.59 (d,  $J = 8.4$  Hz, 2H), 4.85 (s, 2H), 4.68 (s, 2H), 2.31 (s, 6H).

$^{13}\text{C}$  NMR (101 MHz,  $\text{CDCl}_3$ ):  $\delta$  148.0, 145.2, 130.9, 129.7, 129.3, 118.2, 115.1, 113.2, 67.1, 20.5.

### 1,2-Bis(4-methoxyphenyl)-4-phenyl-1,2,4-triazolidine (5)

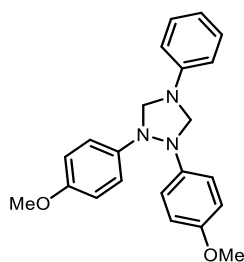

5

Colorless oil (51.2 mg, 71% yield);

$^1\text{H NMR}$  (400 MHz,  $\text{CDCl}_3$ ):  $\delta$  7.29 – 7.23 (dd,  $J = 14.9, 6.7$  Hz, 2H), 7.18 – 7.16 (d,  $J = 9.0$  Hz, 4H), 6.88 – 6.86 (d,  $J = 9.0$  Hz, 4H), 6.81 – 6.78 (t,  $J = 7.3$  Hz, 1H), 6.61 – 6.59 (d,  $J = 8.0$  Hz, 2H), 4.78 (s, 2H), 4.70 (s, 2H), 3.80 (s, 6H).

$^{13}\text{C NMR}$  (101 MHz,  $\text{CDCl}_3$ ):  $\delta$  154.8, 145.1, 144.1, 129.3, 129.1, 124.3, 120.9, 118.1, 117.6, 116.7, 114.4, 114.1, 113.1, 68.6, 67.5, 55.6, 55.5.

**HRMS (ESI):** Calcd. for  $\text{C}_{23}\text{H}_{28}\text{N}_3\text{O}_3^+$  [ $\text{M} + \text{MeOH} + \text{H}$ ] $^+$  394.2125, found 394.2119.

#### 1,2-Bis(4-fluorophenyl)-4-phenyl-1,2,4-triazolidine (6)

The  $^1\text{H}$  and  $^{13}\text{C}$  spectra data matched with values reported in the literature.<sup>10</sup>

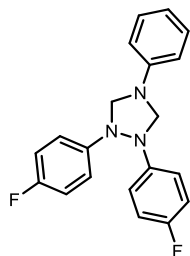

6

White solid (57.8 mg, 86% yield); mp: 118.2-119.1 °C;

$^1\text{H NMR}$  (400 MHz,  $\text{CDCl}_3$ ):  $\delta$  7.21 (s, 2H), 7.09 (s, 4H), 6.96 (s, 4H), 6.77 (t,  $J = 7.4$  Hz, 1H), 6.59 – 6.54 (m, 2H), 4.70 (d,  $J = 23.0$  Hz, 4H).

$^{13}\text{C NMR}$  (101 MHz,  $\text{CDCl}_3$ ):  $\delta$  158.3 (d,  $J = 242.4$  Hz), 146.5 (d,  $J = 2.0$  Hz), 145.0, 129.5, 118.7, 116.6 (d,  $J = 8.2$  Hz), 115.8 (d,  $J = 22.4$  Hz), 113.4, 67.8.

#### 4-Phenyl-1,2-bis(4-(trifluoromethyl)phenyl)-1,2,4-triazolidine (7)

The  $^1\text{H}$  and  $^{13}\text{C}$  spectra data matched with values reported in the literature.<sup>10</sup>

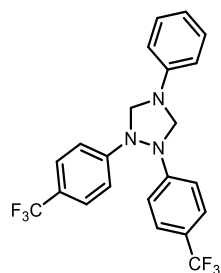

7

White solid (49.0 mg, 56% yield); mp: 83.5-85.1 °C;

$^1\text{H NMR}$  (400 MHz,  $\text{CDCl}_3$ ):  $\delta$  7.58 – 7.56 (d,  $J = 8.5$  Hz, 4H), 7.31 – 7.20 (m, 2H), 7.22 – 7.20 (d,  $J = 8.4$  Hz, 4H), 6.89 – 6.86 (t,  $J = 7.3$  Hz, 1H), 6.67 – 6.65 (d,  $J = 7.9$  Hz, 2H), 4.94 (s, 2H), 4.78 (s, 2H).

$^{13}\text{C NMR}$  (101 MHz,  $\text{CDCl}_3$ ):  $\delta$  152.2, 144.6, 129.5, 126.7 (q,  $J = 3.8$  Hz), 125.7 (m), 123.3 (d,  $J = 30.0$  Hz), 119.4, 114.5, 114.4, 113.7, 67.1.

#### 4-Phenyl-1,2-di-*m*-tolyl-1,2,4-triazolidine (8)

The  $^1\text{H}$  and  $^{13}\text{C}$  spectra data matched with values reported in the literature.<sup>10</sup>

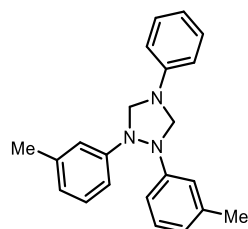

8

White solid (56.0 mg, 85% yield); mp: 56.2-58.0 °C;

$^1\text{H NMR}$  (400 MHz,  $\text{CDCl}_3$ ):  $\delta$  7.29 – 7.19 (m, 4H), 7.05 – 7.00 (m, 4H), 6.82 – 6.80 (d,  $J = 6.7$  Hz, 3H), 6.63 – 6.61 (d,  $J = 7.2$  Hz, 2H), 4.89 (s, 2H), 4.70 (s, 2H), 2.36 (s, 6H).

$^{13}\text{C NMR}$  (101 MHz,  $\text{CDCl}_3$ ):  $\delta$  150.2, 145.1, 139.1, 129.3, 129.1, 122.4, 118.2, 115.6, 113.2, 112.1, 67.0, 21.7.

### 1,4-Diphenyl-2-(*p*-tolyl)-1,2,4-triazolidine (9)

The  $^1\text{H}$  and  $^{13}\text{C}$  spectra data matched with values reported in the literature.<sup>10</sup>

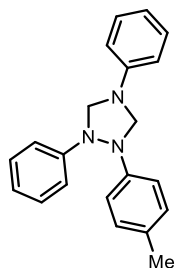

9

White solid (54.2 mg, 86% yield); mp: 104.2-106.5 °C;

$^1\text{H NMR}$  (400 MHz,  $\text{CDCl}_3$ ):  $\delta$  7.29 – 7.15 (ddd,  $J = 32.9, 16.4, 8.1$  Hz, 6H), 7.08 (s, 4H), 6.95 – 6.91 (t,  $J = 7.2$  Hz, 1H), 6.78 – 6.74 (t,  $J = 7.3$  Hz, 1H), 6.58 – 7.56 (d,  $J = 7.8$  Hz, 2H), 4.83 (s, 2H), 4.70 – 4.61 (d,  $J = 36.2$  Hz, 2H), 2.27 (s, 3H).

$^{13}\text{C NMR}$  (101 MHz,  $\text{CDCl}_3$ ):  $\delta$  150.2, 148.0, 145.2, 131.1, 129.7, 129.4, 129.2, 121.4, 118.3, 115.3, 114.9, 113.2, 67.4, 66.9, 20.6.

### 1-(4-(*tert*-Butyl)phenyl)-2,4-diphenyl-1,2,4-triazolidine (10)

The  $^1\text{H}$  and  $^{13}\text{C}$  spectra data matched with values reported in the literature.<sup>10</sup>

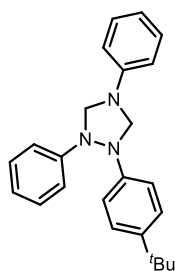

10

White solid (55.7 mg, 78% yield); mp: 119.2-121.1 °C;

$^1\text{H NMR}$  (400 MHz,  $\text{CDCl}_3$ ):  $\delta$  7.34 – 7.32 (d,  $J = 8.6$  Hz, 2H), 7.31 – 7.29 (d,  $J = 7.9$  Hz, 2H), 7.27 – 7.23 (m, 2H), 7.22 – 7.20 (d,  $J = 7.9$  Hz, 2H), 7.16 – 7.14 (d,  $J = 8.7$  Hz, 2H), 6.99 – 6.95 (t,  $J = 7.2$  Hz, 1H), 6.81 – 6.77 (t,  $J = 7.3$  Hz, 1H), 6.61 – 6.59 (d,  $J = 7.9$  Hz, 2H), 4.89 (s, 2H), 4.74 – 4.67 (d,  $J = 25.2$  Hz, 2H), 1.32 (s, 9H).

$^{13}\text{C}$  NMR (101 MHz,  $\text{CDCl}_3$ ):  $\delta$  150.1, 147.8, 145.1, 144.5, 129.4, 129.2, 126.0, 121.4, 118.2, 115.0, 114.9, 113.2, 67.2, 67.0, 34.1, 31.5.

### 1-(4-Benzylphenyl)-2,4-diphenyl-1,2,4-triazolidine (11)

The  $^1\text{H}$  and  $^{13}\text{C}$  spectra data matched with values reported in the literature.<sup>10</sup>

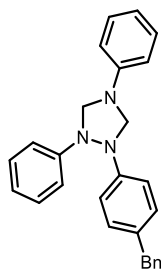

11

White solid (62.4 mg, 80% yield); mp: 118.2-119.1 °C;

$^1\text{H}$  NMR (400 MHz,  $\text{CDCl}_3$ ):  $\delta$  7.31 – 7.29 (d,  $J = 10.3$  Hz, 5H), 7.22 – 7.18 (m, 6H), 7.12 (s, 4H), 6.98 – 6.95 (t,  $J = 7.1$  Hz, 1H), 6.81 – 6.77 (t,  $J = 7.3$  Hz, 1H), 6.61 – 6.59 (d,  $J = 8.0$  Hz, 2H), 4.86 (s, 2H), 4.72 – 4.66 (d,  $J = 23.5$  Hz, 2H), 3.94 (m, 2H).

$^{13}\text{C}$  NMR (101 MHz,  $\text{CDCl}_3$ ):  $\delta$  150.1, 148.4, 145.0, 141.4, 134.4, 129.6, 129.3, 129.1, 128.8, 128.4, 125.9, 121.4, 118.2, 115.2, 114.8, 113.2, 67.2, 67.0, 41.0.

### 1-([1,1'-Biphenyl]-4-yl)-2,4-diphenyl-1,2,4-triazolidine (12)

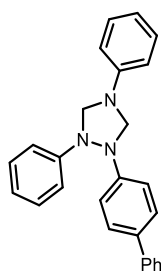

12

White solid (61.7 mg, 82% yield); mp: 126.2-128.1 °C;

$^1\text{H}$  NMR (400 MHz,  $\text{CDCl}_3$ ):  $\delta$  7.64 – 7.60 (t,  $J = 8.0$  Hz, 4H), 7.51 – 7.47 (t,  $J = 7.5$  Hz, 2H), 7.40 – 7.36 (m, 3H), 7.34 – 7.27 (m, 6H), 7.07 – 7.04 (t,  $J = 6.8$  Hz, 1H), 6.89 – 6.85 (t,  $J = 7.0$  Hz, 1H), 6.69 – 6.67 (m, 2H), 4.97 (s, 2H), 4.79 (s, 2H).

$^{13}\text{C}$  NMR (101 MHz,  $\text{CDCl}_3$ ):  $\delta$  150.1, 149.5, 145.1, 140.9, 134.6, 129.4, 129.3, 128.8, 128.0, 126.7, 121.7, 118.5, 115.3, 115.1, 113.3, 67.2, 67.0.

**HRMS (ESI):** Calcd. for  $\text{C}_{26}\text{H}_{23}\text{N}_3\text{Na}^+$   $[\text{M} + \text{Na}]^+$  400.1784, found 400.1719.

### 1-(4-Methoxyphenyl)-2,4-diphenyl-1,2,4-triazolidine (13)

The  $^1\text{H}$  and  $^{13}\text{C}$  spectra data matched with values reported in the literature.<sup>11</sup>

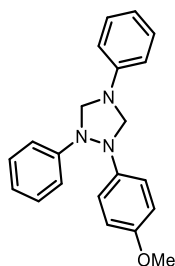

13

White solid (47 mg, 71% yield); mp: 91.4-93.1 °C;

$^1\text{H}$  NMR (400 MHz,  $\text{CDCl}_3$ ):  $\delta$  7.29 – 7.25 (t,  $J$  = 7.8 Hz, 2H), 7.23 – 7.19 (m, 2H), 7.17 – 7.15 (d,  $J$  = 8.1 Hz, 2H), 7.14 – 7.12 (d,  $J$  = 9.0 Hz, 2H), 6.94 – 6.91 (t,  $J$  = 7.3 Hz, 1H), 6.84 – 6.82 (d,  $J$  = 9.0 Hz, 2H), 6.78 – 6.74 (t,  $J$  = 7.4 Hz, 1H), 6.58 – 6.56 (d,  $J$  = 8.0 Hz, 2H), 4.77 (s, 3H), 4.57 (s, 1H), 3.75 (s, 3H).

$^{13}\text{C}$  NMR (101 MHz,  $\text{CDCl}_3$ ):  $\delta$  155.1, 150.1, 145.1, 144.1, 129.4, 129.2, 121.2, 118.2, 117.0, 114.7, 114.5, 113.2, 67.8, 67.0, 55.6.

### 1,4-Diphenyl-2-(4-(trifluoromethoxy)phenyl)-1,2,4-triazolidine (14)

The  $^1\text{H}$  and  $^{13}\text{C}$  spectra data matched with values reported in the literature.<sup>11</sup>

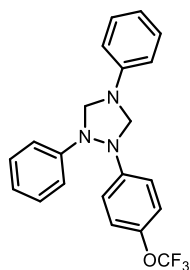

14

Colorless oil (53.9 mg, 70% yield);

$^1\text{H NMR}$  (400 MHz,  $\text{CDCl}_3$ ):  $\delta$  7.35 – 7.31 (t,  $J = 7.9$  Hz, 2H), 7.29 – 7.25 (m, 2H), 7.20 – 7.16 (m, 6H), 7.03 – 7.00 (t,  $J = 7.3$  Hz, 1H), 6.85 – 6.82 (t,  $J = 7.4$  Hz, 1H), 6.64 – 6.62 (d,  $J = 7.8$  Hz, 2H), 4.90 – 4.85 (d,  $J = 18.9$  Hz, 2H), 4.73 (s, 2H).

$^{13}\text{C NMR}$  (101 MHz,  $\text{CDCl}_3$ ):  $\delta$  149.9, 148.8, 144.9, 143.6 (d,  $J = 2.0$  Hz), 129.4 (d,  $J = 17.2$  Hz) 122.1, 122.0, 120.6 (d,  $J = 262.6$  Hz), 118.7, 115.8, 115.0, 113.4, 67.4, 67.3.

### 1-(4-(Methylthio)phenyl)-2,4-diphenyl-1,2,4-triazolidine (15)

The  $^1\text{H}$  and  $^{13}\text{C}$  spectra data matched with values reported in the literature.<sup>9</sup>

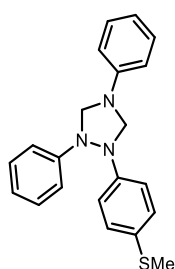

15

White solid (57.6 mg, 83% yield); mp: 102.2-103.1 °C;

$^1\text{H NMR}$  (400 MHz,  $\text{CDCl}_3$ ):  $\delta$  7.34 – 7.24 (dq,  $J = 15.3, 8.0$  Hz, 6H), 7.20 – 7.18 (d,  $J = 8.2$  Hz, 2H), 7.16 – 7.14 (d,  $J = 8.6$  Hz, 2H), 7.01 – 6.97 (t,  $J = 7.2$  Hz, 1H), 6.83 – 6.80 (t,  $J = 7.2$  Hz, 1H), 6.63 – 6.61 (d,  $J = 8.0$  Hz, 2H), 4.86 (s, 2H), 4.71 (s, 2H), 2.47 (s, 3H).

$^{13}\text{C NMR}$  (101 MHz,  $\text{CDCl}_3$ ):  $\delta$  150.0, 148.5, 145.0, 129.9, 129.7, 129.4, 129.2, 121.6, 118.5, 115.7, 115.0, 113.3, 67.2, 67.1, 17.8.

### 1-(4-Fluorophenyl)-2,4-diphenyl-1,2,4-triazolidine (16)

The  $^1\text{H}$  and  $^{13}\text{C}$  spectra data matched with values reported in the literature.<sup>11</sup>

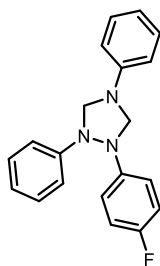

16

White solid (52.8 mg, 83% yield); mp: 97.2-99.1 °C;

$^1\text{H NMR}$  (400 MHz,  $\text{CDCl}_3$ ):  $\delta$  7.34 – 7.25 (m, 4H), 7.20 – 7.14 (m, 4H), 7.03 – 6.97 (m, 3H), 6.84 – 6.80 (t,  $J = 7.4$  Hz, 1H), 6.64 – 6.62 (d,  $J = 8.0$  Hz, 2H), 4.84 (s, 1H), 4.78 – 4.68 (d,  $J = 40.8$  Hz, 3H).

$^{13}\text{C NMR}$  (101 MHz,  $\text{CDCl}_3$ ):  $\delta$  158.5 (d,  $J = 242.4$  Hz), 150.0, 146.6 (d,  $J = 1.4$  Hz), 145.0, 129.4, 129.2, 121.6, 118.5, 116.7 (d,  $J = 7.4$  Hz), 115.8 (d,  $J = 24.4$  Hz), 114.9, 113.3, 67.7, 67.2.

### 1-(4-Chlorophenyl)-2,4-diphenyl-1,2,4-triazolidine (17)

The  $^1\text{H}$  and  $^{13}\text{C}$  spectra data matched with values reported in the literature.<sup>11</sup>

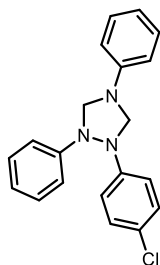

17

White solid (56.2 mg, 84% yield); mp: 119.9-122.1 °C;

$^1\text{H NMR}$  (400 MHz,  $\text{CDCl}_3$ ):  $\delta$  7.35 – 7.31 (t,  $J = 8.0$  Hz, 2H), 7.28 – 7.26 (d,  $J = 6.9$  Hz, 4H), 7.20 – 7.18 (d,  $J = 7.8$  Hz, 2H), 7.15 – 7.13 (d,  $J = 8.9$  Hz, 2H), 7.03 – 6.99 (t,  $J = 7.3$  Hz, 1H), 6.86 – 6.82 (t,  $J = 7.7$  Hz, 1H), 6.64 – 6.62 (d,  $J = 8.3$  Hz, 2H), 4.89 – 4.84 (d,  $J = 20.3$  Hz, 2H), 4.72 (s, 2H).

$^{13}\text{C NMR}$  (101 MHz,  $\text{CDCl}_3$ ):  $\delta$  149.9, 148.8, 145.0, 129.5, 129.3, 129.1, 126.5, 121.9, 118.7, 116.3, 115.1, 113.4, 67.3, 67.2.

### 1-(4-Bromophenyl)-2,4-diphenyl-1,2,4-triazolidine (18)

The  $^1\text{H}$  and  $^{13}\text{C}$  spectra data matched with values reported in the literature.<sup>11</sup>

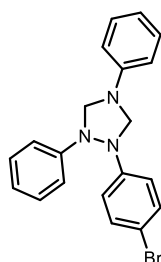

18

White solid (62.0 mg, 82% yield); mp: 156.2-158.5 °C;

$^1\text{H NMR}$  (400 MHz,  $\text{CDCl}_3$ ):  $\delta$  7.41 – 7.39 (d,  $J = 8.8$  Hz, 2H), 7.34 – 7.24 (dt,  $J = 22.5, 7.9$  Hz, 4H), 7.18 – 7.16 (d,  $J = 7.8$  Hz, 2H), 7.09 – 7.07 (d,  $J = 8.9$  Hz, 2H), 7.02 – 6.98 (t,  $J = 7.3$  Hz, 1H), 6.84 – 6.81 (t,  $J = 7.4$  Hz, 1H), 6.63 – 6.61 (d,  $J = 7.9$  Hz, 2H), 4.89 – 4.82 (d,  $J = 28.8$  Hz, 2H), 4.71 (s, 2H).

$^{13}\text{C NMR}$  (101 MHz,  $\text{CDCl}_3$ ):  $\delta$  149.8, 149.2, 144.9, 132.0, 129.4, 129.2, 121.9, 118.7, 116.6, 115.0, 113.8, 113.3, 67.3, 67.0.

### Methyl 4-(2,4-diphenyl-1,2,4-triazolidin-1-yl)benzoate (19)

The  $^1\text{H}$  and  $^{13}\text{C}$  spectra data matched with values reported in the literature.<sup>10</sup>

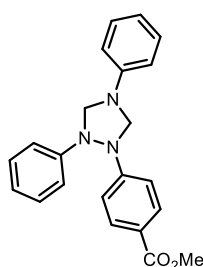

19

Colorless oil (43.0 mg, 60% yield);

$^1\text{H NMR}$  (400 MHz,  $\text{CDCl}_3$ ):  $\delta$  8.00 – 7.98 (d,  $J = 8.8$  Hz, 2H), 7.35 – 7.25 (dq,  $J = 15.4, 8.1$  Hz, 4H), 7.18 – 7.13 (m, 4H), 7.05 – 7.01 (t,  $J = 7.3$  Hz, 1H), 6.86 – 6.82 (t,  $J = 7.3$  Hz, 1H), 6.66 – 6.64 (d,  $J = 7.9$  Hz, 2H), 4.98 (s, 1H), 4.88 (s, 2H), 4.61 (s, 1H),

3.90 (s, 3H).

$^{13}\text{C}$  NMR (101 MHz,  $\text{CDCl}_3$ ):  $\delta$  166.9, 153.1, 149.8, 144.8, 131.2, 129.4, 129.3, 122.5, 122.4, 118.9, 115.4, 113.5, 113.3, 67.9, 66.0, 51.8.

### Ethyl 4-(2,4-diphenyl-1,2,4-triazolidin-1-yl)benzoate (**20**)

The  $^1\text{H}$  and  $^{13}\text{C}$  spectra data matched with values reported in the literature.<sup>11</sup>

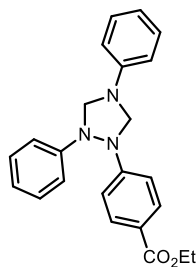

**20**

Colorless oil (44.8 mg, 60% yield);

$^1\text{H}$  NMR (400 MHz,  $\text{CDCl}_3$ ):  $\delta$  8.03 (d,  $J = 8.8$  Hz, 2H), 7.32 (dt,  $J = 23.3, 7.8$  Hz, 4H), 7.18 (dd,  $J = 11.2, 8.4$  Hz, 4H), 7.05 (t,  $J = 7.3$  Hz, 1H), 6.86 (t,  $J = 7.3$  Hz, 1H), 6.66 (d,  $J = 7.9$  Hz, 2H), 4.99 (s, 1H), 4.89 (s, 2H), 4.63 (s, 1H), 4.39 (q,  $J = 7.1$  Hz, 2H), 1.42 (t,  $J = 7.1$  Hz, 3H).

$^{13}\text{C}$  NMR (101 MHz,  $\text{CDCl}_3$ )  $\delta$  153.11, 149.8, 144.9, 131.2, 129.4, 122.8, 122.4, 118.9, 115.5, 113.4, 67.9, 66.1, 60.6, 14.5.

### 1-(4-(Methylsulfonyl)phenyl)-2,4-diphenyl-1,2,4-triazolidine (**21**)

The  $^1\text{H}$  and  $^{13}\text{C}$  spectra data matched with values reported in the literature.<sup>11</sup>

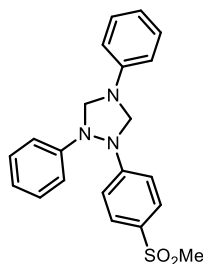

**21**

White solid (51.5 mg, 68% yield); mp: 181.2-183.1 °C;

<sup>1</sup>H NMR (400 MHz, CDCl<sub>3</sub>): δ 7.86 – 7.84 (d, *J* = 8.8 Hz, 2H), 7.36 – 7.32 (t, *J* = 7.9 Hz, 2H), 7.30 – 7.26 (t, *J* = 7.8 Hz, 2H), 7.23 – 7.21 (d, *J* = 8.8 Hz, 2H), 7.16 – 7.14 (d, *J* = 8.2 Hz, 2H), 7.07 – 7.04 (t, *J* = 7.3 Hz, 1H), 6.88 – 6.84 (t, *J* = 7.3 Hz, 1H), 6.67 – 6.65 (d, *J* = 8.1 Hz, 2H), 5.01 (s, 1H), 4.93 – 4.88 (d, *J* = 18.9 Hz, 2H), 4.61 (s, 1H), 3.04 (s, 3H).

<sup>13</sup>C NMR (101 MHz, CDCl<sub>3</sub>): δ 153.4, 149.4, 144.7, 131.6, 129.5, 129.4, 129.1, 122.8, 119.2, 115.6, 113.7, 113.6, 68.3, 65.9, 44.9.

### 1,4-Diphenyl-2-(4-(trifluoromethyl)phenyl)-1,2,4-triazolidine (22)

The <sup>1</sup>H and <sup>13</sup>C spectra data matched with values reported in the literature.<sup>9</sup>

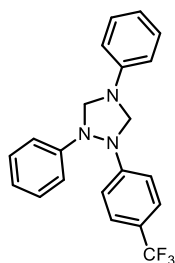

22

Colorless oil (47.0 mg, 64% yield);

<sup>1</sup>H NMR (400 MHz, CDCl<sub>3</sub>): δ 7.56 – 7.54 (d, *J* = 8.6 Hz, 2H), 7.35 – 7.31 (t, *J* = 8.0 Hz, 2H), 7.29 – 7.25 (m, 2H), 7.23 – 7.21 (d, *J* = 8.5 Hz, 2H), 7.18 – 7.16 (d, *J* = 7.8 Hz, 2H), 7.05 – 7.01 (t, *J* = 7.3 Hz, 1H), 6.86 – 6.82 (t, *J* = 7.3 Hz, 1H), 6.65 – 6.63 (m, 2H), 4.97 (s, 1H), 4.86 (s, 2H), 4.65 (s, 1H).

<sup>13</sup>C NMR (101 MHz, CDCl<sub>3</sub>): δ 152.3, 149.7, 144.8, 129.4, 129.3, 126.6 (q, *J* = 4.0 Hz), 124.9 (d, *J* = 271.7 Hz), 122.8, 122.3, 118.9, 115.3, 114.0, 113.4, 67.7, 66.4.

### 4-(2,4-Diphenyl-1,2,4-triazolidin-1-yl)benzotrile (23)

The <sup>1</sup>H and <sup>13</sup>C spectra data matched with values reported in the literature.<sup>11</sup>

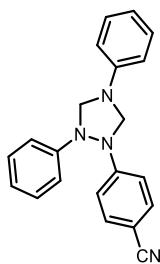

23

White solid (46.0 mg, 71% yield); mp: 144.2-145.1 °C;

$^1\text{H NMR}$  (400 MHz,  $\text{CDCl}_3$ ):  $\delta$  7.58 – 7.56 (d,  $J = 8.8$  Hz, 2H), 7.35 – 7.26 (m, 4H), 7.16 – 7.14 (d,  $J = 8.9$  Hz, 4H), 7.07 – 7.03 (t,  $J = 7.3$  Hz, 1H), 6.88 – 6.84 (t,  $J = 7.4$  Hz, 1H), 6.66 – 6.64 (d,  $J = 7.9$  Hz, 2H), 4.99 (s, 1H), 4.90 – 4.85 (d,  $J = 20.3$  Hz, 2H), 4.59 (s, 1H).

$^{13}\text{C NMR}$  (101 MHz,  $\text{CDCl}_3$ ):  $\delta$  152.5, 149.5, 144.7, 133.6, 129.5, 129.4, 122.7, 119.6, 119.2, 115.6, 114.0, 113.6, 103.2, 68.3, 65.8.

#### 1,4-Diphenyl-2-(*m*-tolyl)-1,2,4-triazolidine(24)

The  $^1\text{H}$  and  $^{13}\text{C}$  spectra data matched with values reported in the literature.<sup>9</sup>

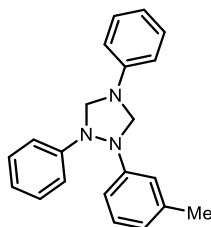

24

White solid (45.4 mg, 72% yield); mp: 110.2-112.7 °C;

$^1\text{H NMR}$  (400 MHz,  $\text{CDCl}_3$ ):  $\delta$  7.34 – 7.30 (t,  $J = 7.8$  Hz, 2H), 7.28 – 7.19 (dq,  $J = 14.2, 7.8, 6.8$  Hz, 5H), 7.05 (s, 1H), 7.02 – 6.97 (m, 2H), 6.82 – 6.79 (t,  $J = 6.8$  Hz, 2H), 6.63 – 6.61 (d,  $J = 8.1$  Hz, 2H), 4.90 (s, 2H), 4.71 (s, 2H), 2.36 (s, 3H).

$^{13}\text{C NMR}$  (101 MHz,  $\text{CDCl}_3$ ):  $\delta$  150.2, 145.1, 139.1, 129.4, 129.2, 129.1, 122.5, 121.5, 118.3, 115.7, 115.1, 115.0, 113.2, 112.2, 67.1, 67.1, 21.8.

### 1,4-diphenyl-2-(*o*-tolyl)-1,2,4-triazolidine (25)

The  $^1\text{H}$  and  $^{13}\text{C}$  spectra data matched with values reported in the literature.<sup>9</sup>

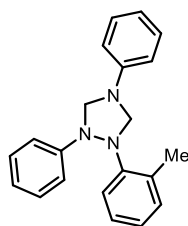

25

White solid (54.2 mg, 86% yield); mp: 104.2-105.5 °C;

$^1\text{H NMR}$  (400 MHz,  $\text{CDCl}_3$ ):  $\delta$  7.31 (dt,  $J = 28.8, 8.4$  Hz, 8H), 7.16 (t,  $J = 7.8$  Hz, 1H), 7.08 (d,  $J = 7.4$  Hz, 1H), 6.98 (t,  $J = 7.3$  Hz, 1H), 6.84 (t,  $J = 7.4$  Hz, 1H), 6.63 (d,  $J = 8.0$  Hz, 2H), 4.93 (s, 2H), 4.64 (s, 2H), 2.54 (s, 3H).

$^{13}\text{C NMR}$  (101 MHz,  $\text{CDCl}_3$ ):  $\delta$  150.1, 149.3, 144.9, 131.3, 130.4, 129.4, 129.2, 129.1, 126.4, 124.2, 121.0, 118.4, 118.2, 115.0, 114.9, 113.1, 68.5, 67.9, 19.1.

### 1-(3,5-Dimethylphenyl)-2,4-diphenyl-1,2,4-triazolidine (26)

The  $^1\text{H}$  and  $^{13}\text{C}$  spectra data matched with values reported in the literature.<sup>10</sup>

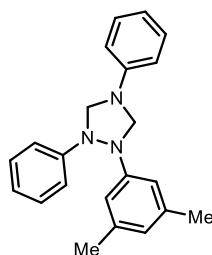

26

Yellow oil (52.0 mg, 79% yield);

$^1\text{H NMR}$  (400 MHz,  $\text{CDCl}_3$ ):  $\delta$  7.34 – 7.20 (ddd,  $J = 33.0, 15.0, 7.4$  Hz, 6H), 7.01 – 6.97 (t,  $J = 7.2$  Hz, 1H), 6.85 (s, 2H), 6.83 – 6.79 (t,  $J = 7.3$  Hz, 1H), 6.65 – 6.6 (m, 3H), 4.90 (s, 2H), 4.72 (s, 2H), 2.32 (s, 6H).

$^{13}\text{C NMR}$  (101 MHz,  $\text{CDCl}_3$ ):  $\delta$  150.2, 145.1, 138.9, 129.3, 129.2, 123.4, 121.4, 118.2,

115.0, 114.9, 113.2, 112.8, 67.1, 67.0, 21.6.

### 1-(3-Fluoro-4-methoxyphenyl)-2,4-diphenyl-1,2,4-triazolidine(27)

The  $^1\text{H}$  and  $^{13}\text{C}$  spectra data matched with values reported in the literature.<sup>10</sup>

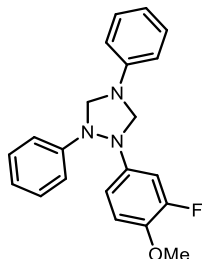

27

White solid (52.2 mg, 75% yield); mp: 67.4-69.1 °C;

$^1\text{H}$  NMR (400 MHz,  $\text{CDCl}_3$ ):  $\delta$  7.34 – 7.24 (m, 4H), 7.19 – 7.17 (d,  $J = 7.8$  Hz, 2H), 7.07 – 7.03 (d,  $J = 13.0$  Hz, 1H), 7.00 – 6.97 (t,  $J = 7.3$  Hz, 1H), 6.94 – 6.87 (q,  $J = 11.4, 10.1$  Hz, 2H), 6.83 – 6.80 (t,  $J = 7.3$  Hz, 1H), 6.62 – 6.61 (d,  $J = 7.8$  Hz, 2H), 4.82 – 4.77 (d,  $J = 19.7$  Hz, 3H), 4.63 (s, 1H), 3.86 (s, 3H).

$^{13}\text{C}$  NMR (101 MHz,  $\text{CDCl}_3$ ):  $\delta$  153.2 (d,  $J = 252.5$  Hz), 149.9, 144.9 (d,  $J = 8.1$  Hz), 144.8, 142.6 (d,  $J = 11.1$  Hz), 129.4, 129.2, 121.6, 118.5, 114.9, 114.7 (d,  $J = 3.0$  Hz), 113.3, 110.6 (d,  $J = 3.0$  Hz), 104.8 (d,  $J = 22.2$  Hz), 67.7, 67.2, 57.0.

### 1-(2,3-Dihydro-1H-inden-5-yl)-2,4-diphenyl-1,2,4-triazolidine (28)

The  $^1\text{H}$  and  $^{13}\text{C}$  spectra data matched with values reported in the literature.<sup>10</sup>

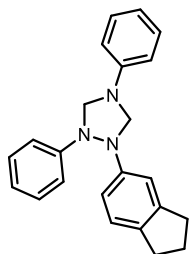

28

Yellow oil (60.0 mg, 88% yield);

$^1\text{H}$  NMR (400 MHz,  $\text{CDCl}_3$ ):  $\delta$  7.35 – 7.31 (t,  $J = 7.7$  Hz, 2H), 7.29 – 7.27 (d,  $J = 7.3$

Hz, 1H), 7.23 – 7.21 (d,  $J = 8.1$  Hz, 3H), 7.19 – 7.15 (m, 2H), 7.03 – 6.99 (m, 2H), 6.83 – 6.80 (d,  $J = 7.2$  Hz, 1H), 6.64 – 6.62 (d,  $J = 7.9$  Hz, 2H), 4.90 (s, 2H), 4.79 – 4.68 (d,  $J = 43.4$  Hz, 2H), 2.94 – 2.87 (dt,  $J = 13.9, 7.2$  Hz, 4H), 2.14 – 2.07 (p,  $J = 7.2$  Hz, 2H).

$^{13}\text{C}$  NMR (101 MHz,  $\text{CDCl}_3$ ):  $\delta$  150.2, 149.0, 145.5, 145.2, 137.7, 129.4, 129.2, 124.7, 121.3, 118.3, 114.8, 113.5, 113.3, 111.5, 67.7, 66.9, 33.2, 32.1, 25.8.

### 5-(2,4-Diphenyl-1,2,4-triazolidin-1-yl)benzo[d]thiazole (29)

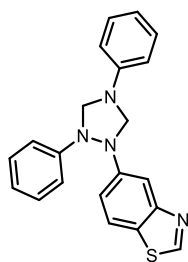

29

Yellow oil (43.0 mg, 60% yield);

$^1\text{H}$  NMR (400 MHz,  $\text{CDCl}_3$ ):  $\delta$  8.98 (s, 1H), 7.98 (s, 1H), 7.86 – 7.84 (d,  $J = 8.8$  Hz, 1H), 7.41 – 7.38 (d,  $J = 10.8$  Hz, 1H), 7.35 – 7.31 (t,  $J = 7.8$  Hz, 2H), 7.28 – 7.24 (m, 4H), 7.02 – 6.98 (t,  $J = 7.2$  Hz, 1H), 6.83 – 6.79 (t,  $J = 7.4$  Hz, 1H), 6.65 – 6.63 (d,  $J = 8.2$  Hz, 2H), 4.92 (s, 2H), 4.80 (s, 2H).

$^{13}\text{C}$  NMR (101 MHz,  $\text{CDCl}_3$ ):  $\delta$  155.0, 154.5, 149.9, 149.6, 145.0, 129.4, 129.2, 126.6, 122.1, 121.7, 118.6, 115.1, 115.0, 113.4, 108.9, 67.7, 67.4.

HRMS (ESI): Calcd. for  $\text{C}_{21}\text{H}_{18}\text{KN}_4\text{S}^+$  [ $\text{M} + \text{K}$ ] $^+$  397.0884, found 397.0967.

### 6-(2,4-Diphenyl-1,2,4-triazolidin-1-yl)-3,4-dihydronaphthalen-1(2H)-one (30)

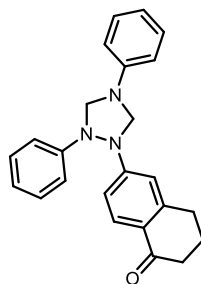

30

Yellow oil (44.3 mg, 60% yield);

$^1\text{H NMR}$  (400 MHz,  $\text{CDCl}_3$ ):  $\delta$  8.03 – 8.01 (d,  $J = 8.7$  Hz, 1H), 7.35 – 7.31 (t,  $J = 7.9$  Hz, 2H), 7.29 – 7.25 (m, 2H), 7.17 – 7.15 (d,  $J = 7.9$  Hz, 2H), 7.06 – 7.01 (q,  $J = 7.1$  Hz, 2H), 6.94 (s, 1H), 6.86 – 6.83 (t,  $J = 7.3$  Hz, 1H), 6.66 – 6.64 (d,  $J = 7.9$  Hz, 2H), 4.99 (s, 1H), 4.88 (s, 2H), 4.59 (s, 1H), 2.94 – 2.91 (t,  $J = 5.8$  Hz, 2H), 2.63 – 2.60 (t,  $J = 6.4$  Hz, 2H), 2.15 – 2.09 (p,  $J = 6.2$  Hz, 2H).

$^{13}\text{C NMR}$  (101 MHz,  $\text{CDCl}_3$ ):  $\delta$  197.1, 153.1, 149.7, 146.6, 144.8, 129.5, 129.4, 129.3, 126.1, 122.4, 118.9, 115.4, 113.4, 112.3, 112.2, 68.0, 65.7, 38.9, 30.2, 23.3.

**HRMS (ESI)**: Calcd. for  $\text{C}_{24}\text{H}_{23}\text{N}_3\text{NaO}^+$   $[\text{M} + \text{Na}]^+$  392.1733, found 392.1764.

### 1,2-Diphenyl-4-(*p*-tolyl)-1,2,4-triazolidine (31)

The  $^1\text{H}$  and  $^{13}\text{C}$  spectra data matched with values reported in the literature.<sup>10</sup>

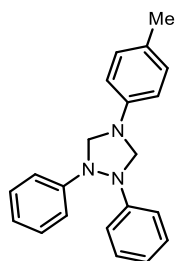

31

White solid (56.8 mg, 90% yield); mp: 94.2-96.1 °C;

$^1\text{H NMR}$  (400 MHz,  $\text{CDCl}_3$ ):  $\delta$  7.33 – 7.29 (m, 4H), 7.10 – 7.18 (d,  $J = 7.8$  Hz, 4H), 7.08 – 7.06 (d,  $J = 8.2$  Hz, 2H), 7.00 – 6.96 (t,  $J = 7.3$  Hz, 2H), 6.57 – 6.55 (d,  $J = 8.4$  Hz, 2H), 4.86 (s, 2H), 4.70 (s, 2H), 2.27 (s, 3H).

$^{13}\text{C NMR}$  (101 MHz,  $\text{CDCl}_3$ ):  $\delta$  150.2, 143.2, 130.3, 129.2, 127.4, 121.5, 115.0, 113.6, 67.6, 20.4.

### 4-(4-Methoxyphenyl)-1,2-diphenyl-1,2,4-triazolidine (32)

The  $^1\text{H}$  and  $^{13}\text{C}$  spectra data matched with values reported in the literature.<sup>10</sup>

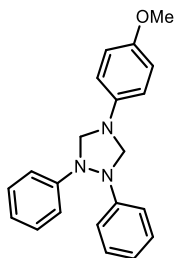

32

White solid (47.1 mg, 71% yield); mp: 72.9-74.1 °C;

$^1\text{H NMR}$  (400 MHz,  $\text{CDCl}_3$ ):  $\delta$  7.32 – 7.29 (m, 4H), 7.18 – 7.16 (d,  $J = 7.7$  Hz, 4H), 6.99 – 6.95 (t,  $J = 6.7$  Hz, 2H), 6.84 – 6.82 (d,  $J = 6.8$  Hz, 2H), 6.63 – 6.61 (m, 2H), 4.82 (s, 2H), 4.71 (s, 2H), 3.76 (s, 3H).

$^{13}\text{C NMR}$  (101 MHz,  $\text{CDCl}_3$ ):  $\delta$  152.9, 150.3, 139.9, 129.1, 121.4, 115.32 – 114.61 (m), 68.4, 55.7.

#### 4-(4-Fluorophenyl)-1,2-diphenyl-1,2,4-triazolidine (33)

The  $^1\text{H}$  and  $^{13}\text{C}$  spectra data matched with values reported in the literature.<sup>10</sup>

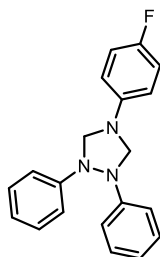

33

White solid (51.6 mg, 81% yield); mp: 113.7-115.1 °C;

$^1\text{H NMR}$  (400 MHz,  $\text{CDCl}_3$ ):  $\delta$  7.35 – 7.29 (t,  $J = 7.8$  Hz, 4H), 7.21 – 7.19 (d,  $J = 8.3$  Hz, 4H), 7.02 – 6.95 (m, 4H), 6.59 – 6.56 (m, 2H), 4.84 (s, 2H), 4.71 (s, 2H).

$^{13}\text{C NMR}$  (101 MHz,  $\text{CDCl}_3$ ):  $\delta$  157.6 (d,  $J = 238.4$  Hz), 150.1, 142.0 (d,  $J = 4.0$  Hz), 129.2, 121.6, 116.0 (d,  $J = 22.2$  Hz), 115.0, 114.5 (d,  $J = 7.1$  Hz), 67.9.

#### 4-(4-Chlorophenyl)-1,2-diphenyl-1,2,4-triazolidine (34)

The  $^1\text{H}$  and  $^{13}\text{C}$  spectra data matched with values reported in the literature.<sup>10</sup>

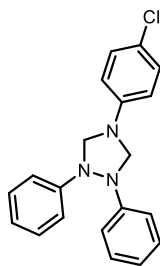

34

White solid (54.8 mg, 82% yield); mp: 132.2-133.8 °C;

$^1\text{H NMR}$  (400 MHz,  $\text{CDCl}_3$ ):  $\delta$  7.35 – 7.31 (m, 5H), 7.24 – 7.19 (t,  $J = 9.2$  Hz, 5H), 7.04 – 7.00 (m, 2H), 6.57 – 6.52 (t,  $J = 9.4$  Hz, 2H), 4.88 (s, 2H), 4.71 (s, 2H).

$^{13}\text{C NMR}$  (101 MHz,  $\text{CDCl}_3$ ):  $\delta$  149.9, 143.6, 129.3, 129.2, 121.7, 115.0, 114.3, 67.1.

#### 4-(4-Bromophenyl)-1,2-diphenyl-1,2,4-triazolidine (35)

The  $^1\text{H}$  and  $^{13}\text{C}$  spectra data matched with values reported in the literature.<sup>10</sup>

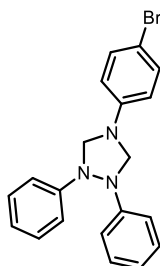

35

White solid (54.6 mg, 72% yield); mp: 138.2-139.7 °C;

$^1\text{H NMR}$  (400 MHz,  $\text{CDCl}_3$ ):  $\delta$  7.35 – 7.29 (m, 6H), 7.22 – 7.20 (d,  $J = 8.0$  Hz, 4H), 7.02 – 6.99 (t,  $J = 7.2$  Hz, 2H), 6.49 – 6.47 (d,  $J = 8.4$  Hz, 2H), 4.86 (s, 2H), 4.68 (s, 2H).

$^{13}\text{C NMR}$  (101 MHz,  $\text{CDCl}_3$ ):  $\delta$  149.9, 143.9, 132.1, 129.2, 121.7, 115.0, 114.7, 110.3, 67.0.

#### 4-(4-Benzylphenyl)-1,2-diphenyl-1,2,4-triazolidine (36)

The  $^1\text{H}$  and  $^{13}\text{C}$  spectra data matched with values reported in the literature.<sup>10</sup>

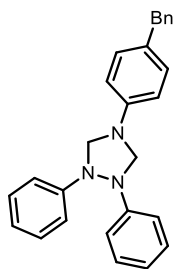

36

Yellow oil (54.7 mg, 70% yield);

$^1\text{H NMR}$  (400 MHz,  $\text{CDCl}_3$ ):  $\delta$  7.33 – 7.27 (q,  $J = 7.8, 7.4$  Hz, 6H), 7.20 – 7.16 (m, 7H), 7.09 – 7.07 (d,  $J = 8.3$  Hz, 2H), 7.00 – 6.97 (t,  $J = 7.2$  Hz, 2H), 6.58 – 6.56 (d,  $J = 8.3$  Hz, 2H), 4.87 (s, 2H), 4.70 (s, 2H), 3.91 (s, 2H).

$^{13}\text{C NMR}$  (101 MHz,  $\text{CDCl}_3$ ):  $\delta$  150.2, 143.6, 141.8, 131.1, 129.9, 129.2, 128.8, 128.5, 126.0, 121.6, 115.0, 113.6, 67.4, 41.0.

#### 4-([1,1'-Biphenyl]-4-yl)-1,2-diphenyl-1,2,4-triazolidine (37)

The  $^1\text{H}$  and  $^{13}\text{C}$  spectra data matched with values reported in the literature.<sup>10</sup>

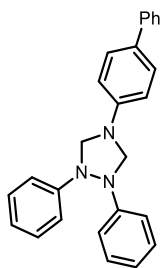

37

White solid (53.5 mg, 71% yield); mp: 113.8-115.6 °C;

$^1\text{H NMR}$  (400 MHz,  $\text{CDCl}_3$ ):  $\delta$  7.57 – 7.51 (dd,  $J = 15.2, 8.0$  Hz, 4H), 7.45 – 7.41 (t,  $J = 7.6$  Hz, 2H), 7.35 – 7.31 (t,  $J = 7.8$  Hz, 5H), 7.24 – 7.22 (d,  $J = 8.0$  Hz, 4H), 7.02 – 6.98 (t,  $J = 7.2$  Hz, 2H), 6.70 – 6.68 (d,  $J = 8.5$  Hz, 2H), 4.95 (s, 2H), 4.76 (s, 2H).

$^{13}\text{C NMR}$  (101 MHz,  $\text{CDCl}_3$ ):  $\delta$  150.0, 144.3, 140.8, 131.2, 129.2, 128.7, 128.0, 126.4, 121.6, 115.0, 114.1, 113.5, 67.0.

#### 4-(3-Fluoro-4-methoxyphenyl)-1,2-diphenyl-1,2,4-triazolidine (38)

The  $^1\text{H}$  and  $^{13}\text{C}$  spectra data matched with values reported in the literature.<sup>10</sup>

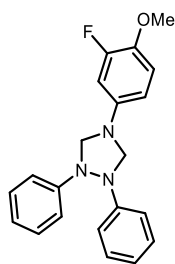

38

Yellow oil (52.3 mg, 75% yield);

$^1\text{H NMR}$  (400 MHz,  $\text{CDCl}_3$ ):  $\delta$  7.34 – 7.29 (m, 4H), 7.19 – 7.17 (d,  $J = 7.9$  Hz, 4H), 7.01 – 6.97 (t,  $J = 7.3$  Hz, 2H), 6.91 – 6.86 (t,  $J = 9.1$  Hz, 1H), 6.46 – 6.42 (d,  $J = 13.2$  Hz, 1H), 6.33 – 6.31 (d,  $J = 8.8$  Hz, 1H), 4.81 (s, 2H), 4.67 (s, 2H), 3.84 (s, 3H).

$^{13}\text{C NMR}$  (101 MHz,  $\text{CDCl}_3$ ):  $\delta$  154.4 (d,  $J = 246.4$  Hz), 150.0, 140.4, 140.3 (d,  $J = 8.1$  Hz), 129.2 (d,  $J = 11.1$  Hz), 122.8, 121.6, 115.7 (d,  $J = 4.0$  Hz), 114.9, 108.7 (d,  $J = 4.0$  Hz), 102.9 (d,  $J = 23.2$  Hz), 77.2, 67.9, 57.3.

#### Procedure for gram-scale experiment (Procedure B):

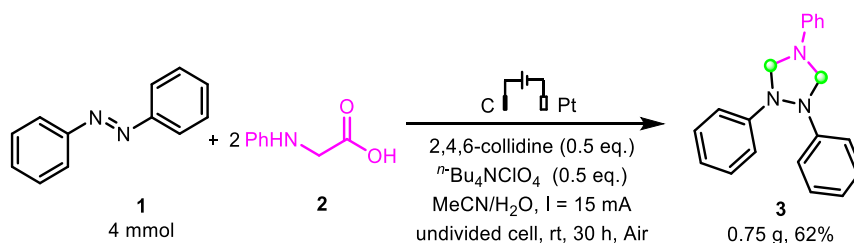

To a 50 mL distillation flask equipped with a magnetic stirring rod, azobenzene **1** (0.73 g, 4 mmol, 1.0 eq.), *N*-phenyl glycine **2** (2.4 g, 16 mmol, 4.0 eq.), 2,4,6-collidine (0.24 g, 2 mmol, 0.5 eq.),  $n\text{-Bu}_4\text{NClO}_4$  (0.68 g, 2 mmol, 0.5 eq.),  $\text{CH}_3\text{CN}$  (15 mL) and  $\text{H}_2\text{O}$  (2.5 mL) were added. The flask was equipped with a graphite rod anode ( $d = 5$  mm) and a platinum cathode. The resulting solution was stirred and electrolyzed at a constant current of 15 mA (Single Output DC Power Supply: KRP-305DM, the voltage range is 1.9 V - 3.3 V) for 30 h at room temperature. The solution was diluted with EtOAc (20 mL) and brine (20 mL) and extracted with EtOAc ( $3 \times 30$  mL). The combined organic

layers were washed with brine ( $3 \times 20$  mL), dried with  $\text{Na}_2\text{SO}_4$ , and concentrated in vacuo. Purification by flash column chromatography using PE/EtOAc ( $v/v = 100/1$ ) as eluent afforded the desired product **3** (0.75 g, 62%).

## V. Mechanism Research

### 5.1 Radical-trapping experiments.

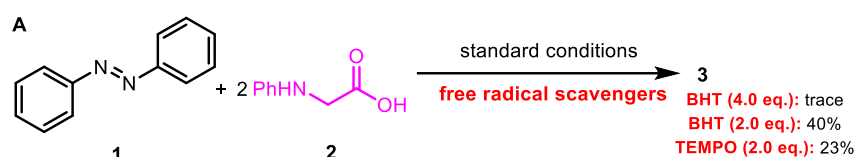

To a 10 mL distillation flask equipped with a magnetic stirring rod, azobenzene **1** (36.5 mg, 0.2 mmol, 1.0 eq.), *N*-phenyl glycine **2** (121 mg, 0.8 mmol, 4.0 eq.), BHT (176 mg, 0.8 mmol, 4.0 eq.), 2,4,6-collidine (12.1 mg, 0.04 mmol, 0.5 eq.),  $n$ -Bu<sub>4</sub>NClO<sub>4</sub> (103 mg, 0.3 mmol, 1.5 eq.), H<sub>2</sub>O (0.5 mL) and CH<sub>3</sub>CN (3.0 mL) were added. The flask was equipped with a graphite rod anode (d = 5 mm) and a platinum cathode. The resulting solution was stirred and electrolyzed at a constant current of 10 mA (Single Output DC Power Supply: KRP-305DM, the voltage range is 2.1 V – 3.2 V) for 5 h at room temperature. The solution was diluted with EtOAc (5 mL) and brine (20 mL) and extracted with EtOAc (3 × 20 mL). The combined organic layers were washed with brine (3 × 20 mL), dried with Na<sub>2</sub>SO<sub>4</sub>, and concentrated *in vacuo*. Purification by flash column chromatography using PE/EtOAc (v/v = 100/1) as eluent afforded the desired product **3** (trace) and recovery of starting materials **1** (32.9 mg, 90%).

When the reaction was conducted with BHT (2.0 eq.) as the radical scavenger, the yield of **3** decreased to 40%. Similarly, upon employing TEMPO (2.0 eq.) as an alternative radical scavenger, the yield of **3** further dropped to 23%, indicating significant inhibition of the electrochemical decarboxylative cyclization reaction.

### 5.2 1,2-Diphenylhydrazine experiment.

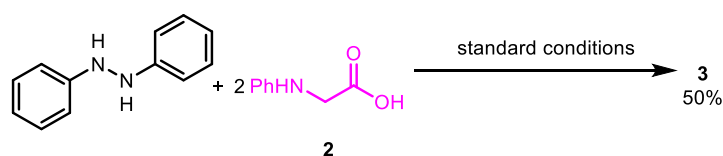

To a 10 mL distillation flask equipped with a magnetic stirring rod, 1,2-diphenylhydrazine (36.8 mg, 0.2 mmol, 1.0 eq.), *N*-phenyl glycine **2** (121 mg, 0.8 mmol,

4.0 eq.), 2,4,6-collidine (12.1 mg, 0.04 mmol, 0.5 eq.), *n*-Bu<sub>4</sub>NClO<sub>4</sub> (103 mg, 0.3 mmol, 1.5 eq.), H<sub>2</sub>O (0.5 mL) and CH<sub>3</sub>CN (3.0 mL) were added. The flask was equipped with a graphite rod anode (d = 5 mm) and a platinum cathode. The resulting solution was stirred and electrolyzed at a constant current of 10 mA (Single Output DC Power Supply: KRP-305DM, the voltage range is 2.3 V – 3.6 V) for 5 h at room temperature. The solution was diluted with EtOAc (5 mL) and brine (20 mL) and extracted with EtOAc (3 × 20 mL). The combined organic layers were washed with brine (3 × 20 mL), dried with Na<sub>2</sub>SO<sub>4</sub>, and concentrated *in vacuo*. Purification by flash column chromatography using PE/EtOAc (v/v = 100/1) as eluent afforded the desired product **3** (30.0 mg, 50%).

### 5.3 Cyclic voltammetry experiments.

Cyclic voltammetry (CV) measurements were performed on a conventional three-electrode electrochemical workstation at room temperature (Fig.S2). A glassy carbon electrode was employed as the working electrode, an Ag/AgCl electrode served as the reference electrode, and a platinum wire was used as the counter electrode. All CV tests were carried out under the optimized standard reaction conditions, with deionized water added as the proton source, and the potential scanning range was set from 0 to 3.0 V vs. Ag/AgCl at a scan rate of 100 mV · s<sup>-1</sup>. The cyclic voltammograms recorded in MeCN with 0.1 M *n*-Bu<sub>4</sub>NBF<sub>4</sub> as the supporting electrolyte [**2** (0.01 mM), **3** (0.01 mM), H<sub>2</sub>O (0.01 mM), **2**+H<sub>2</sub>O (0.01 mM), **3**+H<sub>2</sub>O (0.01 mM)].

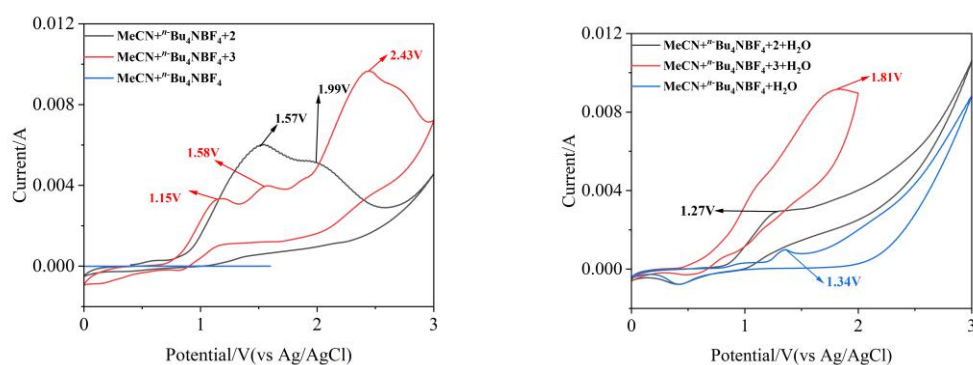

Fig.S2 Cyclic voltammetry experiments

## VI. References

- 1 S. Ning, L. Zheng, Y. Bai, S.-T. Wang, S.-Y. Wang, L. Shi, Q. Gao, X. Che, Z. Zhang and J. Xiang, Highly selective electroreductive linear dimerization of electron-deficient vinylarenes, *Tetrahedron*, 2021, **102**, 132535.
- 2 C. Zhang and N. Jiao, Copper-catalyzed aerobic oxidative dehydrogenative coupling of anilines leading to aromatic azo compounds using dioxygen as an oxidant, *Angew. Chem. Int. Ed.*, 2010, **49**, 6174–6177.
- 3 L. Wang, A. Ishida, Y. Hashidoko and M. Hashimoto, Dehydrogenation of the NH–NH bond triggered by potassium *tert*-butoxide in liquid ammonia, *Angew. Chem. Int. Ed.*, 2016, **56**, 870–873.
- 4 H. Lv, R. D. Laishram, Y. Yang, J. Li, D. Xu, Y. Zhan, Y. Luo, Z. Su, S. More and B. Fan, TEMPO catalyzed oxidative dehydrogenation of hydrazobenzenes to azobenzenes, *Org. Biomol. Chem.*, 2020, **18**, 3471–3474.
- 5 J. H. Griwatz, A. Kunz and H. A. Wegner, Continuous flow synthesis of azobenzenes via Baeyer–Mills reaction, *Beilstein J. Org. Chem.*, 2022, **18**, 781–787.
- 6 Z.-Q. Wang, J.-X. Yu, S.-Q. Bai, B. Liu, C.-Y. Wang and J.-H. Li, Oxidative dehydrogenation of hydrazobenzenes toward azo compounds catalyzed by *tert*-butyl nitrite in EtOH, *ACS Omega*, 2020, **5**, 28856–28862.
- 7 M. A. Rahim, P. N. P. Rao and E. E. Knaus. Synthesis of 4-alkyl-1,2-diphenyl-3,5-dioxypyrazolidines possessing aryl methylsulfonyl and sulfonamide pharmacophores for evaluation as selective cyclooxygenase-2 (COX-2) inhibitors, *J. Heterocycl. Chem.*, 2002, **39**, 1309–1314.
- 8 J. Wang, J. He, C. Zhi, B. Luo, X. Li, Y. Pan, X. Cao and H. Gu. Highly efficient synthesis of azos catalyzed by the common metal copper (0) through oxidative coupling reactions, *RSC Adv.*, 2014, **4**, 16607.
- 9 C. Li, Q. Zhong, S. Tang, L. Wang, P. Li and H. Li, Electrochemical formal [3 + 2] cycloaddition of azobenzenes with hexahydro-1,3,5-triazines, *Org. Chem. Front.*,

2022, **9**, 3769–3774.

- 10 J. Wen, J. Ma, K. Yan, X. Zhang, K. Huang, L. Wu, D. Li and J. Yang, Electrochemical silver-catalyzed [2 + 2 + 1] decarboxylation of *N*-aryl glycines with azobenzenes access to 1,2,4-triazolidines, *ACS Sustainable Chem. Eng.*, 2023, **11**, 16785–16792.
- 11 J. Yang, M. Song, H. Zhou, Y. Qi, B. Ma and X.-C. Wang, Visible-light-promoted decarboxylative addition cyclization of *N*-aryl glycines and azobenzenes to access 1,2,4-triazolidines, *Green Chem.*, 2021, **23**, 5806–5811.

## VII. Spectra

$^1\text{H}$  NMR (400 MHz,  $\text{CDCl}_3$ ):

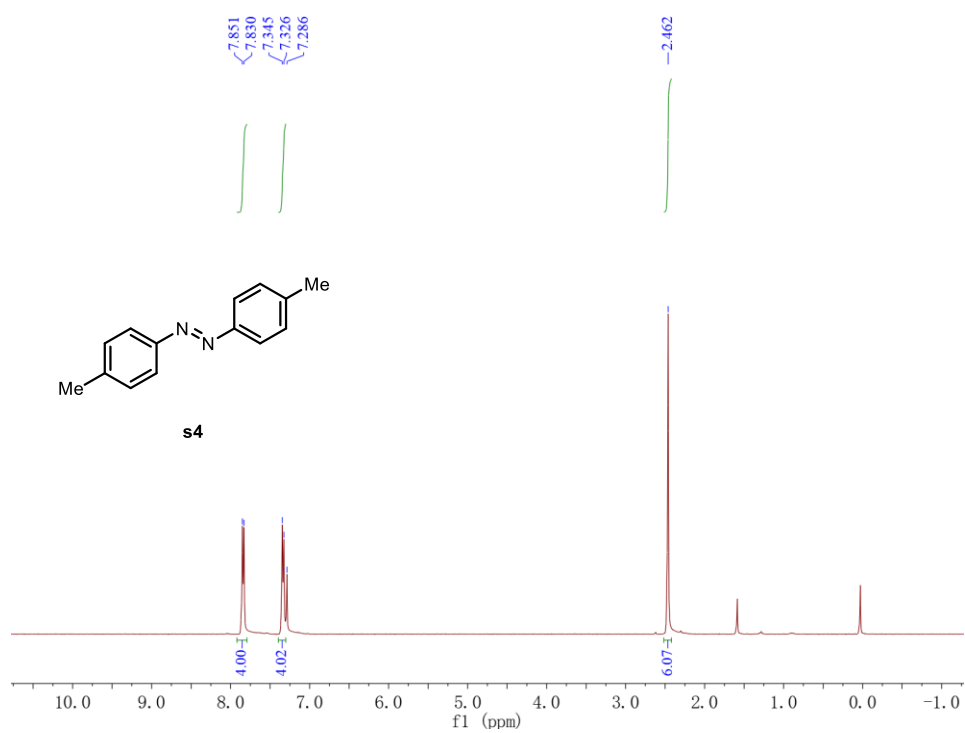

$^1\text{H}$  NMR (400 MHz,  $\text{CDCl}_3$ ):

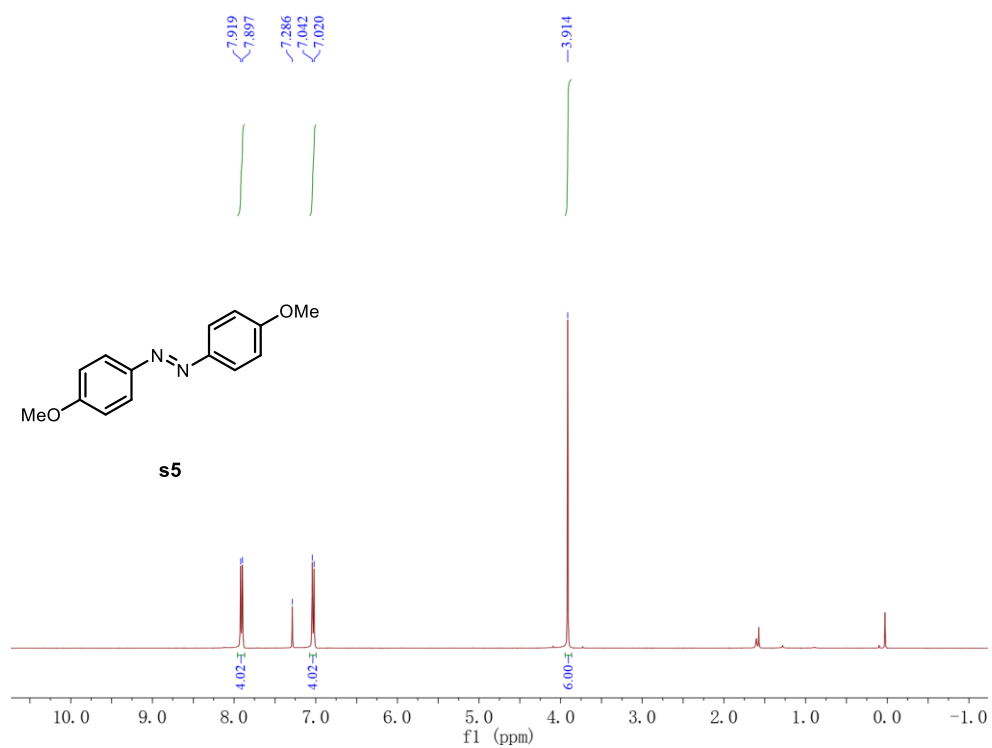

**<sup>1</sup>H NMR (400 MHz, CDCl<sub>3</sub>):**

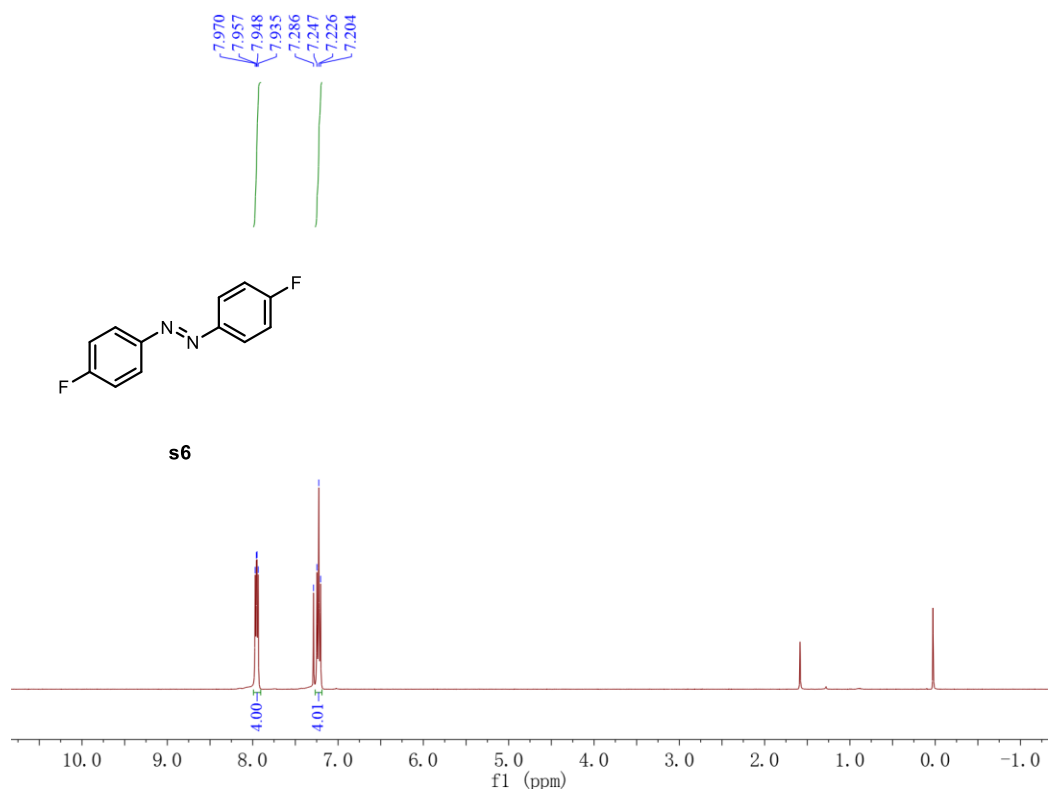

**<sup>1</sup>H NMR (400 MHz, CDCl<sub>3</sub>):**

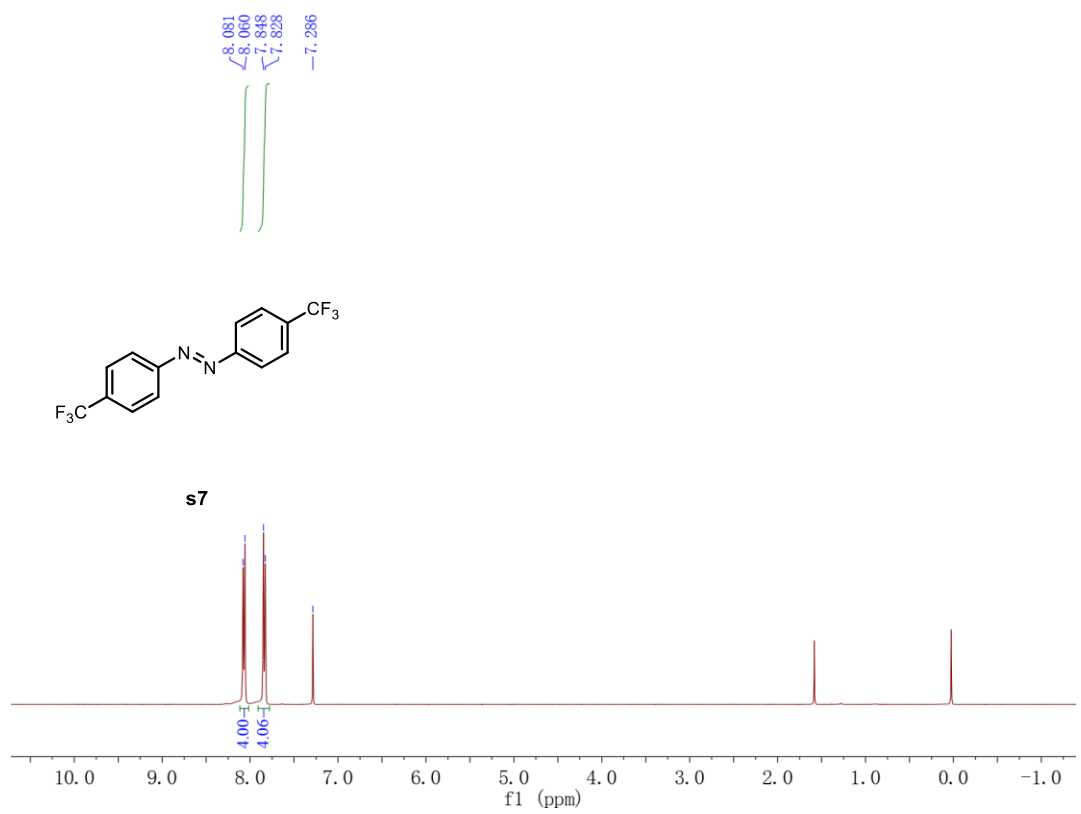

**<sup>1</sup>H NMR (400 MHz, CDCl<sub>3</sub>):**

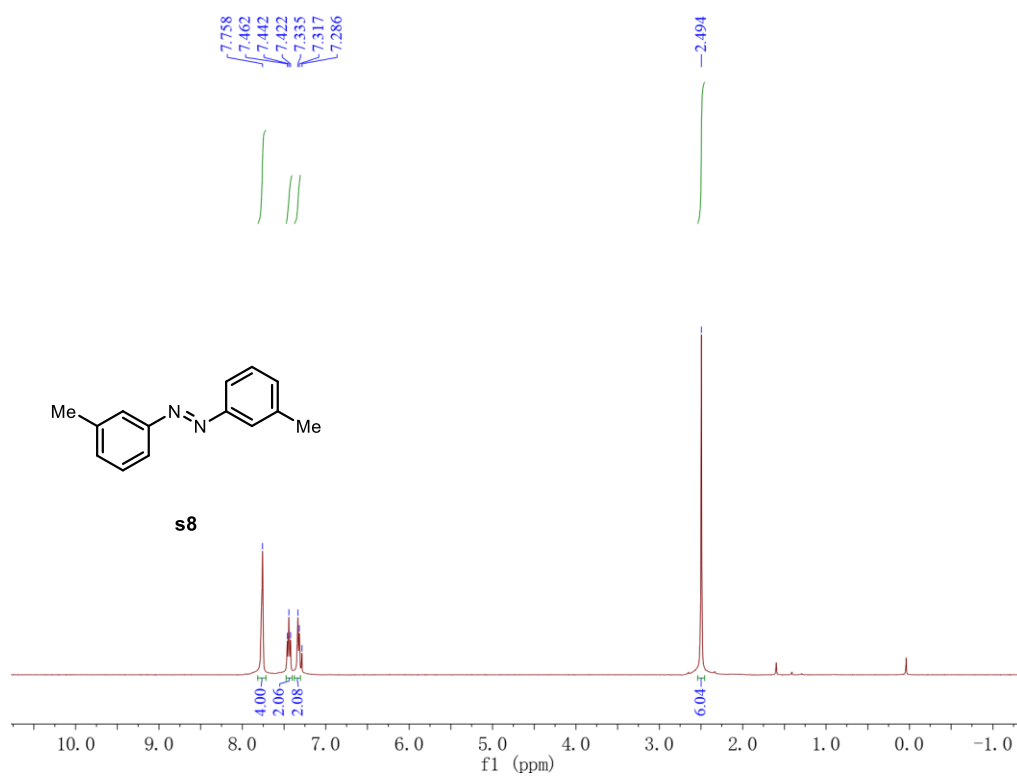

**<sup>1</sup>H NMR (400 MHz, CDCl<sub>3</sub>):**

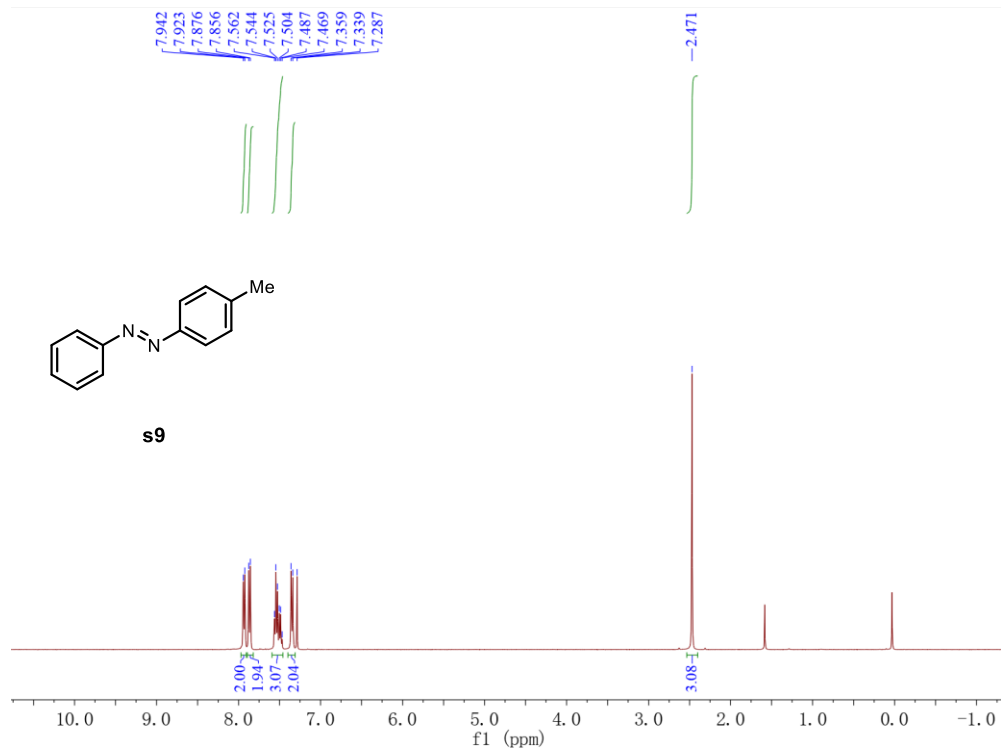

**<sup>1</sup>H NMR (400 MHz, CDCl<sub>3</sub>):**

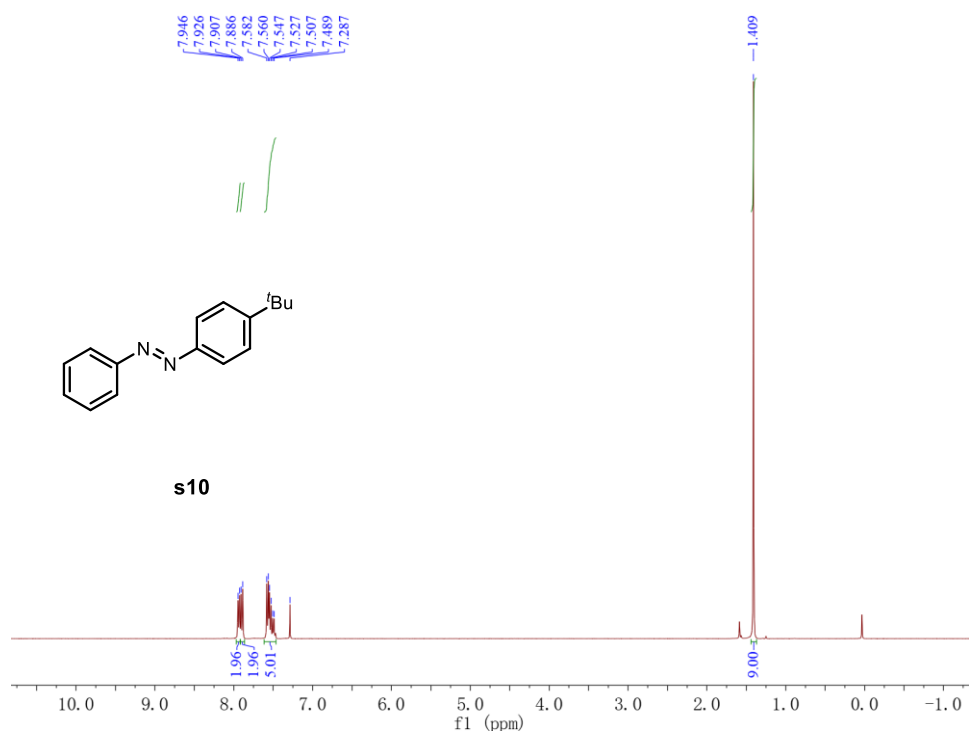

**<sup>1</sup>H NMR (400 MHz, CDCl<sub>3</sub>):**

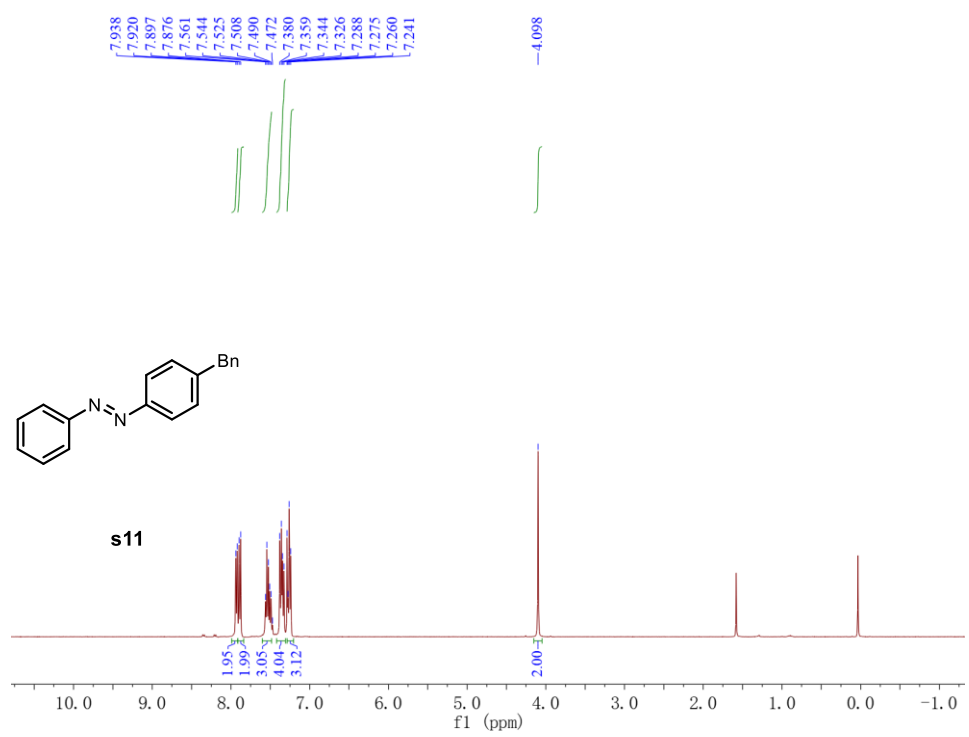

**<sup>1</sup>H NMR (400 MHz, CDCl<sub>3</sub>):**

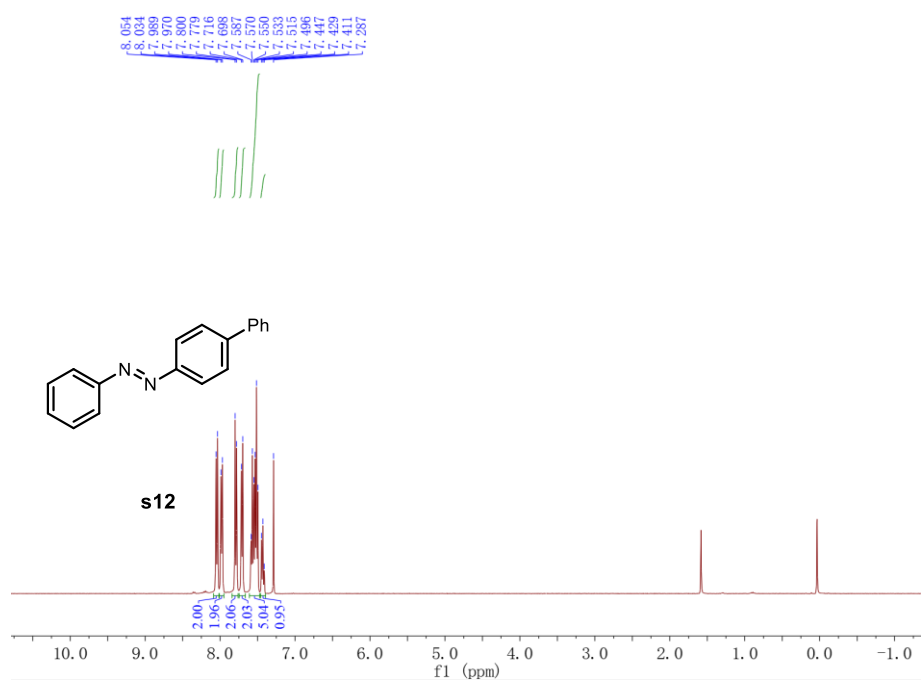

**<sup>1</sup>H NMR (400 MHz, CDCl<sub>3</sub>):**

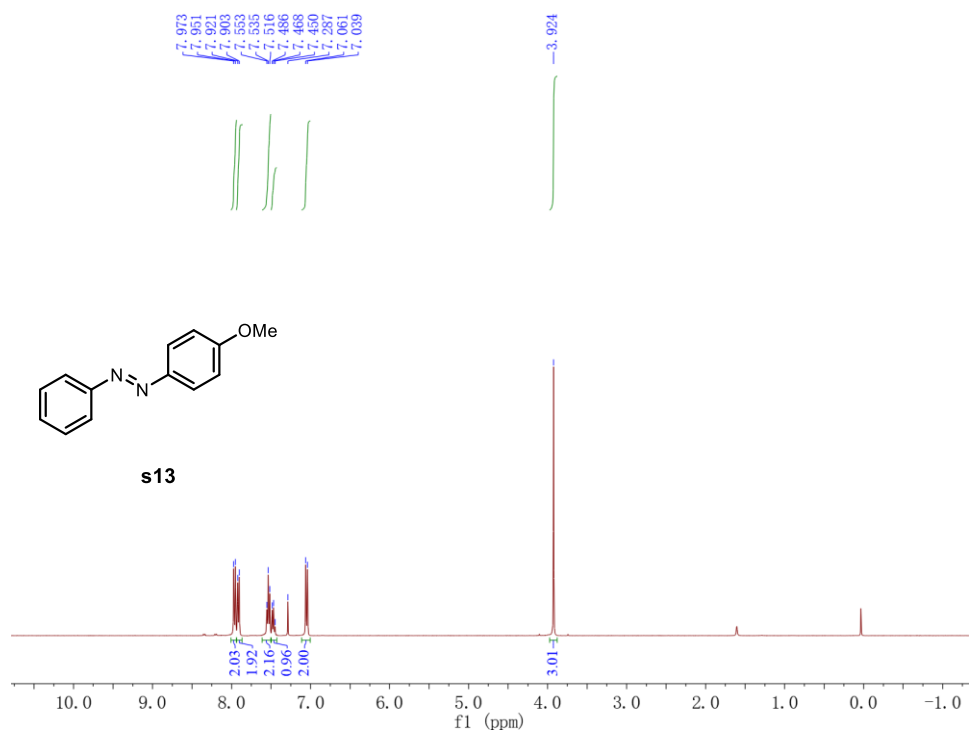

**<sup>1</sup>H NMR (400 MHz, CDCl<sub>3</sub>):**

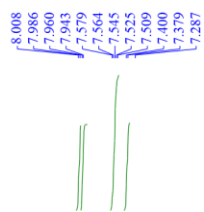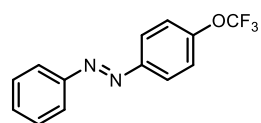

**s14**

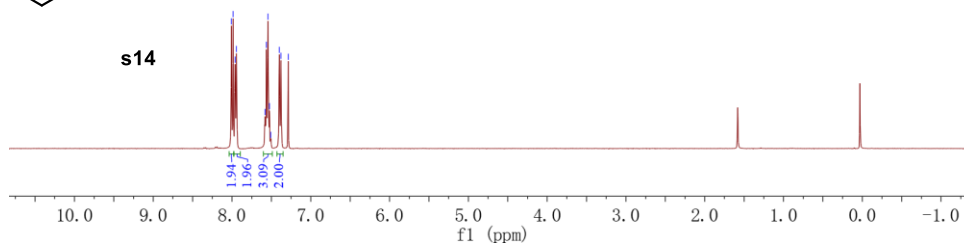

**<sup>1</sup>H NMR (400 MHz, CDCl<sub>3</sub>):**

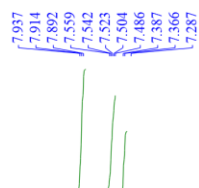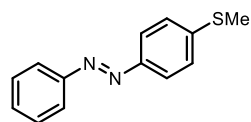

**s15**

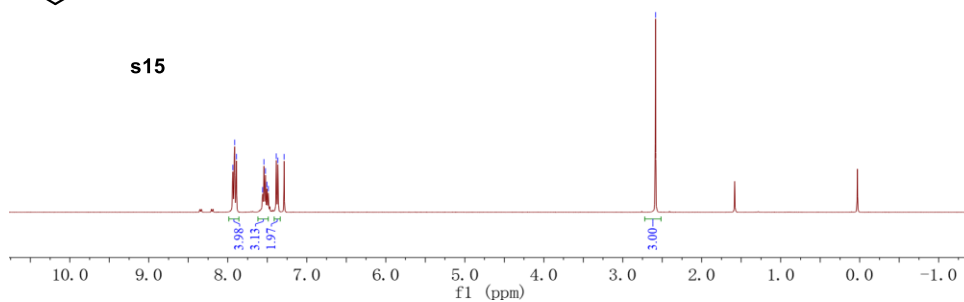

**<sup>1</sup>H NMR (400 MHz, CDCl<sub>3</sub>):**

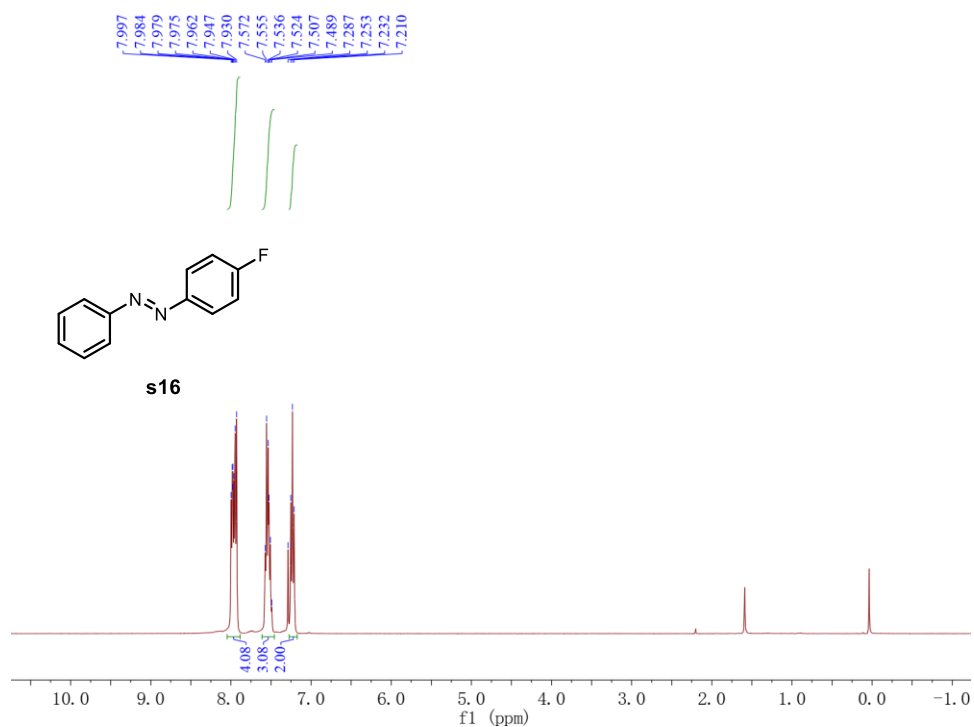

**<sup>1</sup>H NMR (400 MHz, CDCl<sub>3</sub>):**

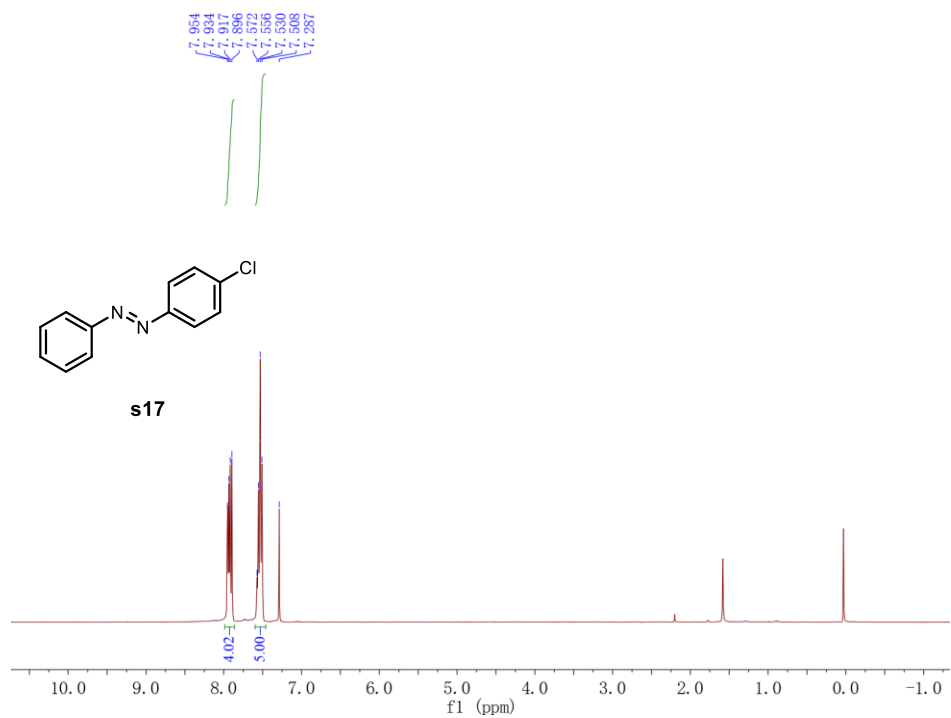

**<sup>1</sup>H NMR (400 MHz, CDCl<sub>3</sub>):**

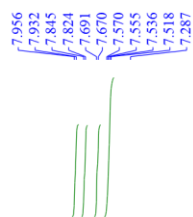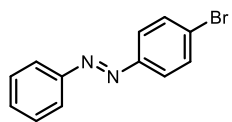

**s18**

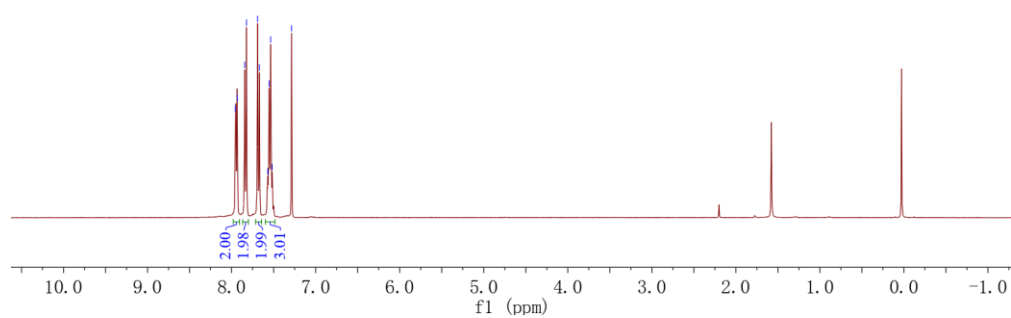

**<sup>1</sup>H NMR (400 MHz, CDCl<sub>3</sub>):**

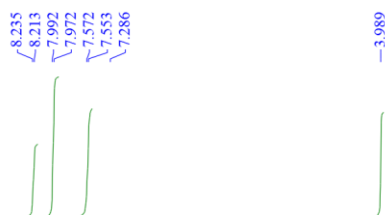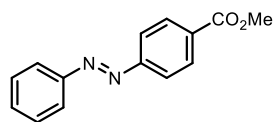

**s19**

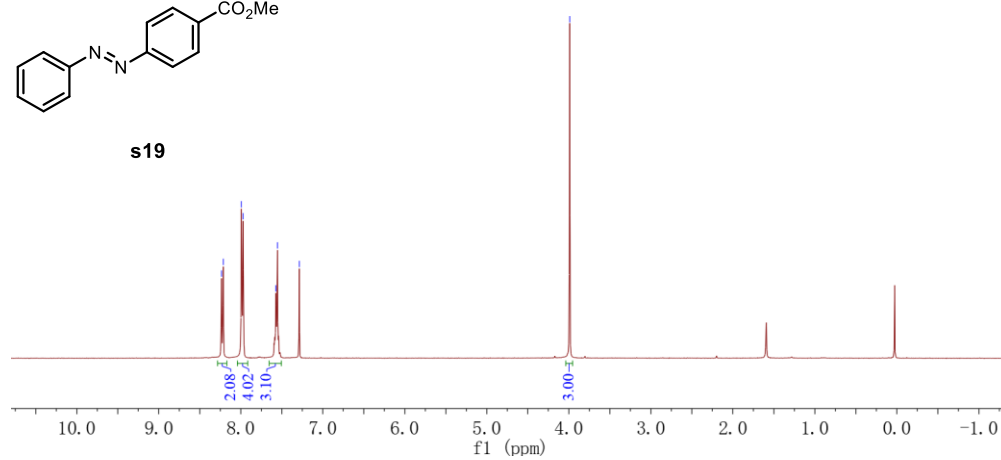

**<sup>1</sup>H NMR (400 MHz, CDCl<sub>3</sub>):**

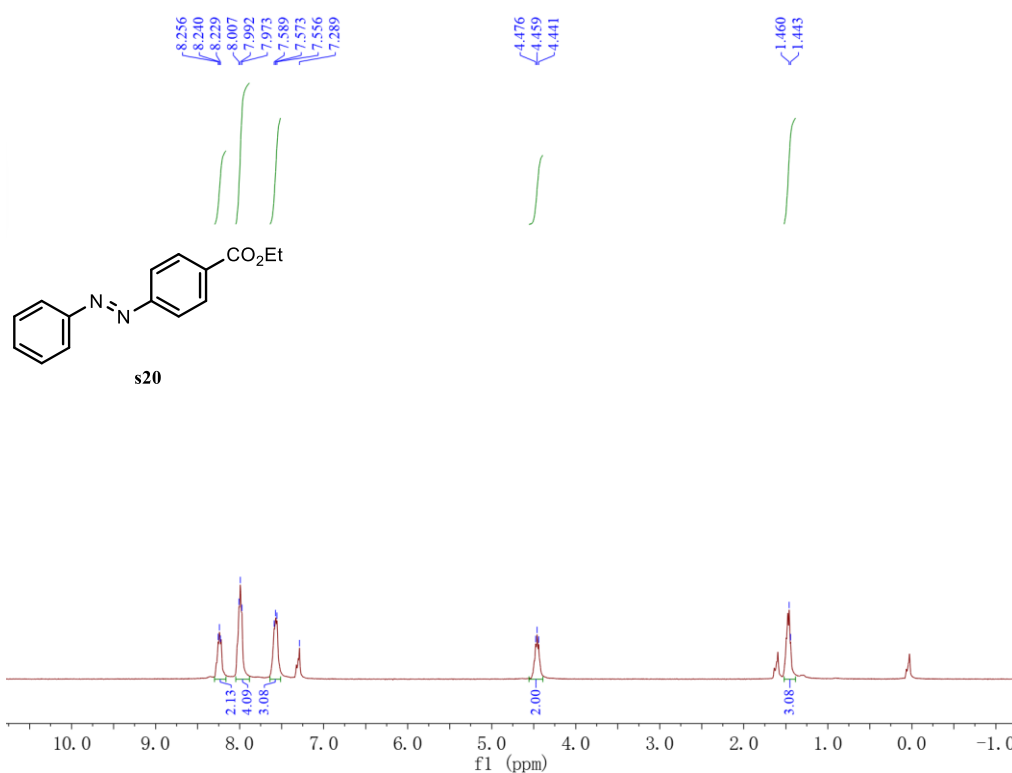

**<sup>13</sup>C NMR (101 MHz, CDCl<sub>3</sub>):**

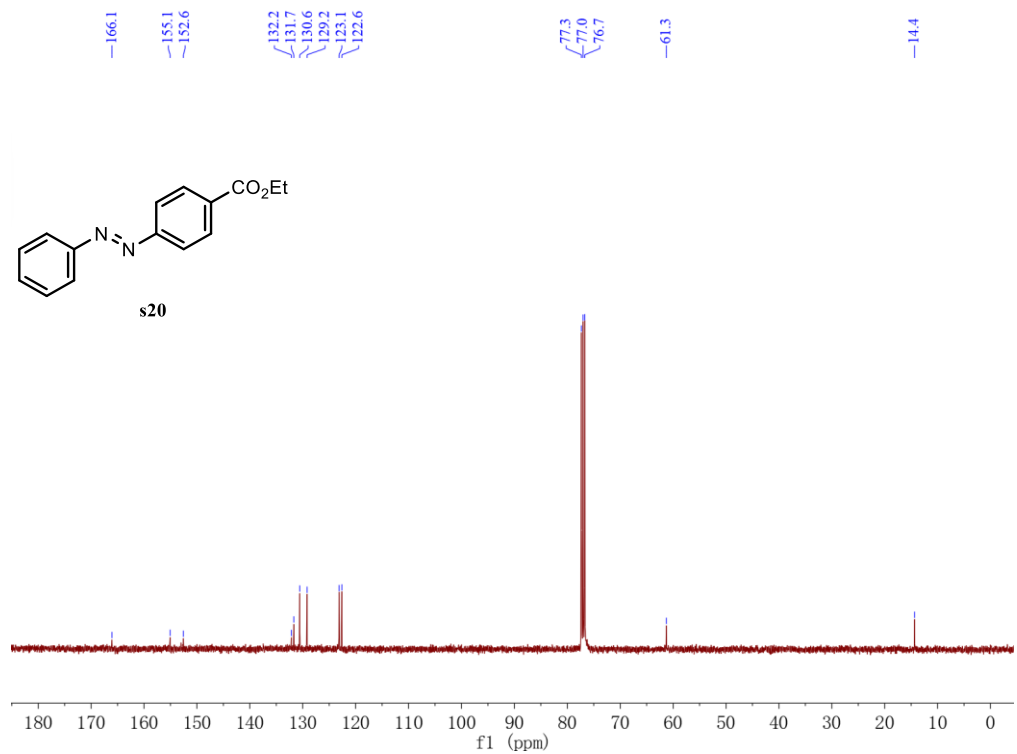

**<sup>1</sup>H NMR (400 MHz, CDCl<sub>3</sub>):**

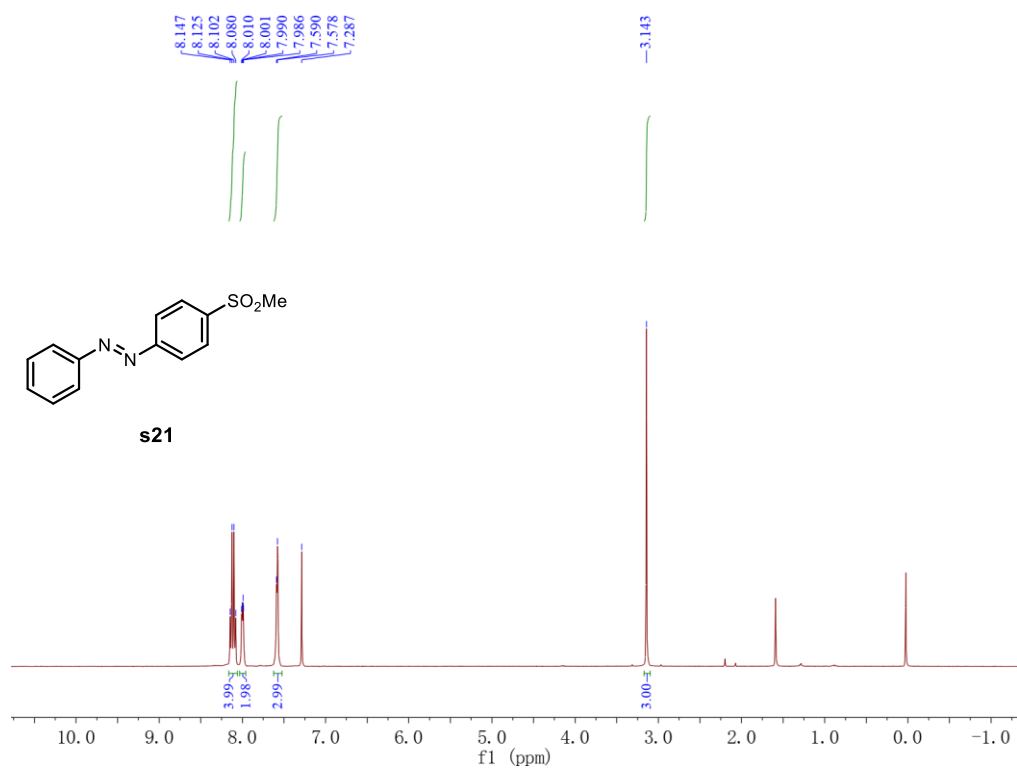

**<sup>1</sup>H NMR (400 MHz, CDCl<sub>3</sub>):**

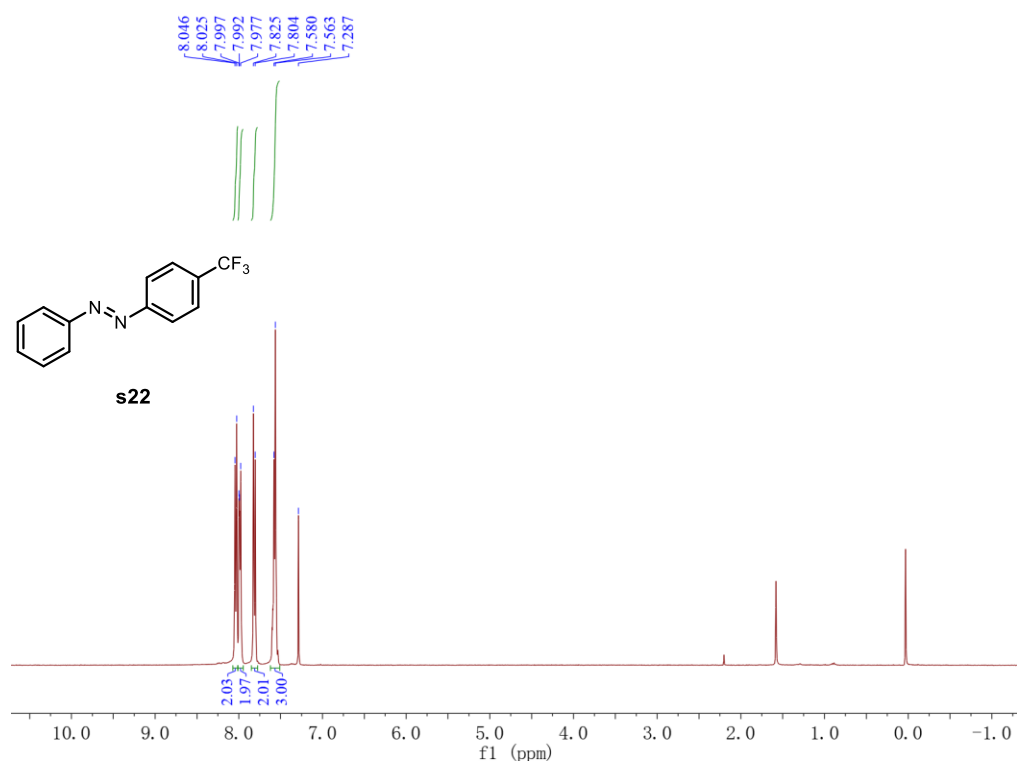

**<sup>1</sup>H NMR (400 MHz, CDCl<sub>3</sub>):**

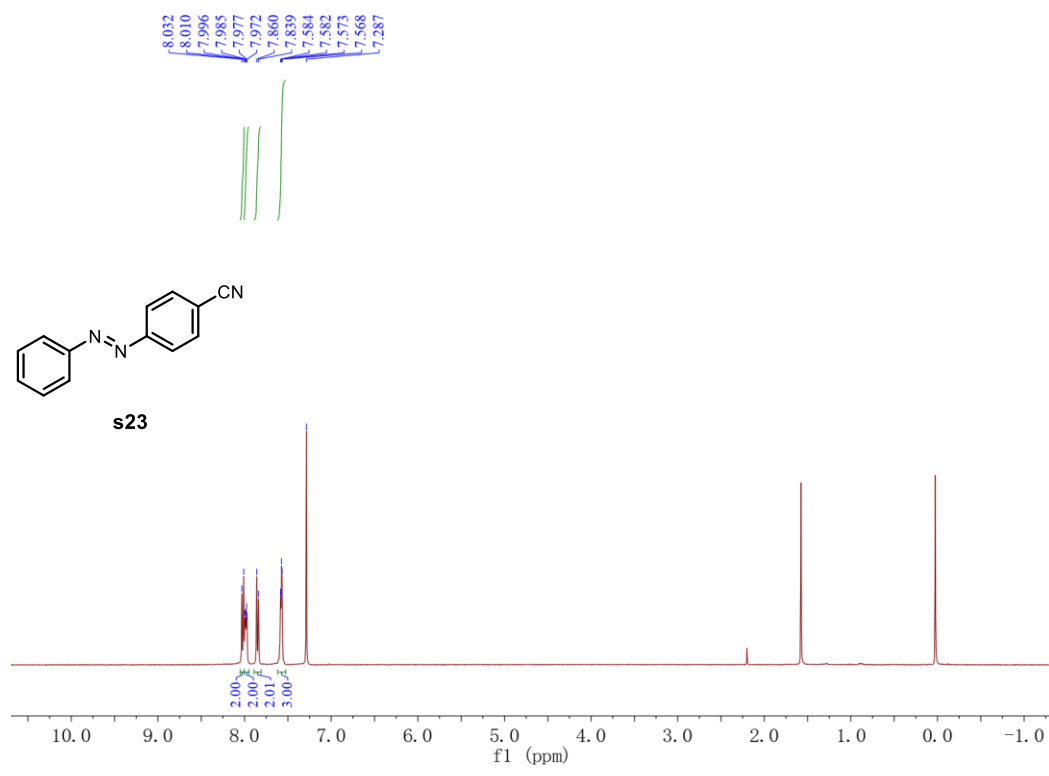

**<sup>1</sup>H NMR (400 MHz, CDCl<sub>3</sub>):**

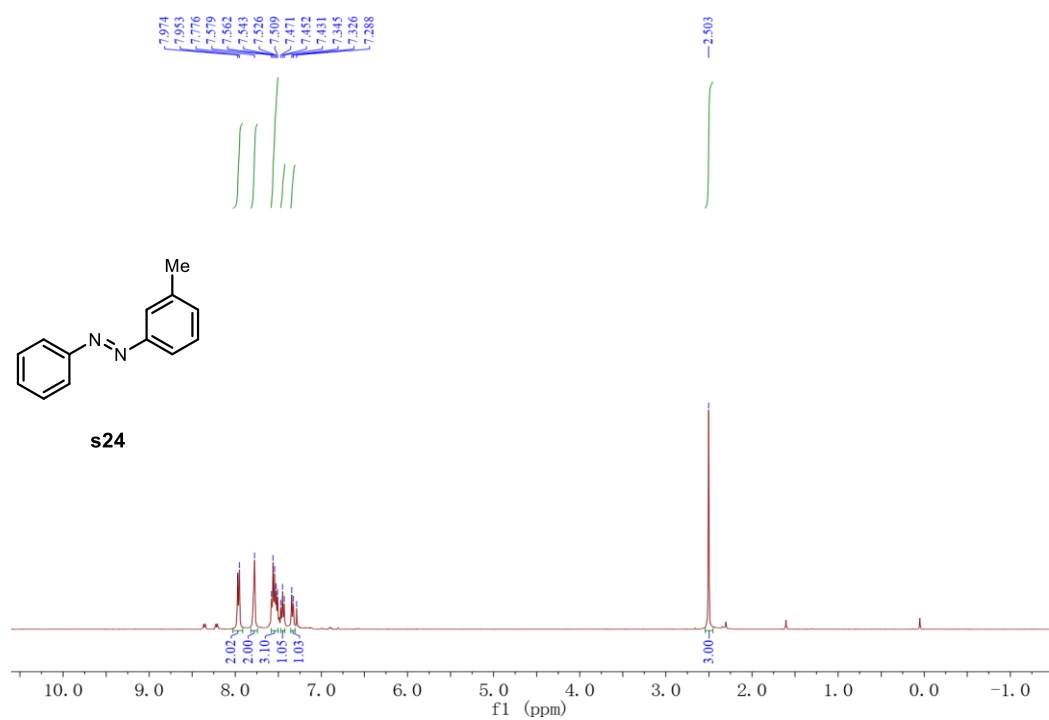

**<sup>1</sup>H NMR (400 MHz, CDCl<sub>3</sub>):**

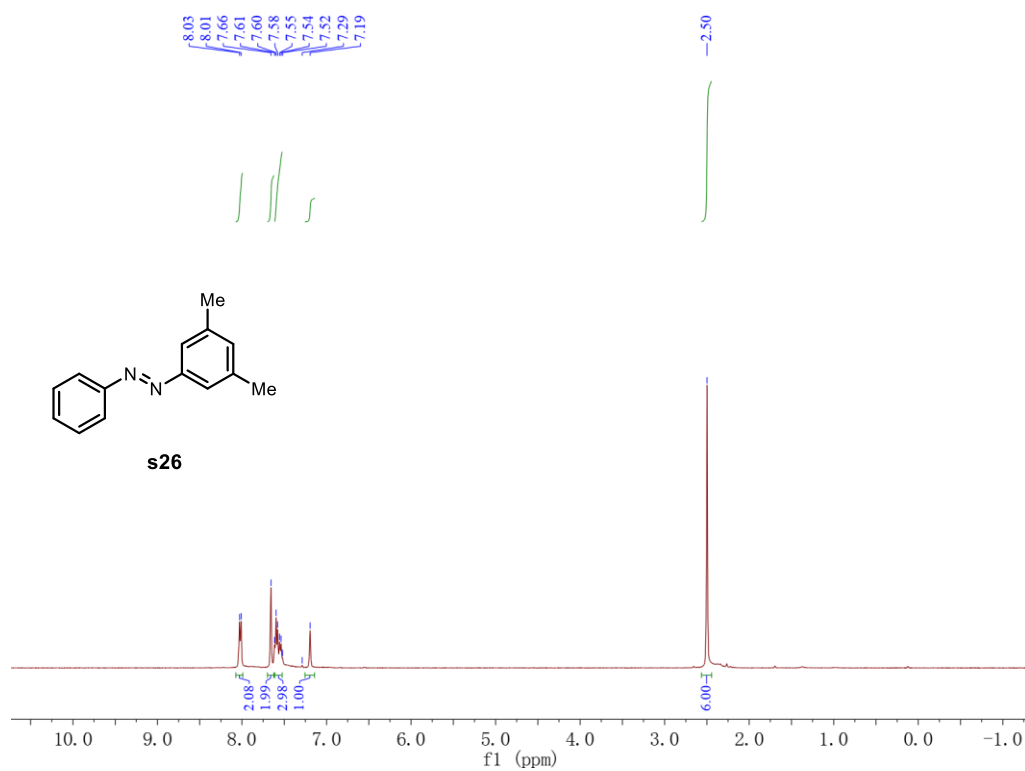

**<sup>1</sup>H NMR (400 MHz, CDCl<sub>3</sub>):**

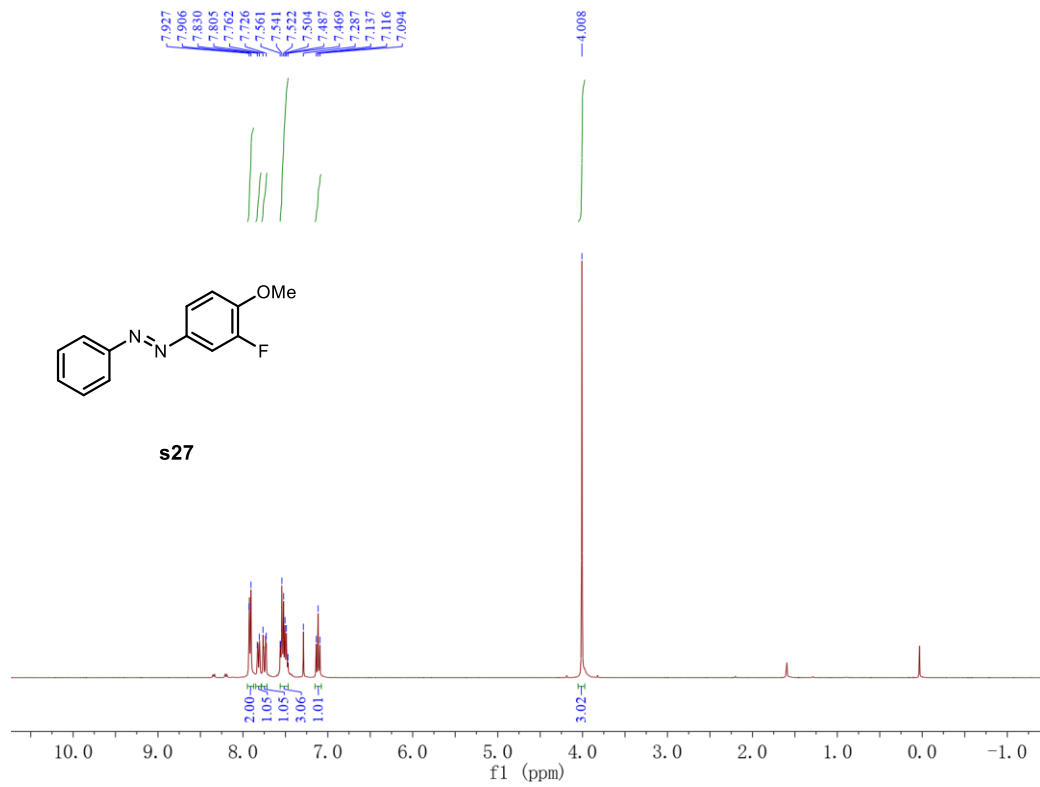

**<sup>13</sup>C NMR (101 MHz, CDCl<sub>3</sub>):**

133.95  
152.44  
151.48  
150.34  
146.72  
130.85  
129.11  
122.76  
112.42  
107.79  
77.38  
77.06  
76.75  
-56.36

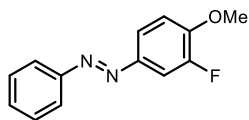

**s27**

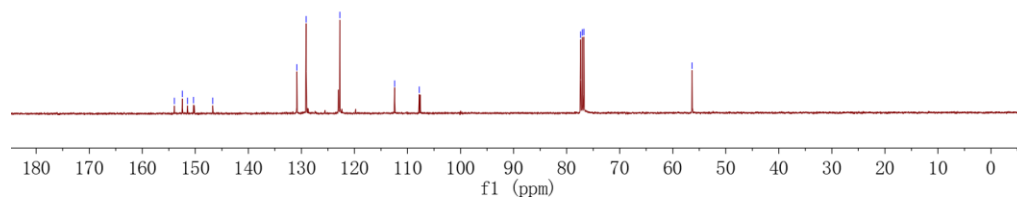

**<sup>1</sup>H NMR (400 MHz, CDCl<sub>3</sub>):**

7.938  
7.920  
7.804  
7.792  
7.771  
7.860  
7.542  
7.523  
7.498  
7.481  
7.463  
7.378  
7.287  
3.045  
3.027  
3.008  
2.990  
2.216  
2.197  
2.179  
2.160  
2.142

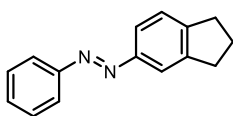

**s28**

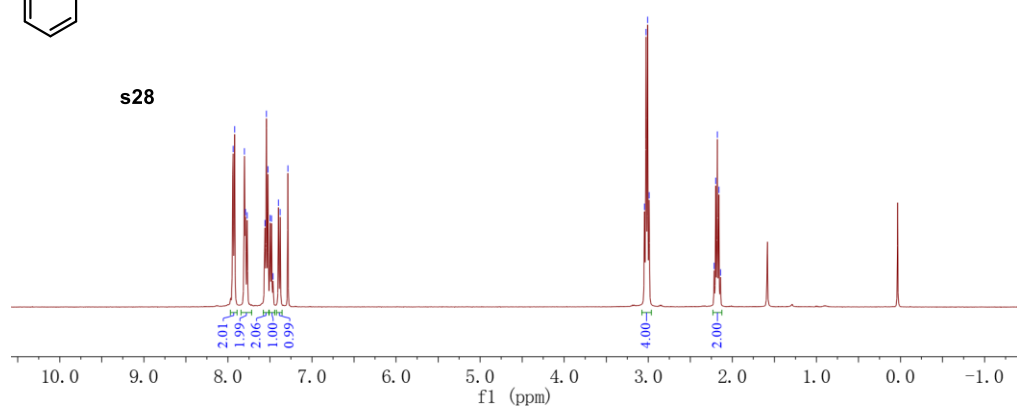

**<sup>1</sup>H NMR (400 MHz, CDCl<sub>3</sub>):**

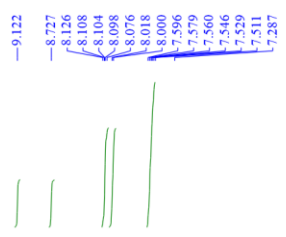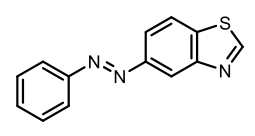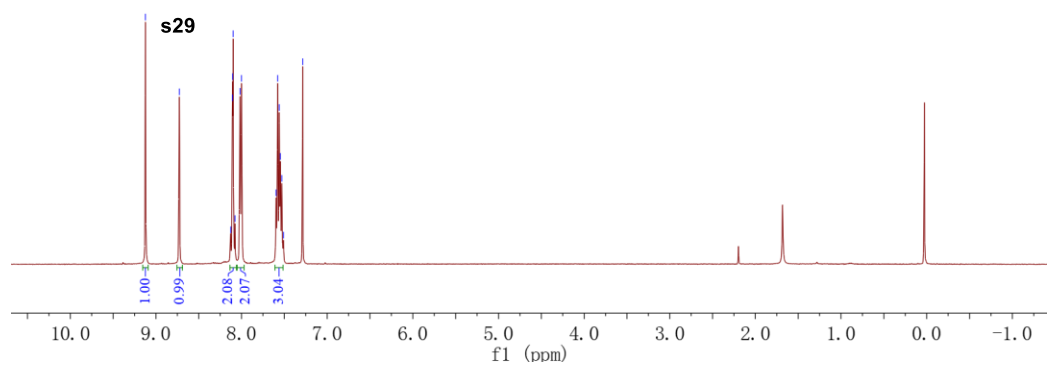

**<sup>13</sup>C NMR (101 MHz, CDCl<sub>3</sub>):**

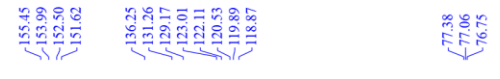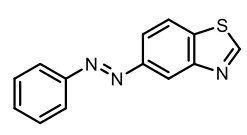

**s29**

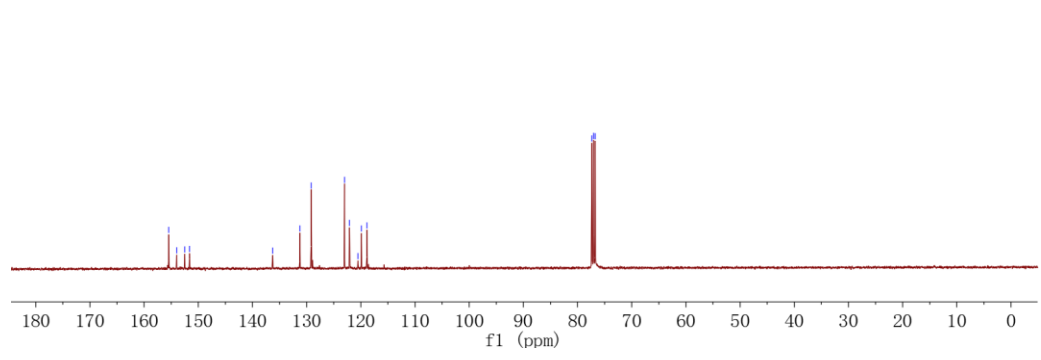

**<sup>1</sup>H NMR (400 MHz, CDCl<sub>3</sub>):**

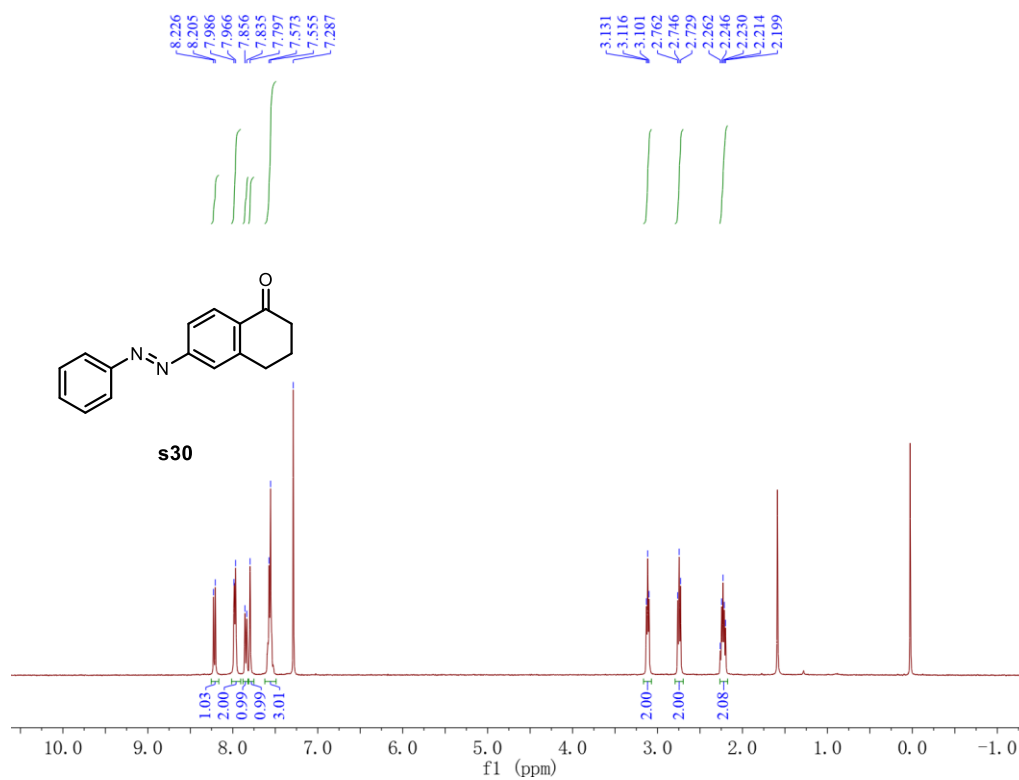

**<sup>13</sup>C NMR (101 MHz, CDCl<sub>3</sub>):**

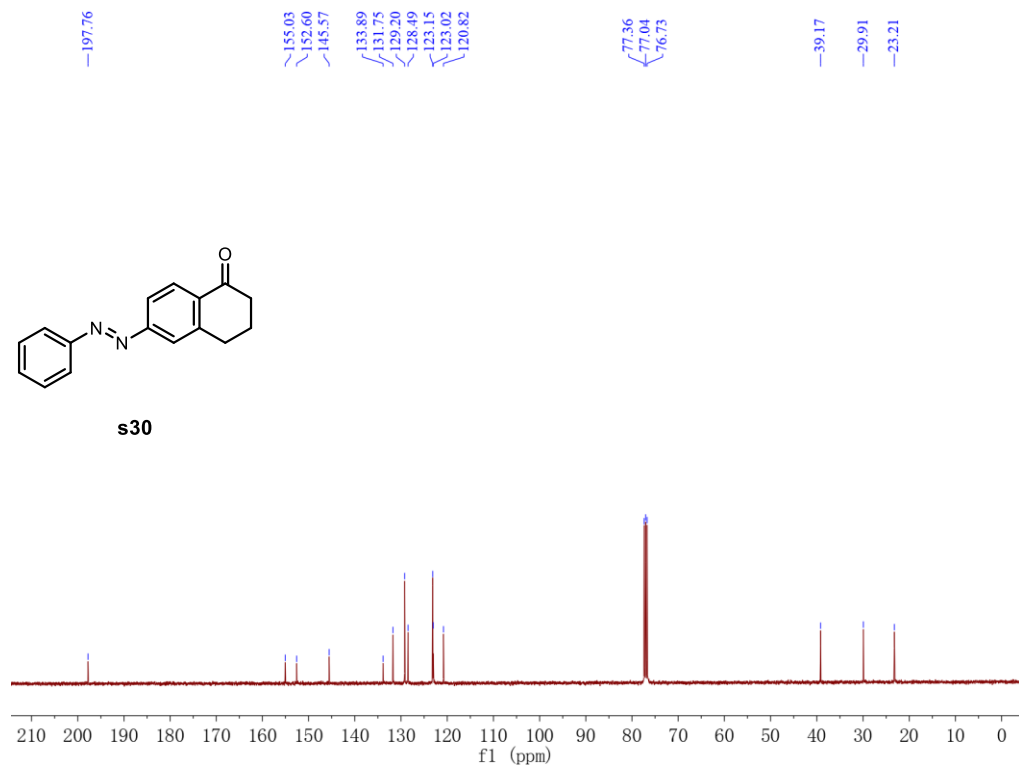

**<sup>1</sup>H NMR (400 MHz, CDCl<sub>3</sub>):**

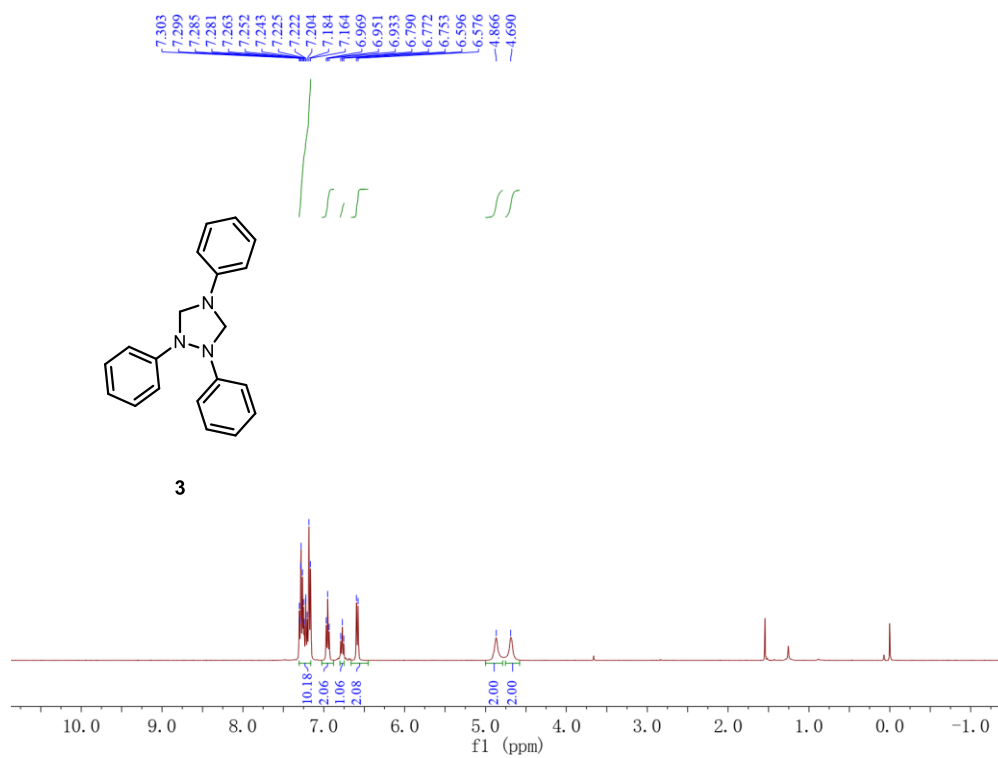

**<sup>13</sup>C NMR (101 MHz, CDCl<sub>3</sub>):**

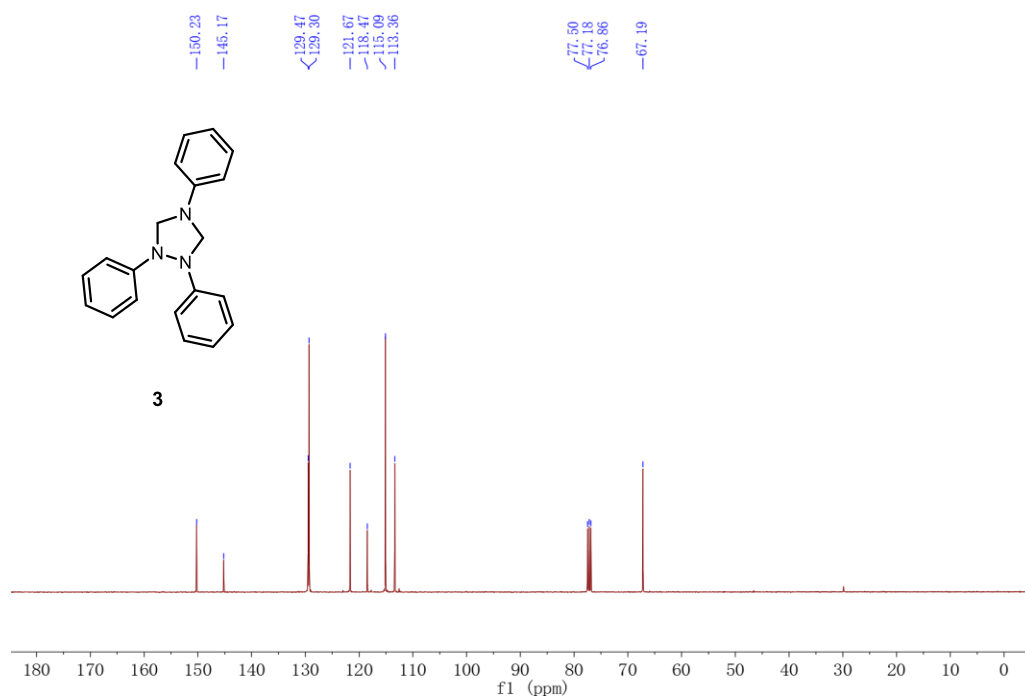

**<sup>1</sup>H NMR (400 MHz, CDCl<sub>3</sub>):**

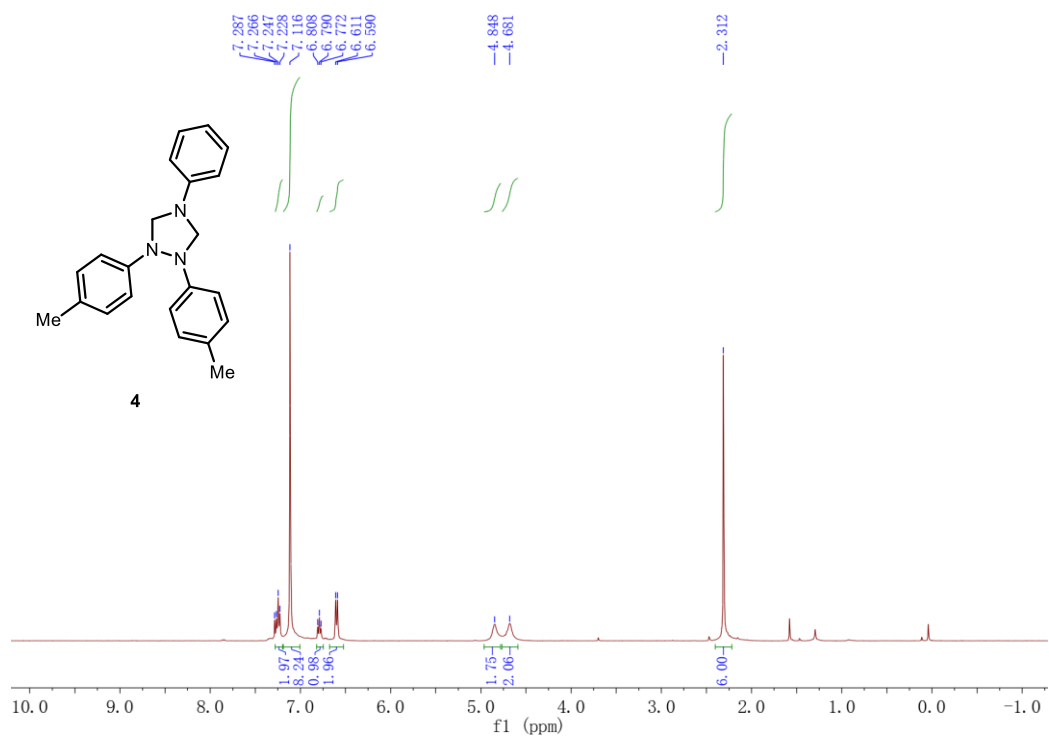

**<sup>13</sup>C NMR (101 MHz, CDCl<sub>3</sub>):**

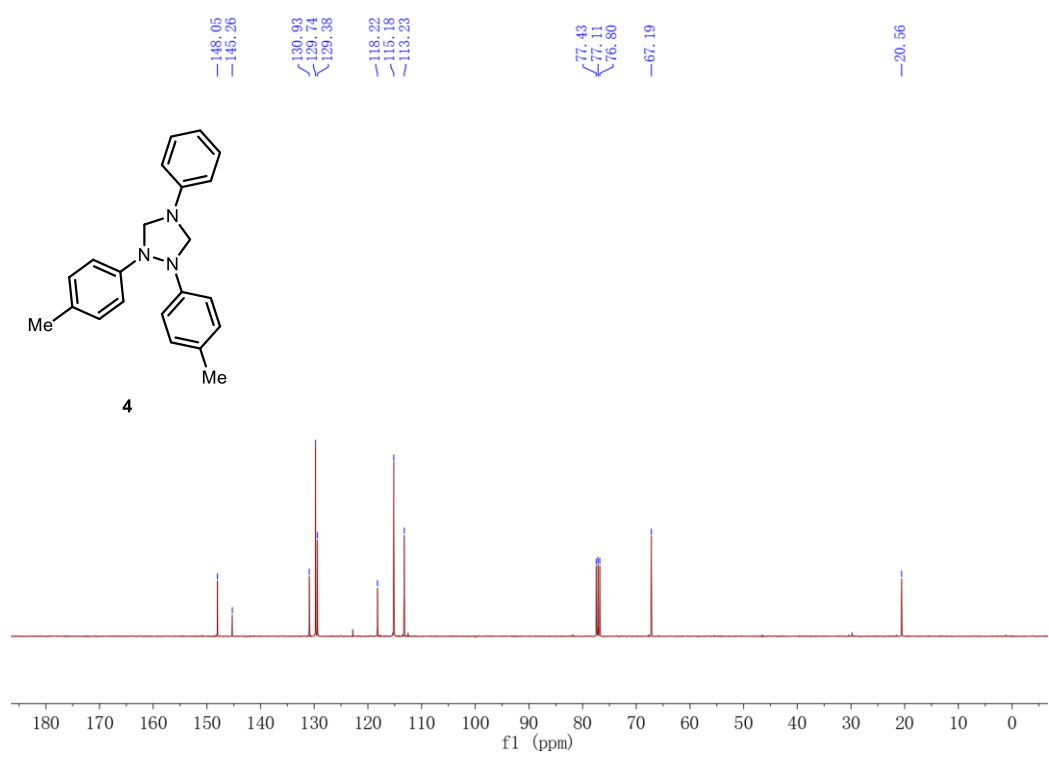

**<sup>1</sup>H NMR (400 MHz, CDCl<sub>3</sub>):**

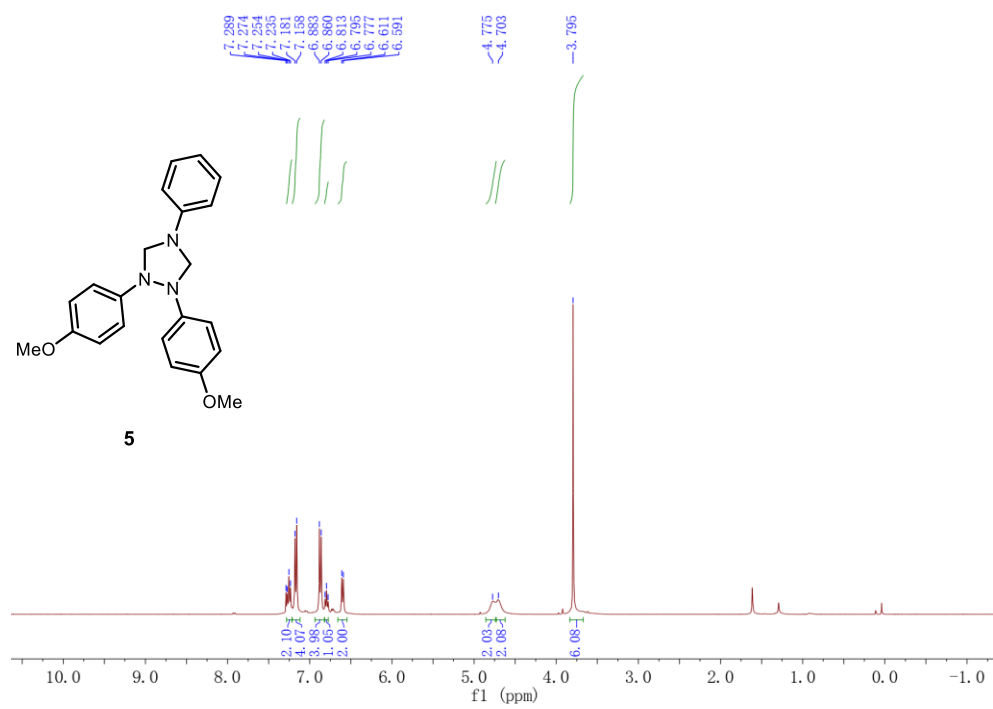

**<sup>13</sup>C NMR (101 MHz, CDCl<sub>3</sub>):**

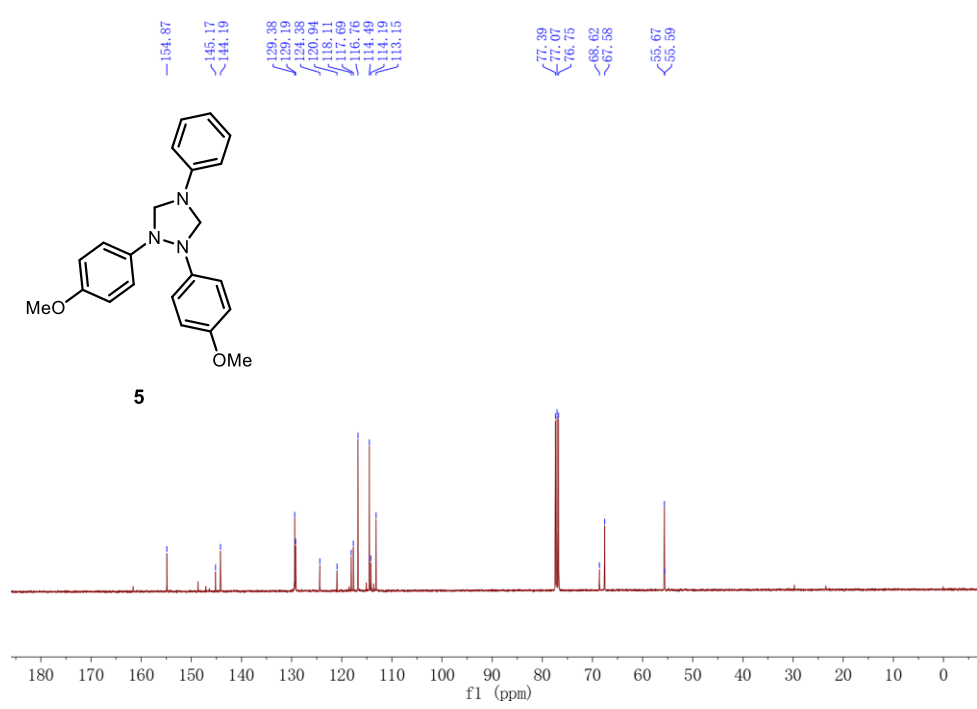

**<sup>1</sup>H NMR (400 MHz, CDCl<sub>3</sub>):**

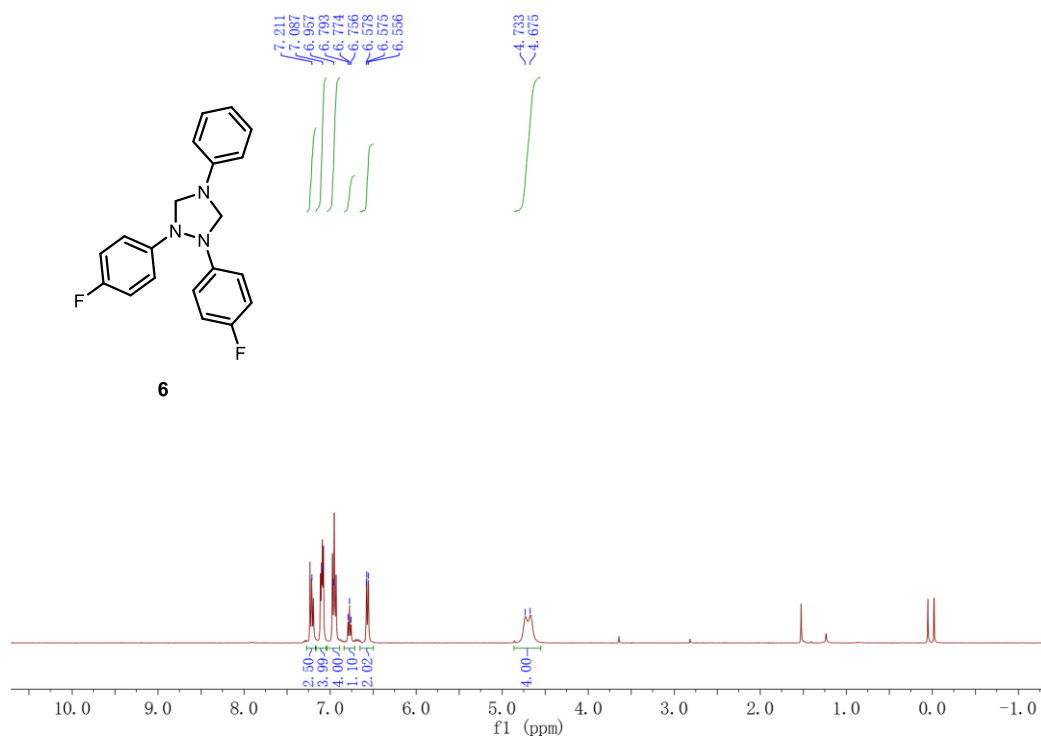

**<sup>13</sup>C NMR (101 MHz, CDCl<sub>3</sub>):**

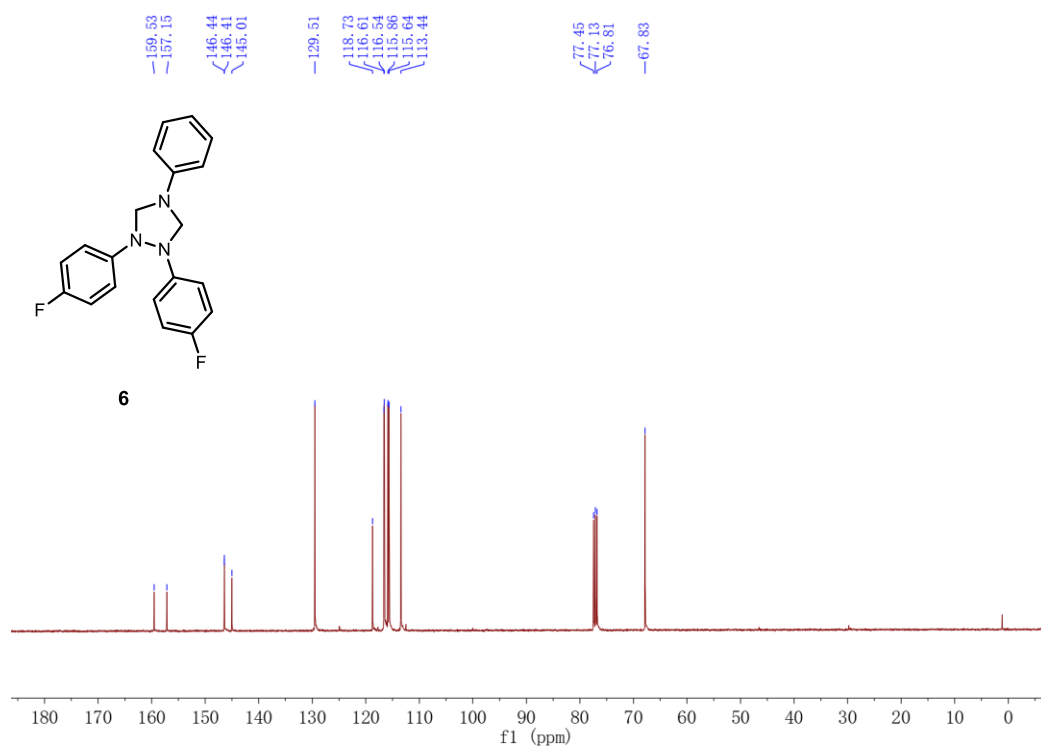

**<sup>1</sup>H NMR (400 MHz, CDCl<sub>3</sub>):**

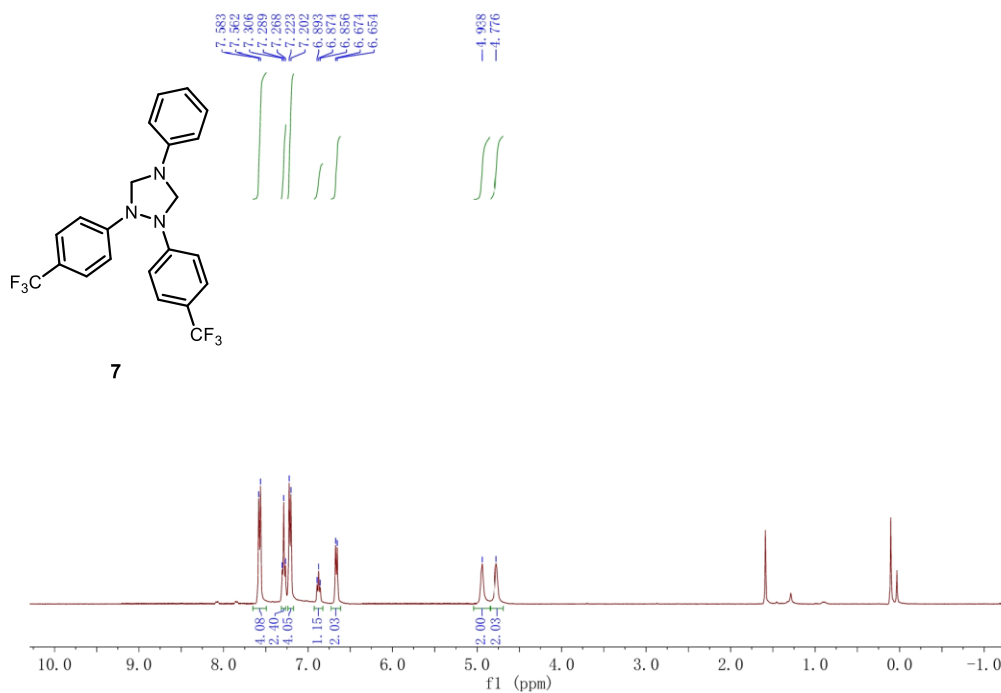

**<sup>13</sup>C NMR (101 MHz, CDCl<sub>3</sub>):**

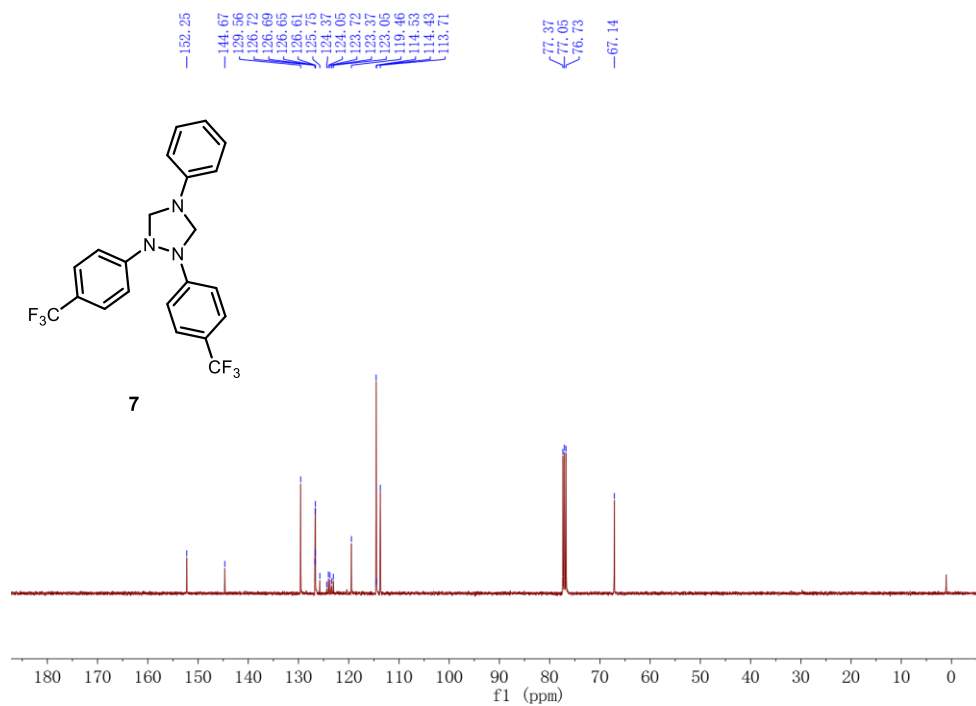

**<sup>1</sup>H NMR (400 MHz, CDCl<sub>3</sub>):**

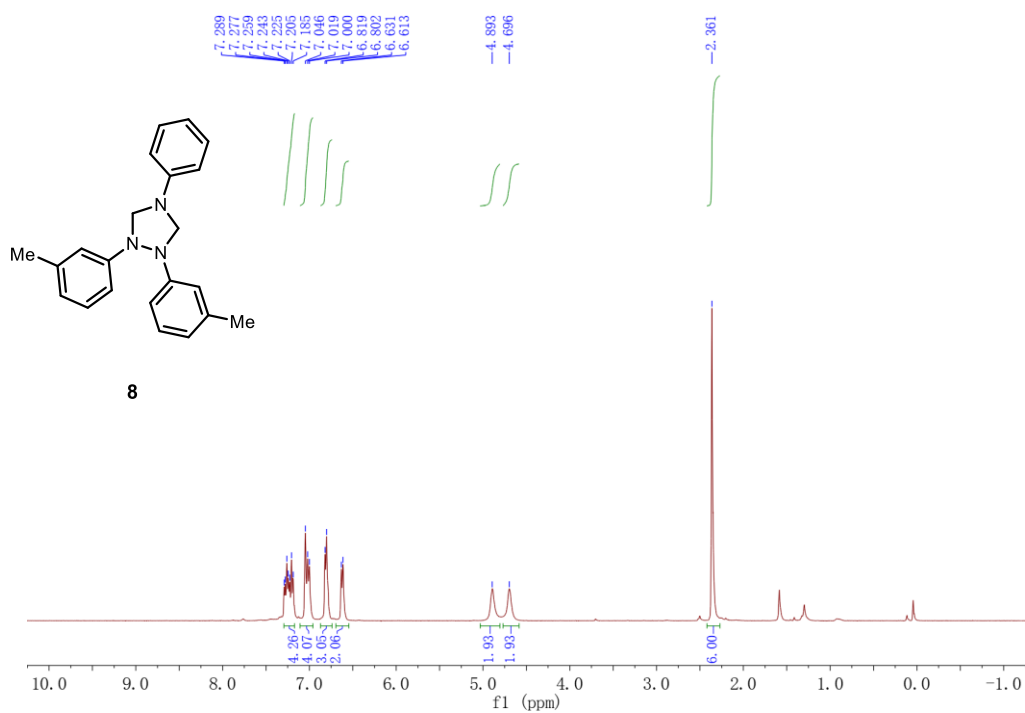

**<sup>13</sup>C NMR (101 MHz, CDCl<sub>3</sub>):**

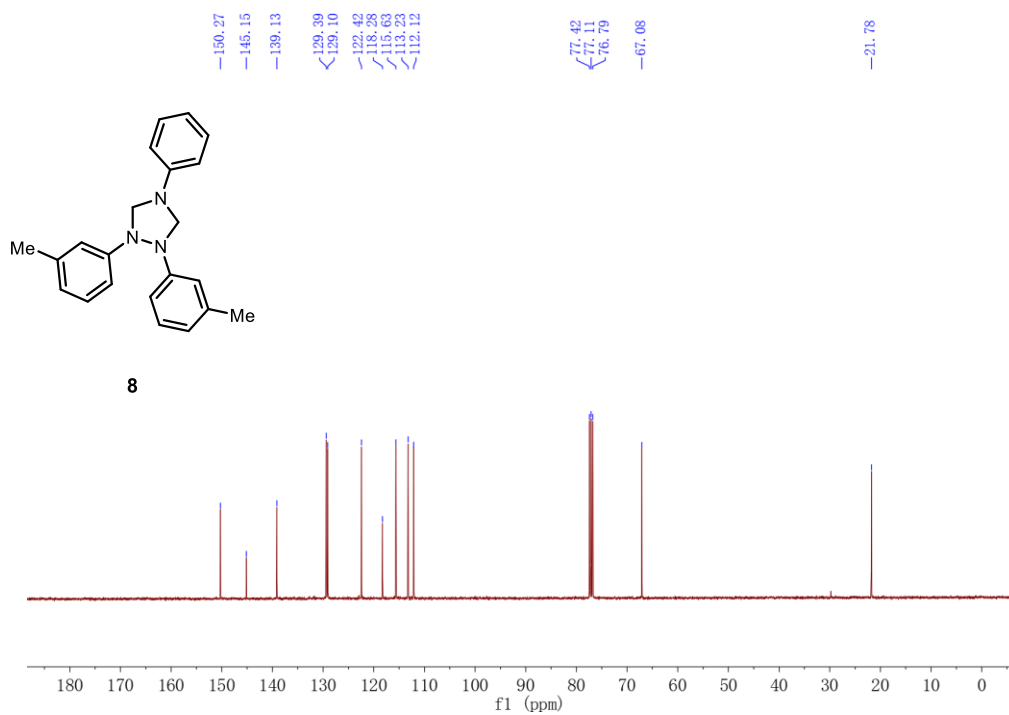

**<sup>1</sup>H NMR (400 MHz, CDCl<sub>3</sub>):**

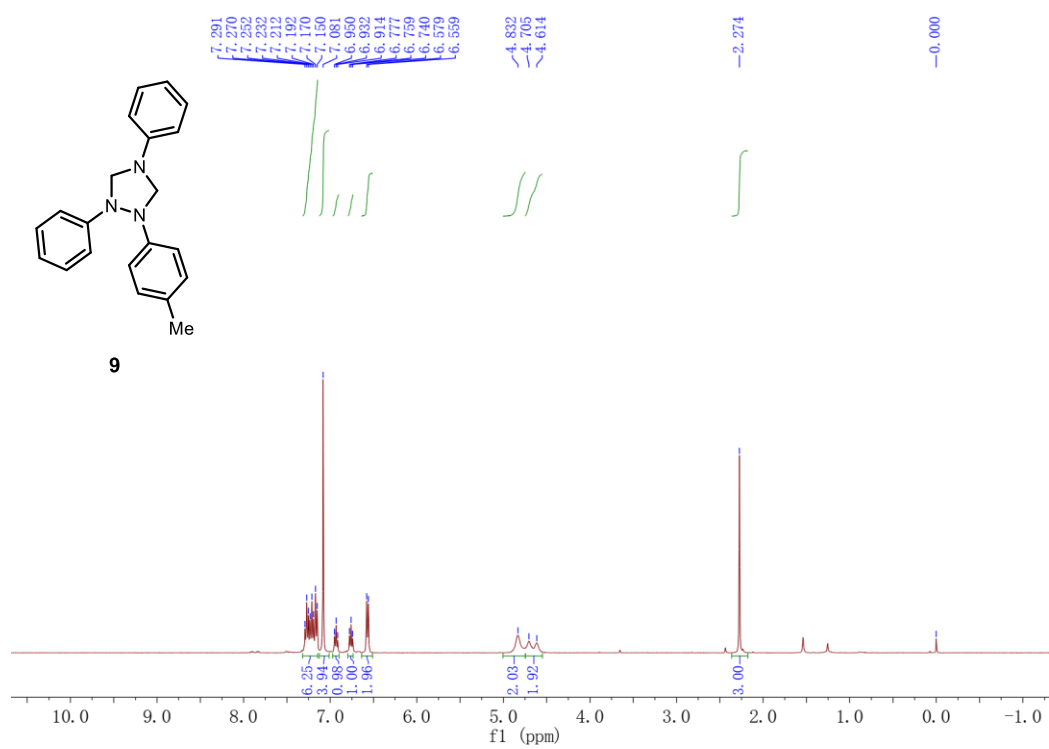

**<sup>13</sup>C NMR (101 MHz, CDCl<sub>3</sub>):**

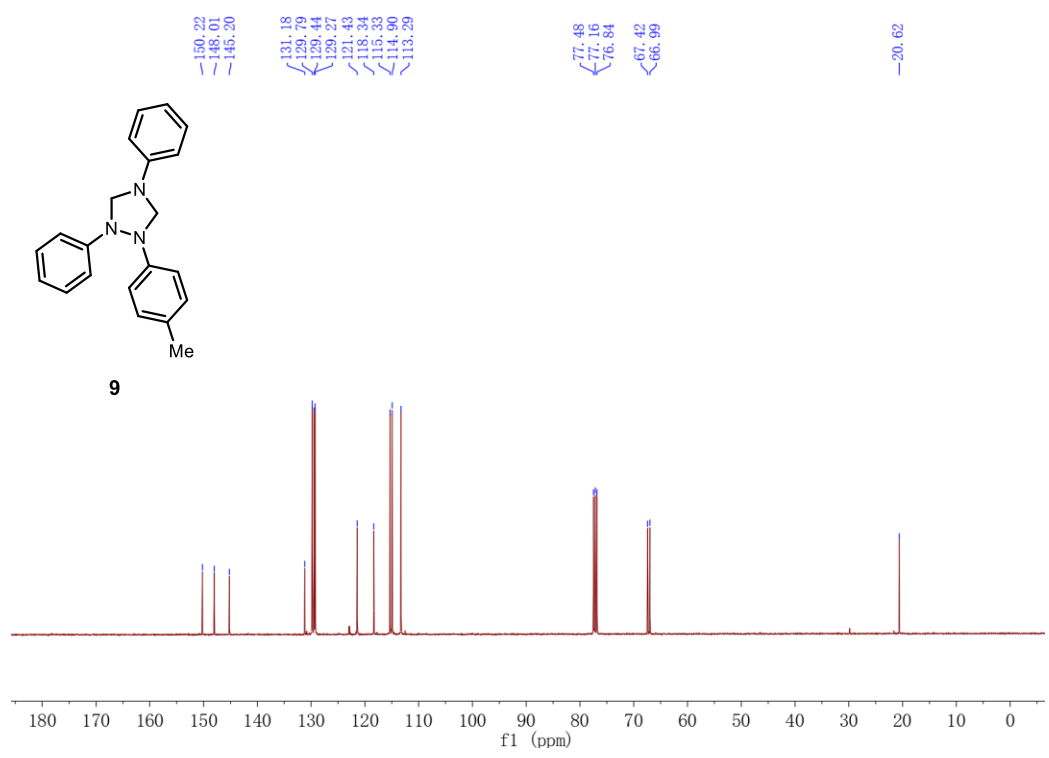

**<sup>1</sup>H NMR (400 MHz, CDCl<sub>3</sub>):**

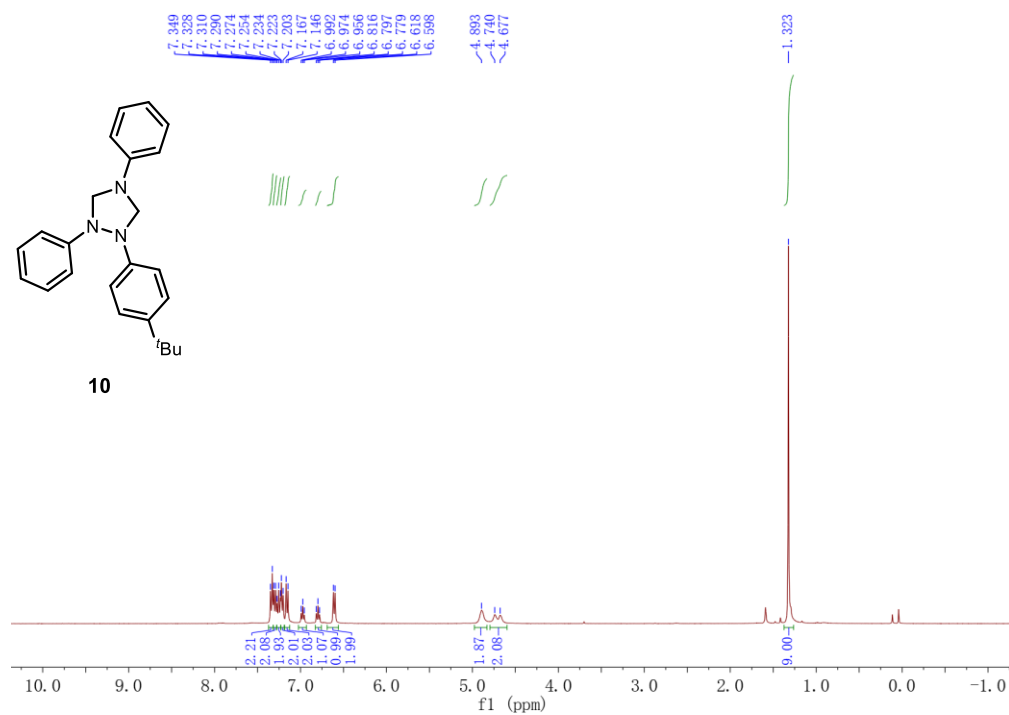

**<sup>13</sup>C NMR (101 MHz, CDCl<sub>3</sub>):**

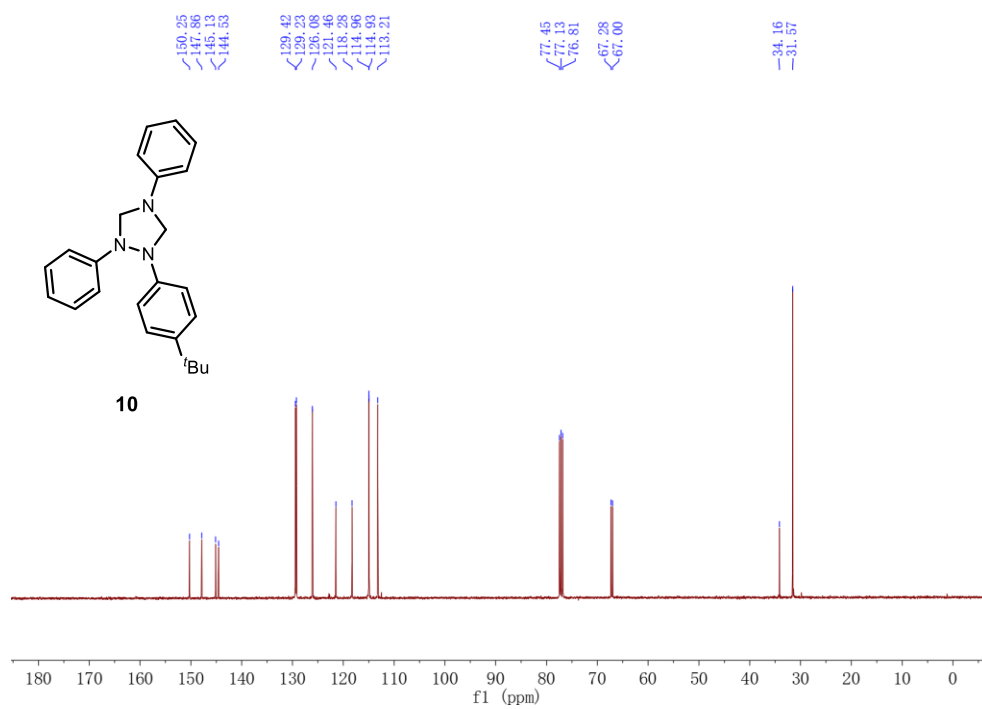

**<sup>1</sup>H NMR (400 MHz, CDCl<sub>3</sub>):**

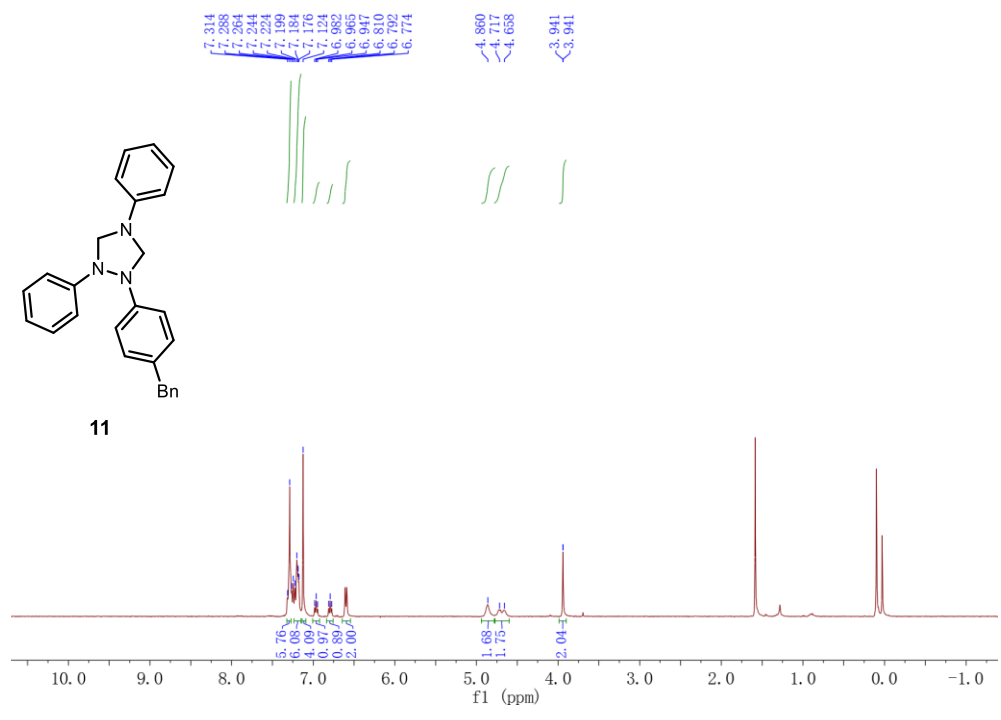

**<sup>13</sup>C NMR (101 MHz, CDCl<sub>3</sub>):**

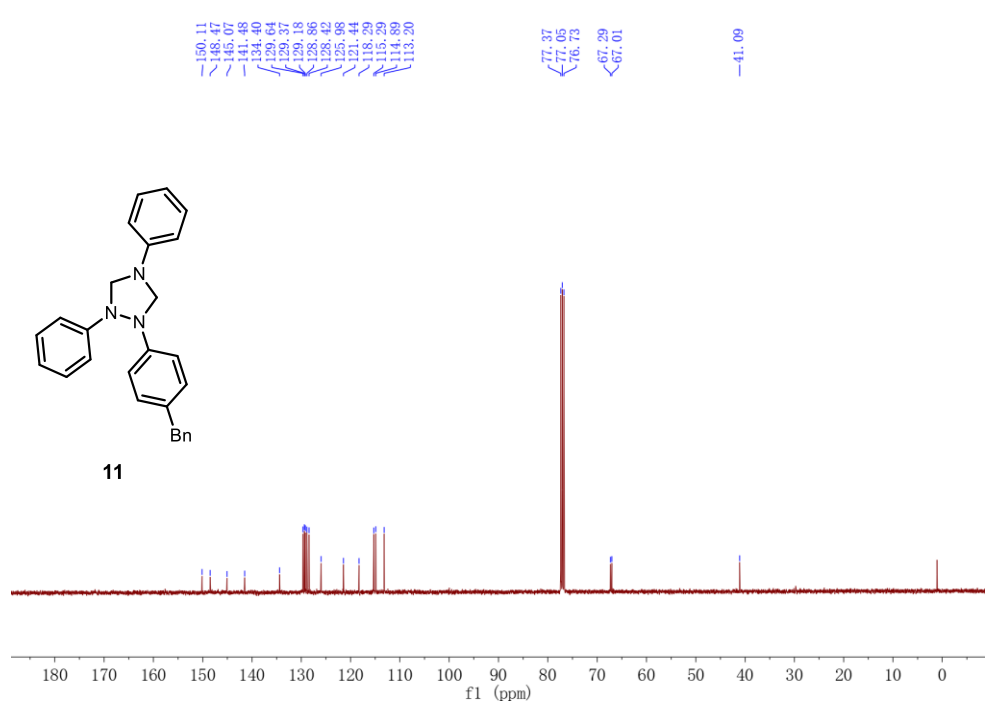

**<sup>1</sup>H NMR (400 MHz, CDCl<sub>3</sub>):**

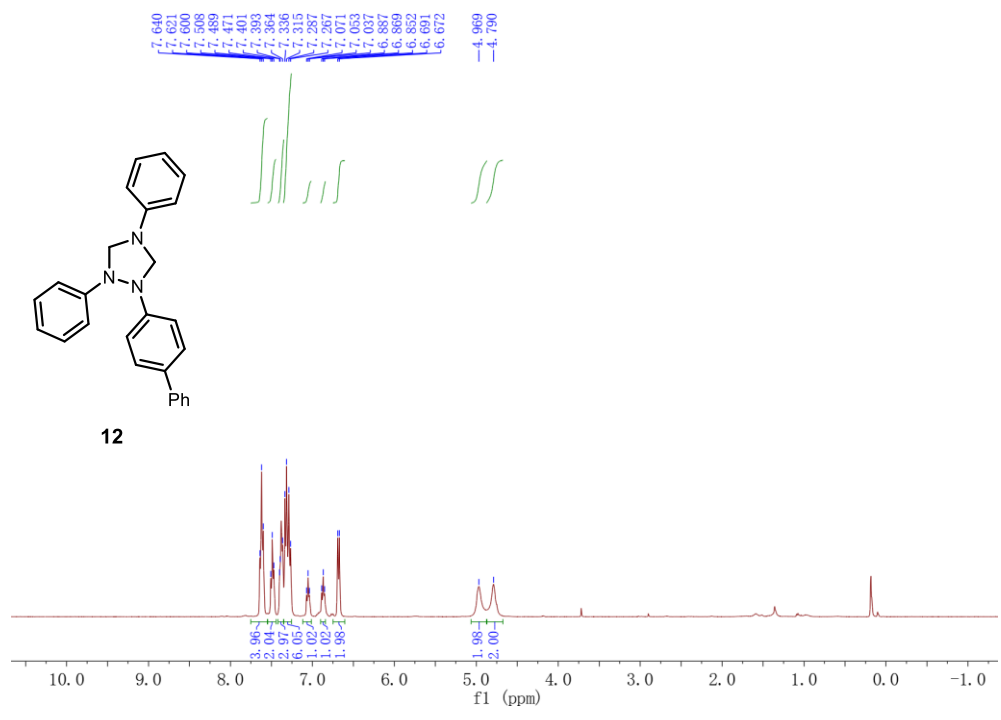

**<sup>13</sup>C NMR (101 MHz, CDCl<sub>3</sub>):**

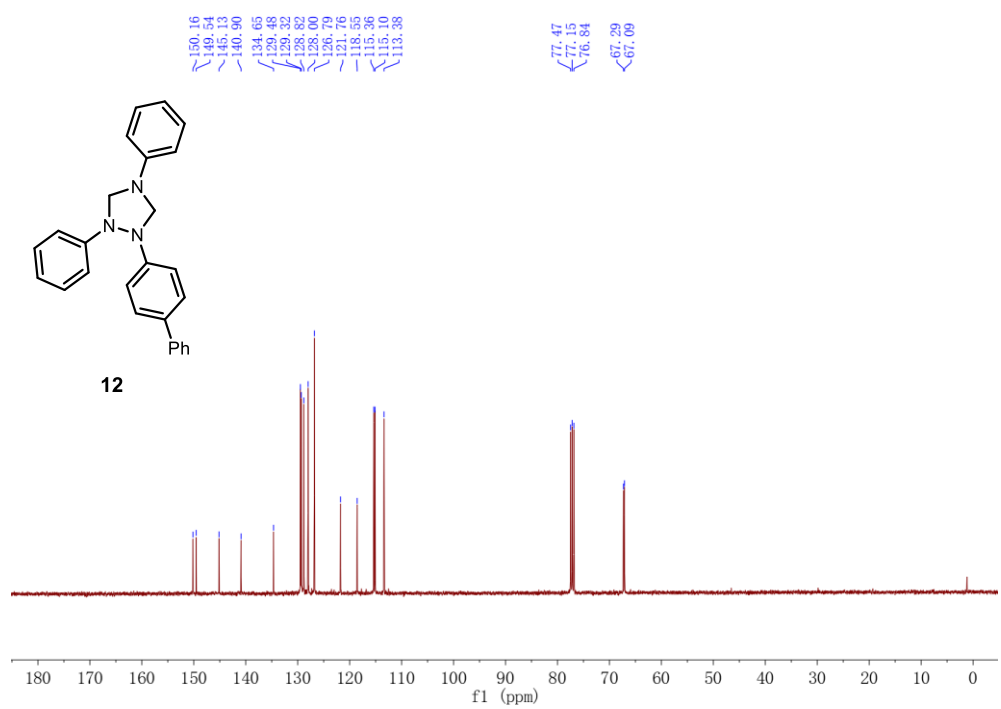

**<sup>1</sup>H NMR (400 MHz, CDCl<sub>3</sub>):**

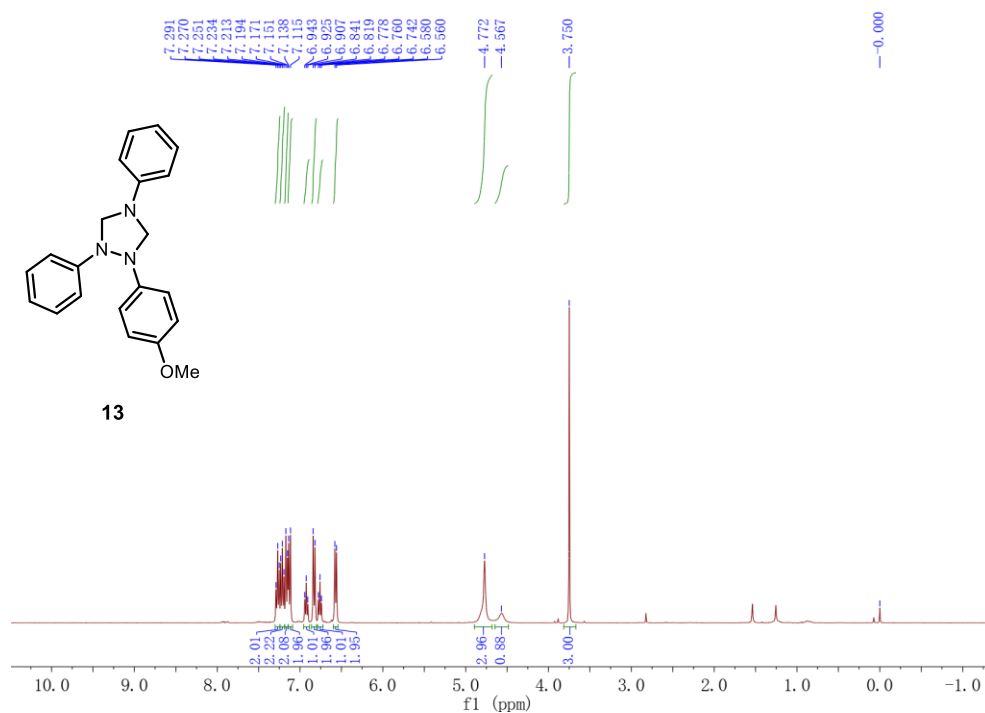

**<sup>13</sup>C NMR (101 MHz, CDCl<sub>3</sub>):**

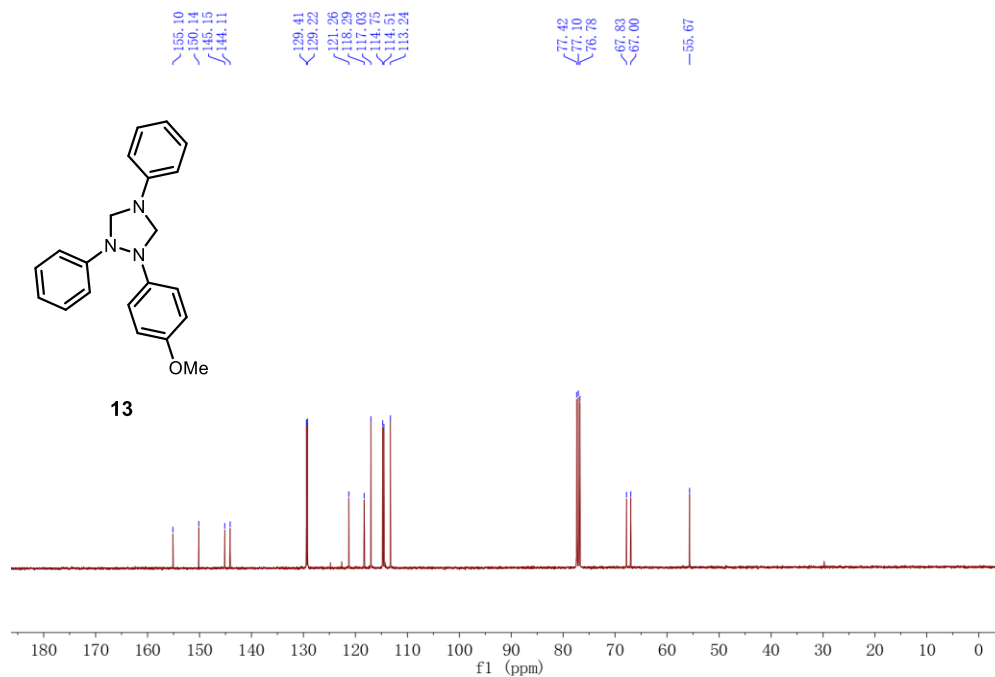

**<sup>1</sup>H NMR (400 MHz, CDCl<sub>3</sub>):**

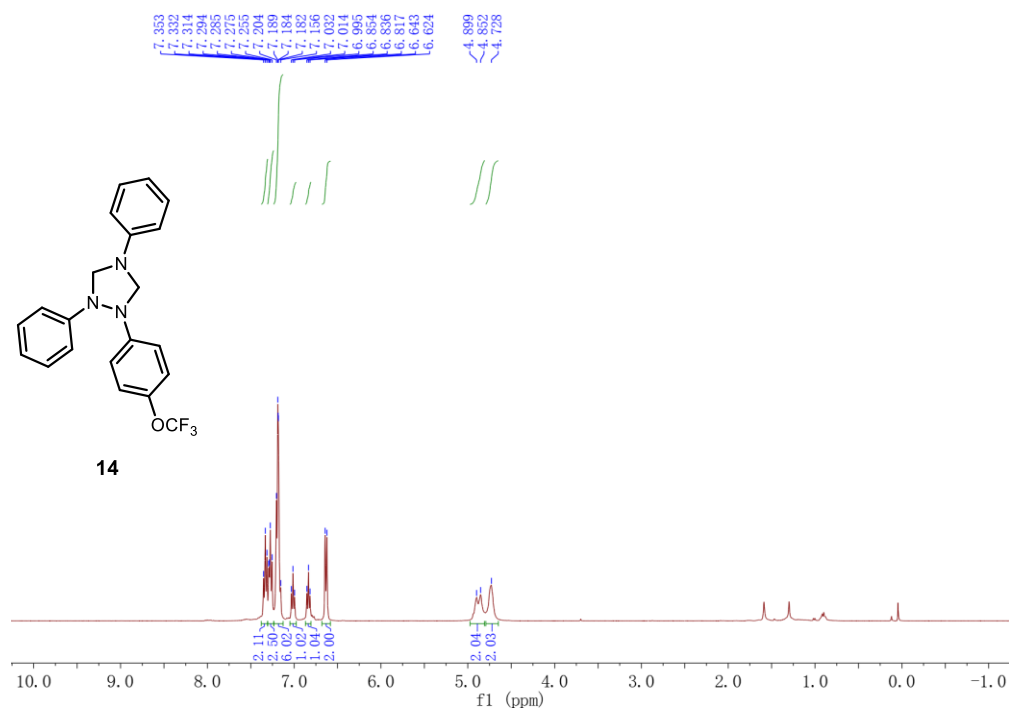

**<sup>13</sup>C NMR (101 MHz, CDCl<sub>3</sub>):**

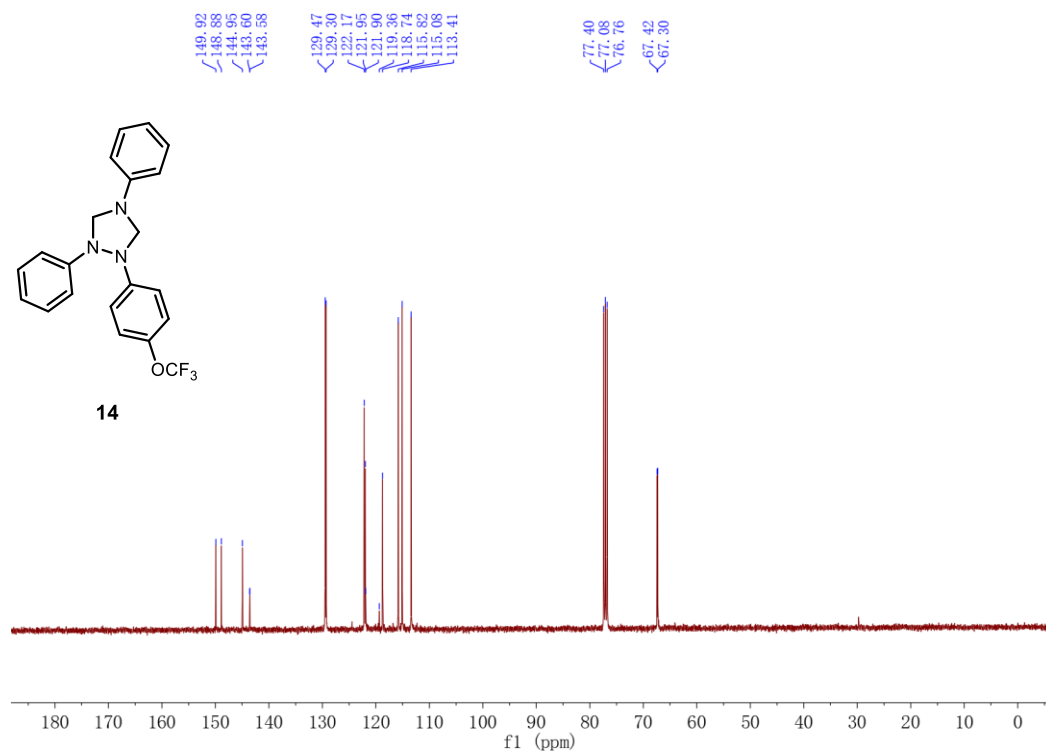

**<sup>1</sup>H NMR (400 MHz, CDCl<sub>3</sub>):**

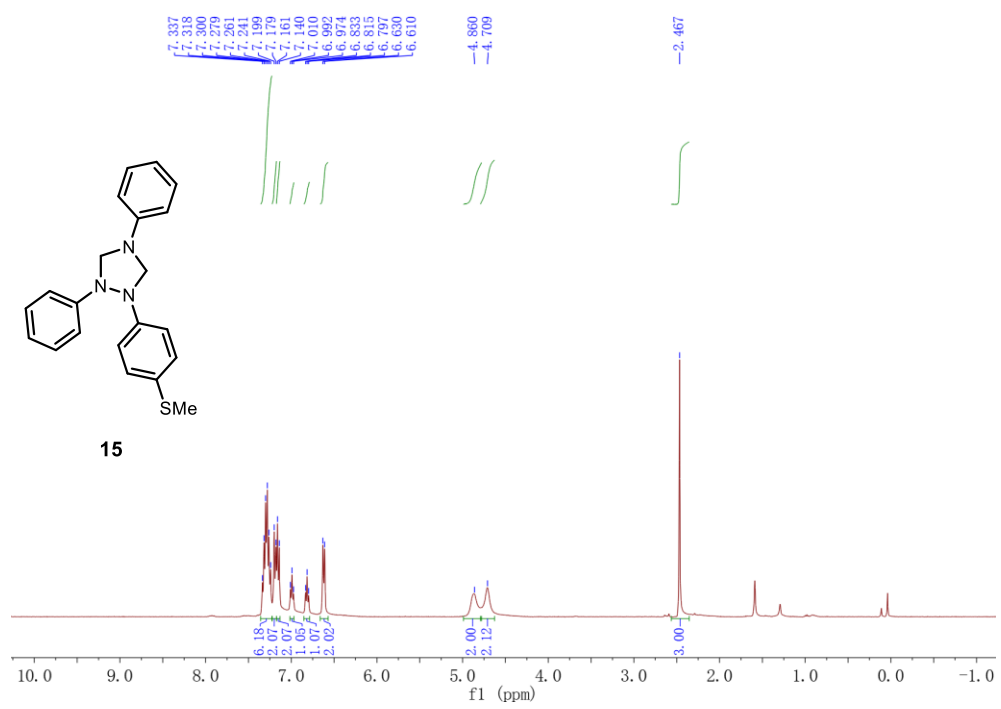

**<sup>13</sup>C NMR (101 MHz, CDCl<sub>3</sub>):**

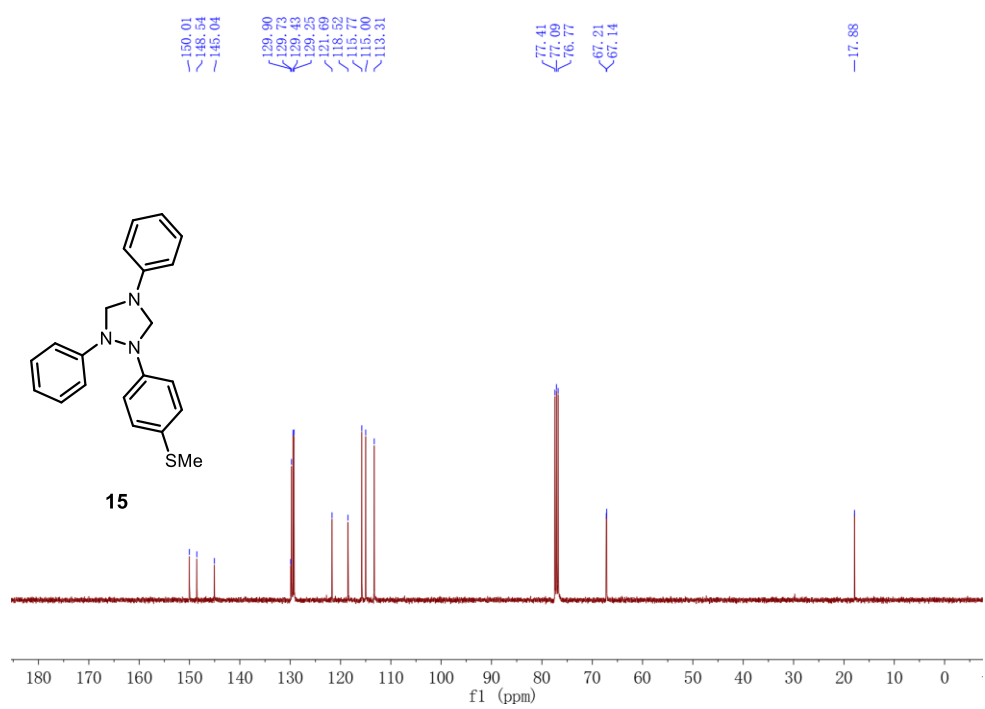

**<sup>1</sup>H NMR (400 MHz, CDCl<sub>3</sub>):**

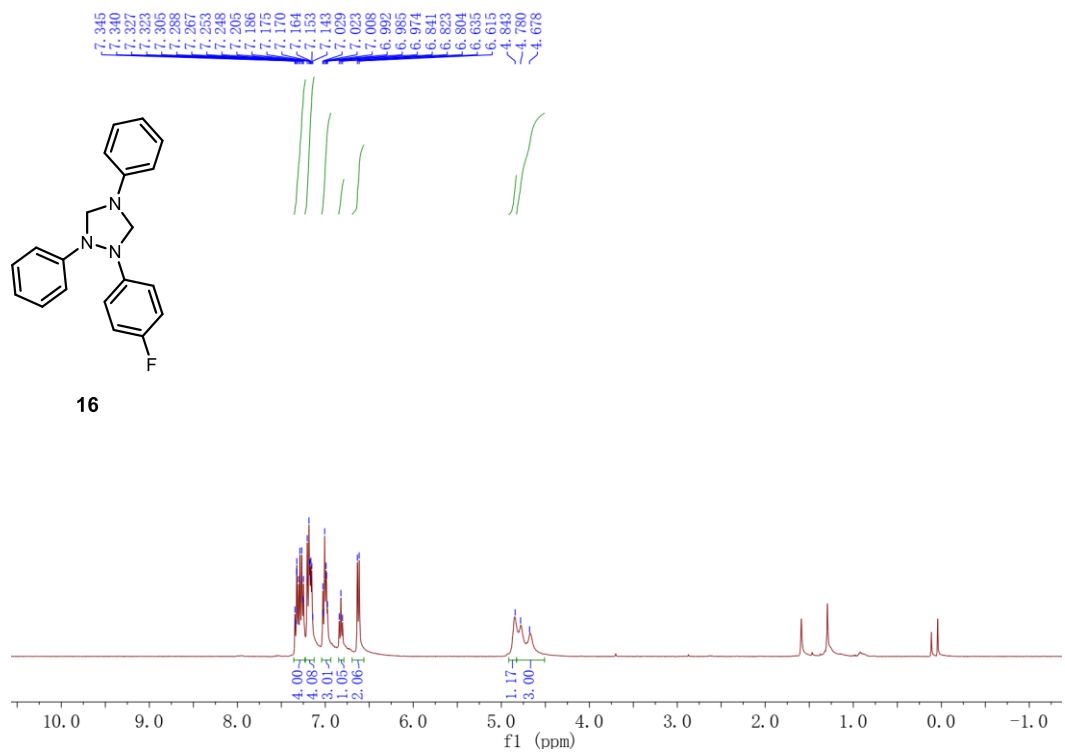

**<sup>13</sup>C NMR (101 MHz, CDCl<sub>3</sub>):**

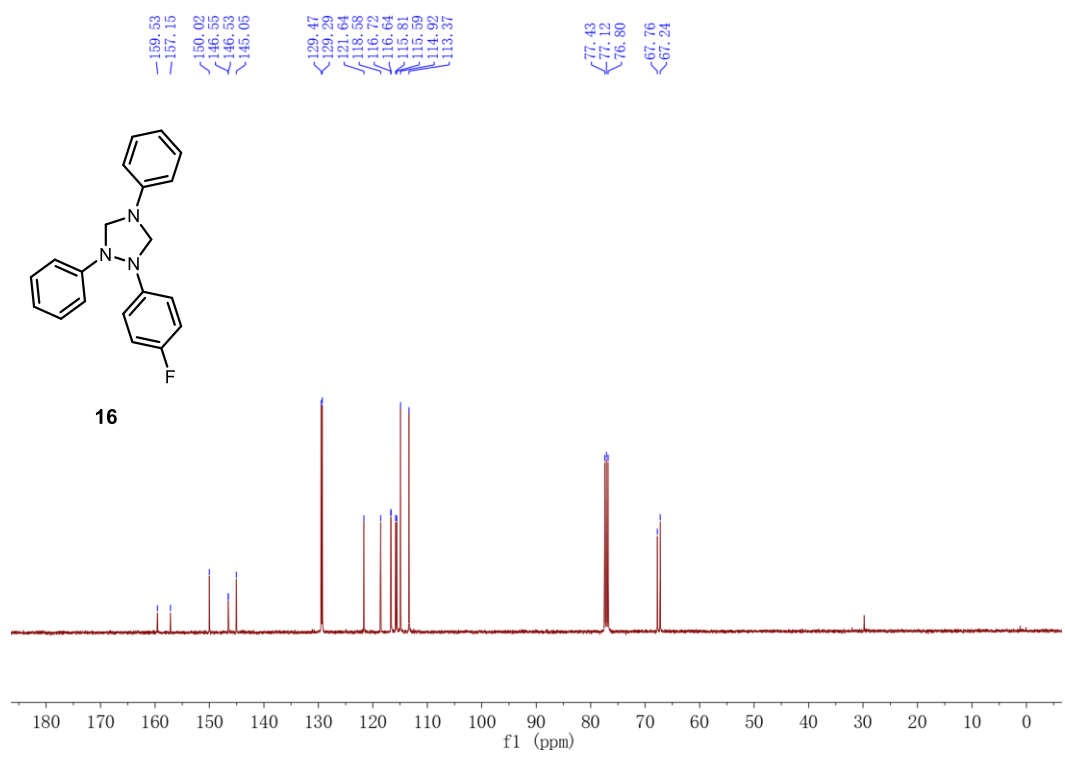

**<sup>1</sup>H NMR (400 MHz, CDCl<sub>3</sub>):**

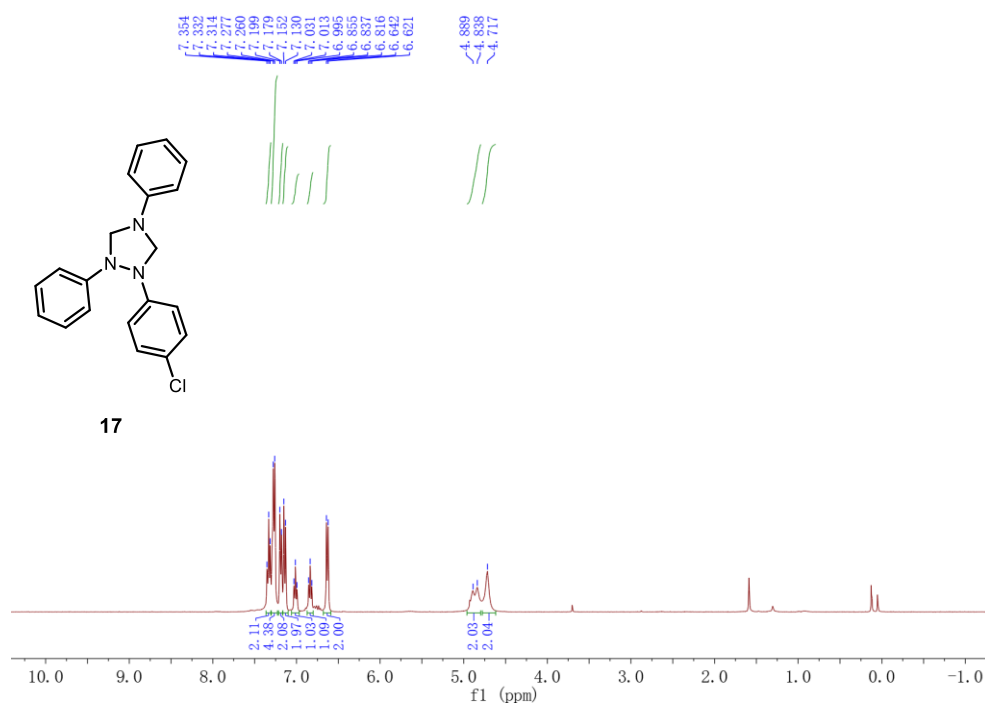

**<sup>13</sup>C NMR (101 MHz, CDCl<sub>3</sub>):**

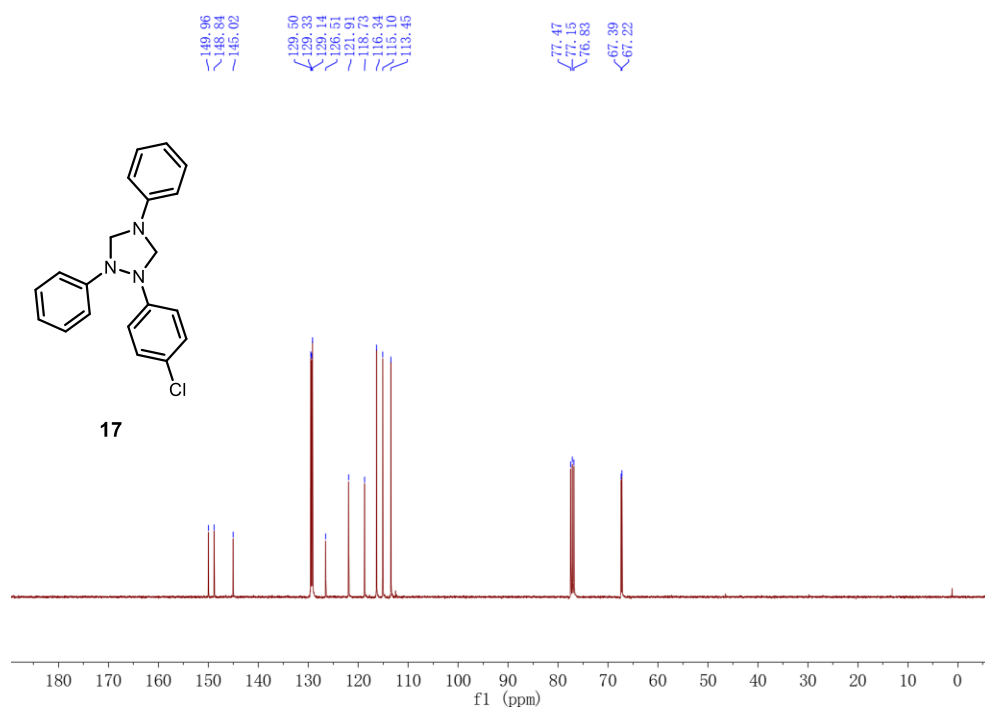

**<sup>1</sup>H NMR (400 MHz, CDCl<sub>3</sub>):**

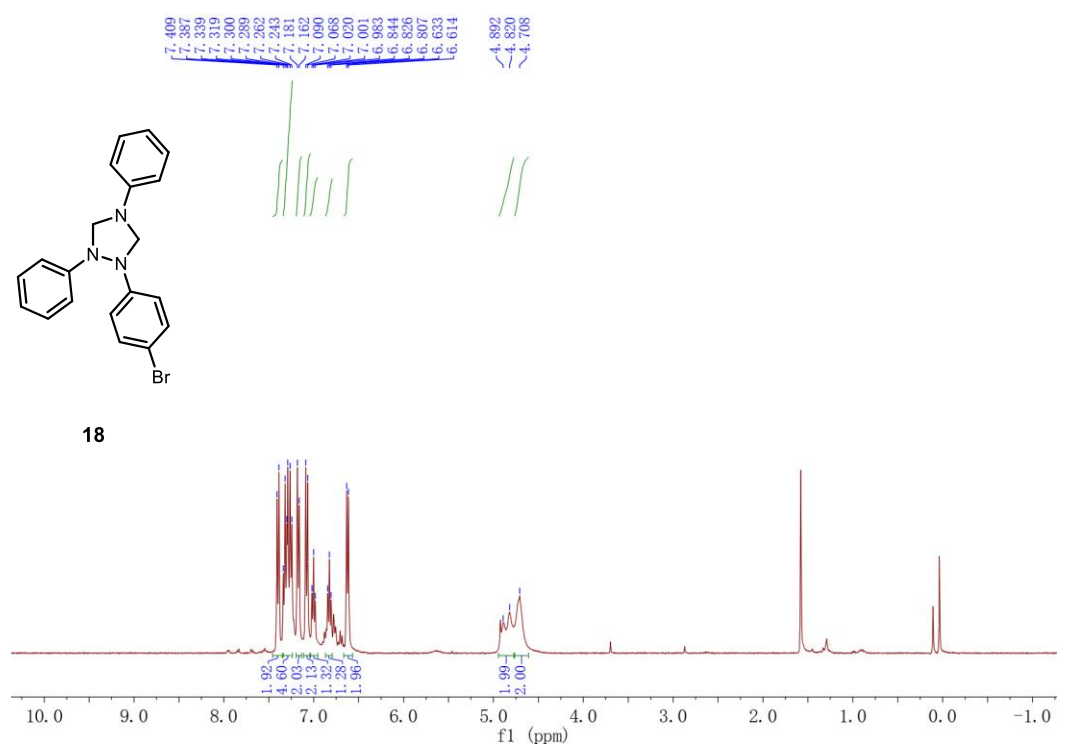

**<sup>13</sup>C NMR (101 MHz, CDCl<sub>3</sub>):**

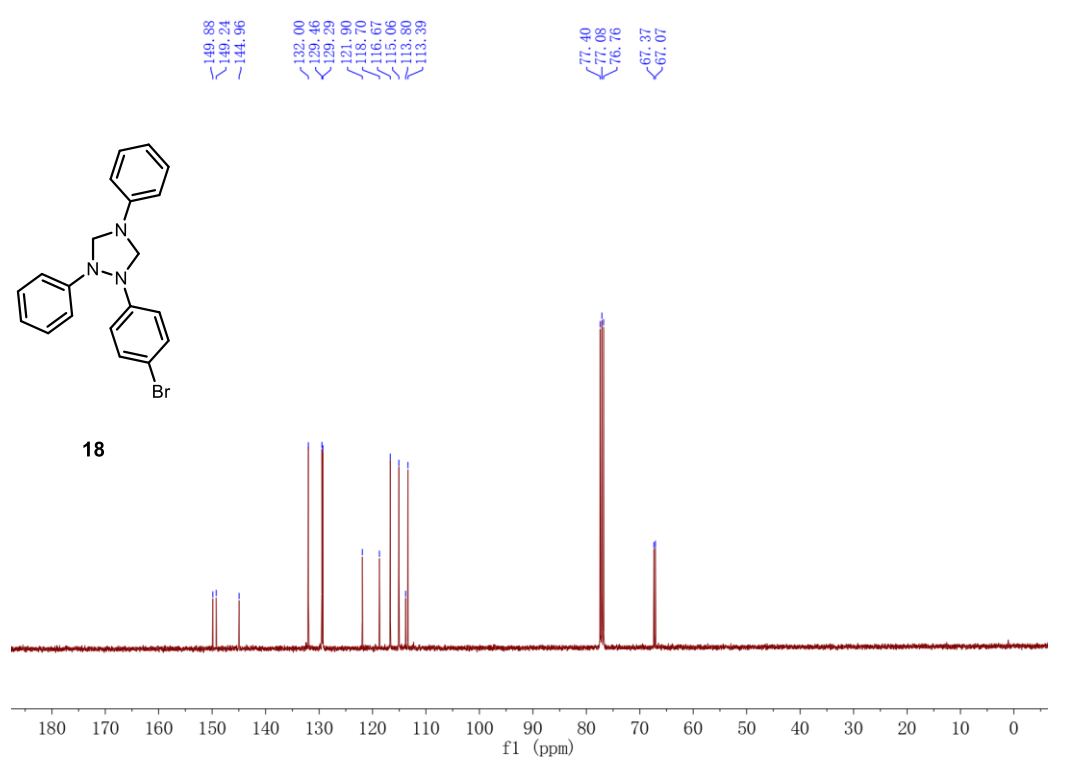

**<sup>1</sup>H NMR (400 MHz, CDCl<sub>3</sub>):**

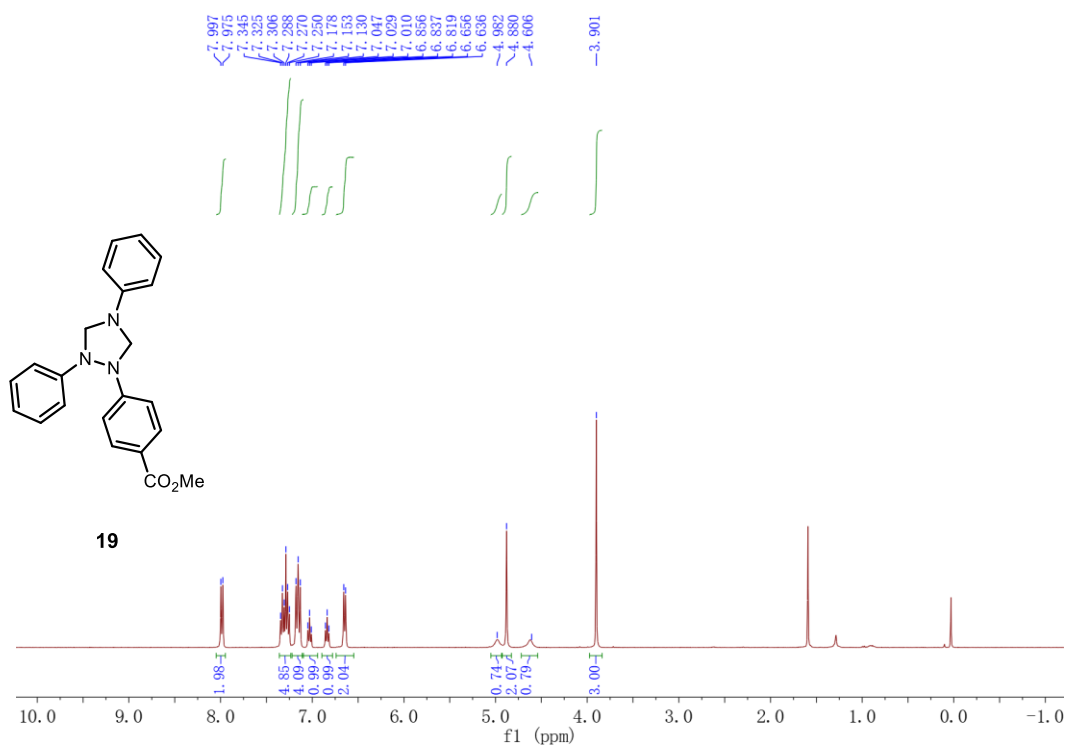

**<sup>13</sup>C NMR (101 MHz, CDCl<sub>3</sub>):**

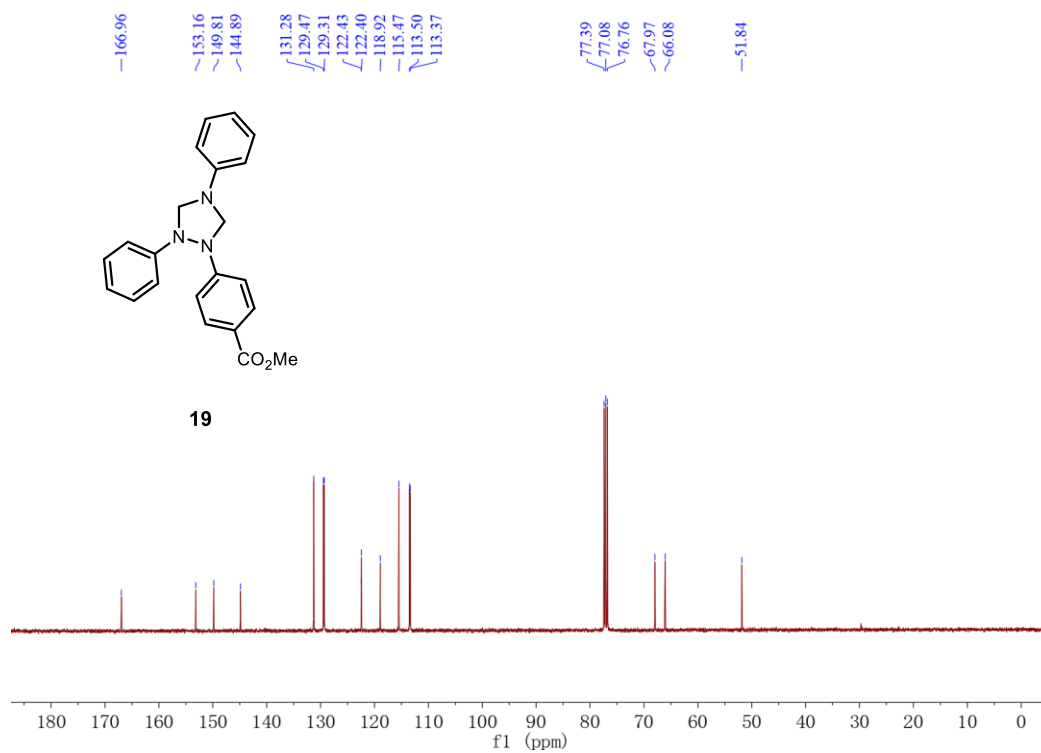

**<sup>1</sup>H NMR (400 MHz, CDCl<sub>3</sub>):**

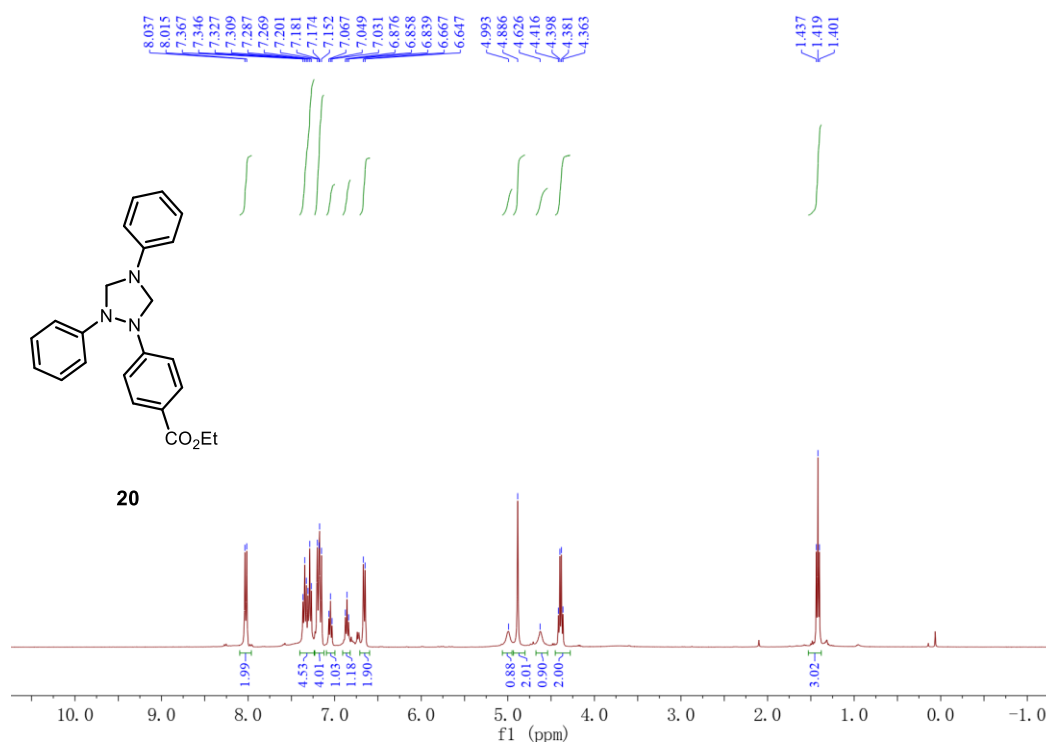

**<sup>13</sup>C NMR (101 MHz, CDCl<sub>3</sub>):**

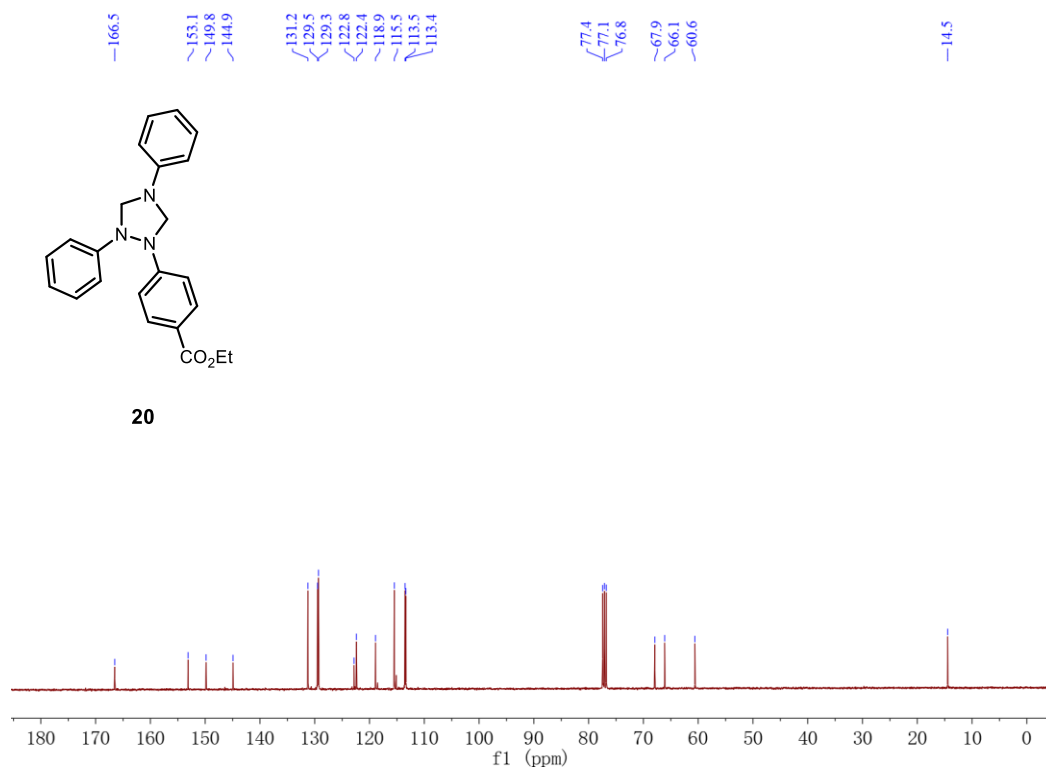

**<sup>1</sup>H NMR (400 MHz, CDCl<sub>3</sub>):**

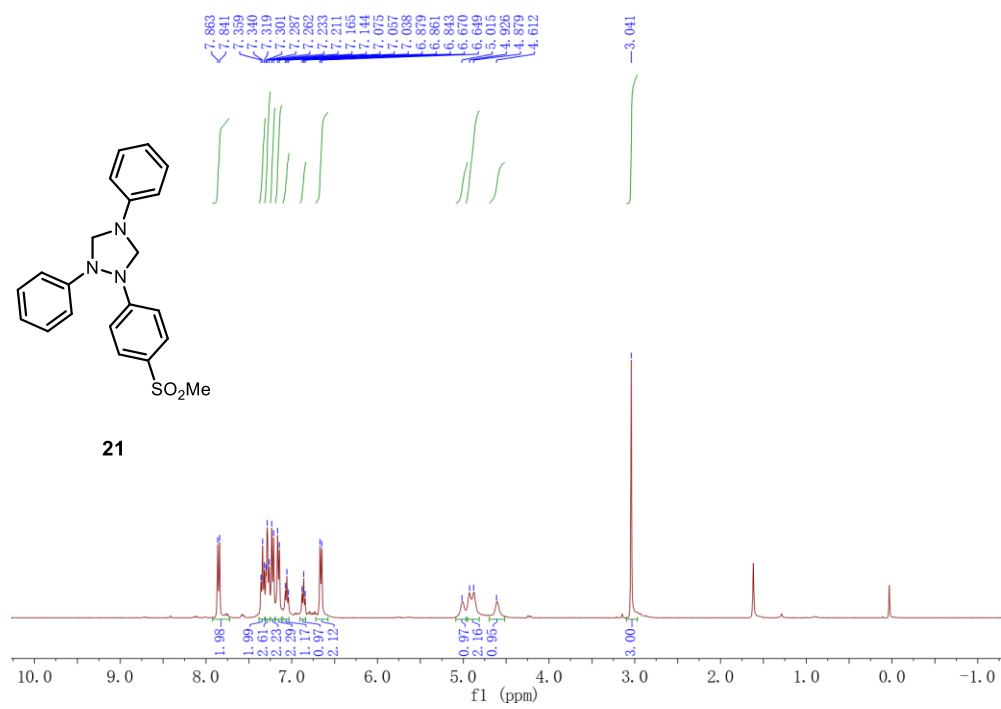

**<sup>13</sup>C NMR (101 MHz, CDCl<sub>3</sub>):**

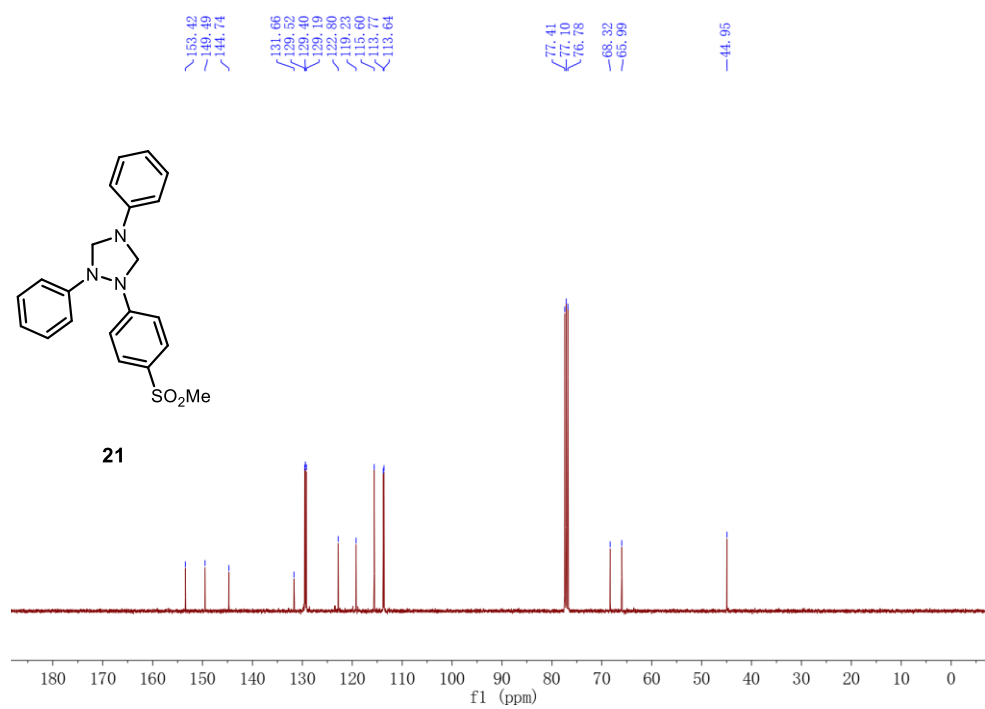

**<sup>1</sup>H NMR (400 MHz, CDCl<sub>3</sub>):**

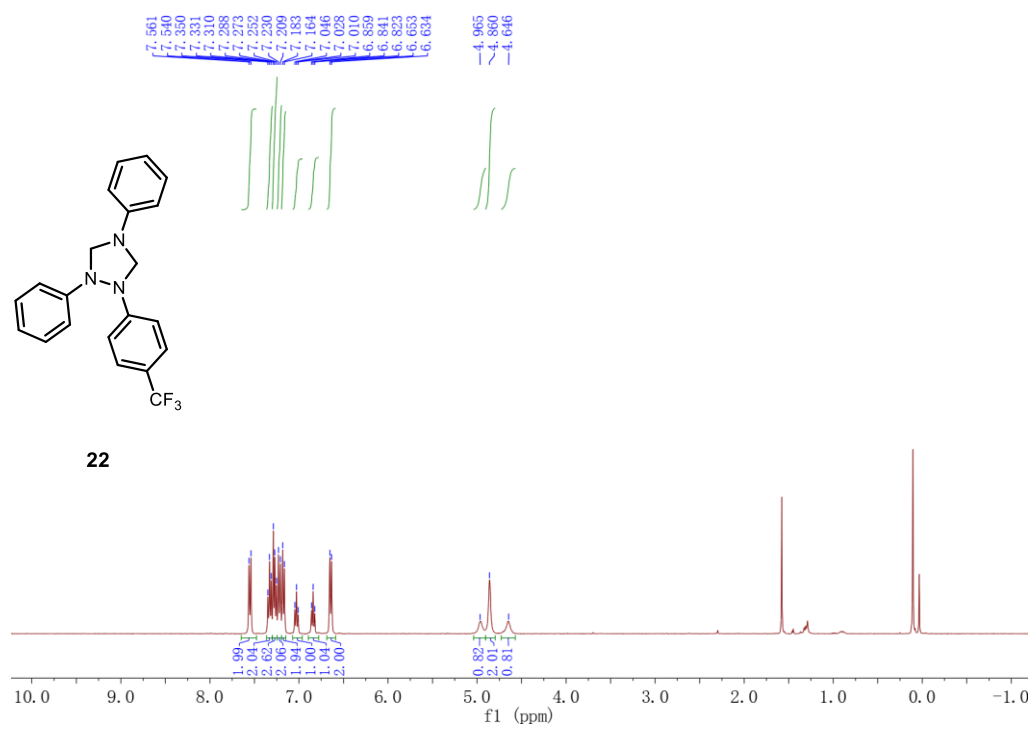

**<sup>13</sup>C NMR (101 MHz, CDCl<sub>3</sub>):**

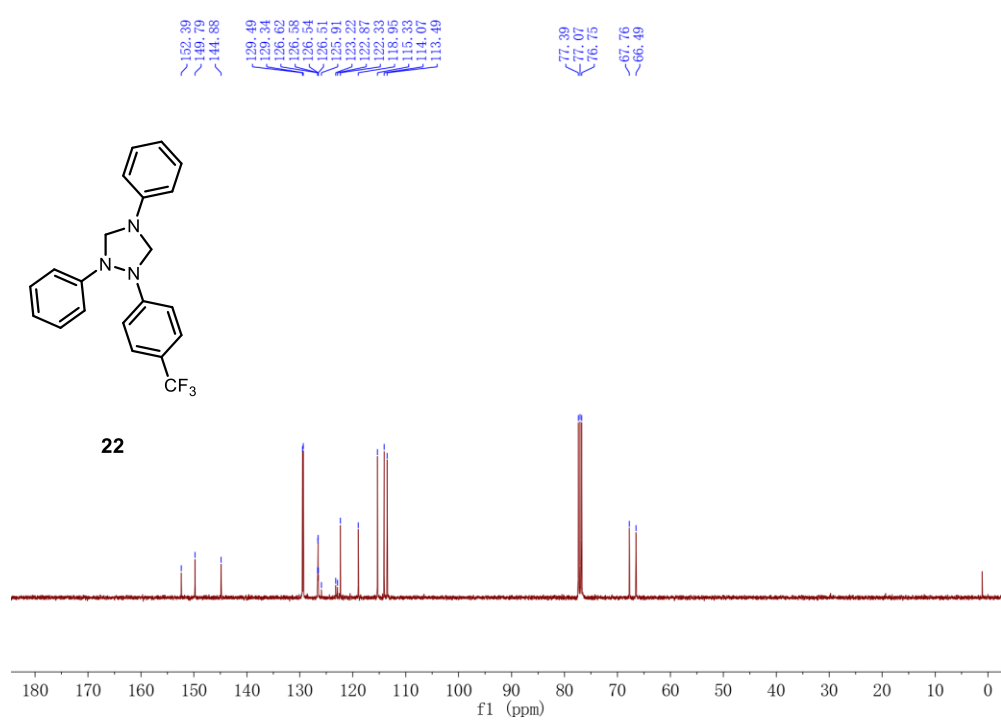

**<sup>1</sup>H NMR (400 MHz, CDCl<sub>3</sub>):**

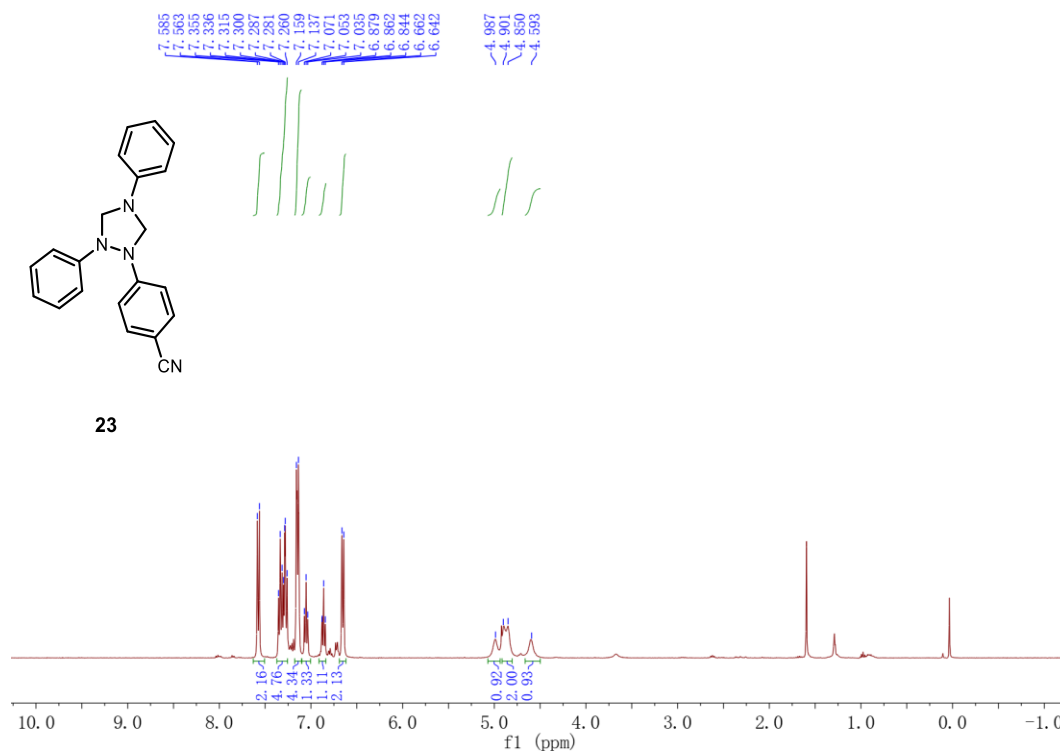

**<sup>13</sup>C NMR (101 MHz, CDCl<sub>3</sub>):**

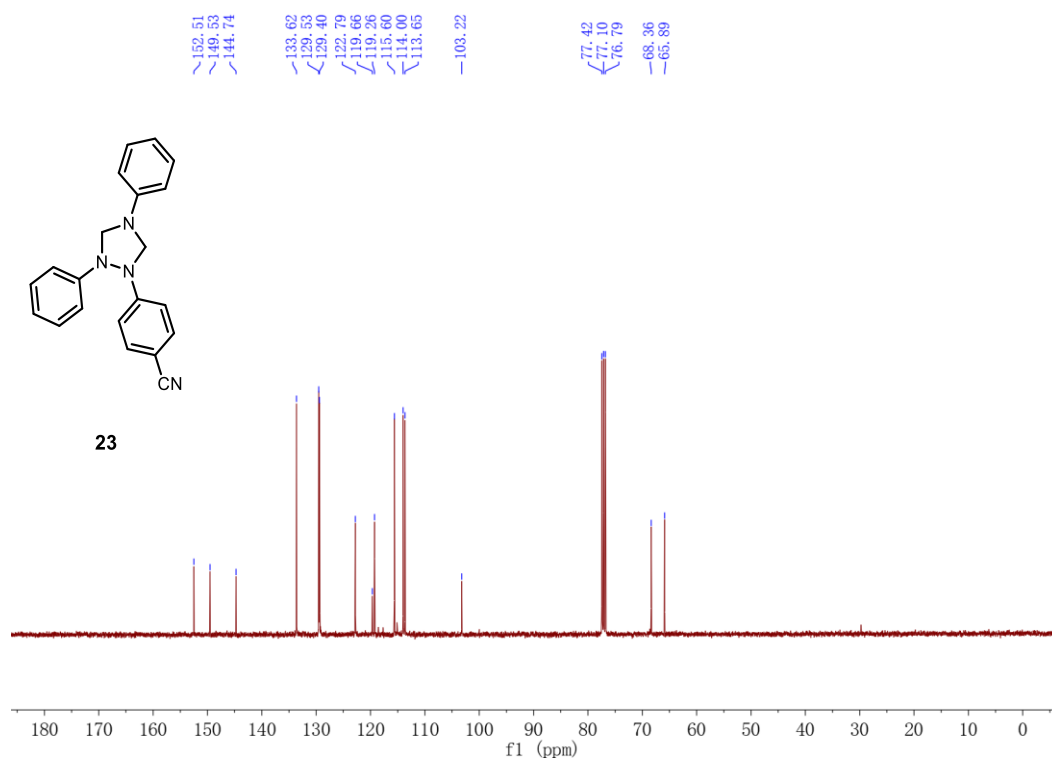

**<sup>1</sup>H NMR (400 MHz, CDCl<sub>3</sub>):**

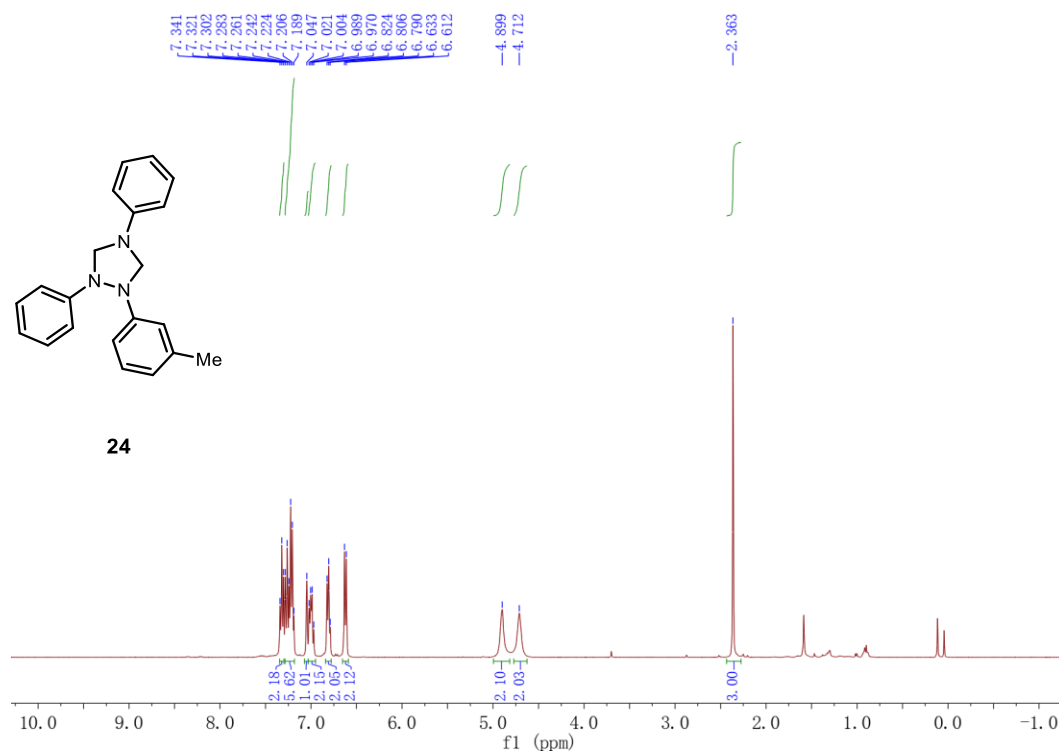

**<sup>13</sup>C NMR (101 MHz, CDCl<sub>3</sub>):**

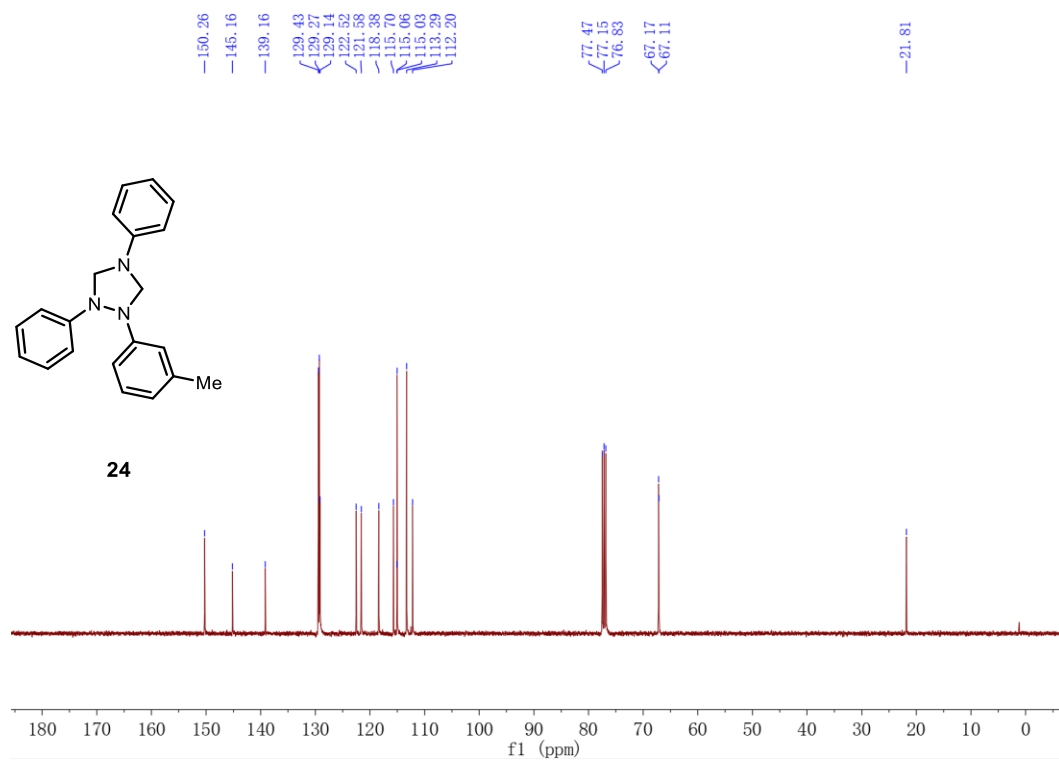

**<sup>1</sup>H NMR (400 MHz, CDCl<sub>3</sub>):**

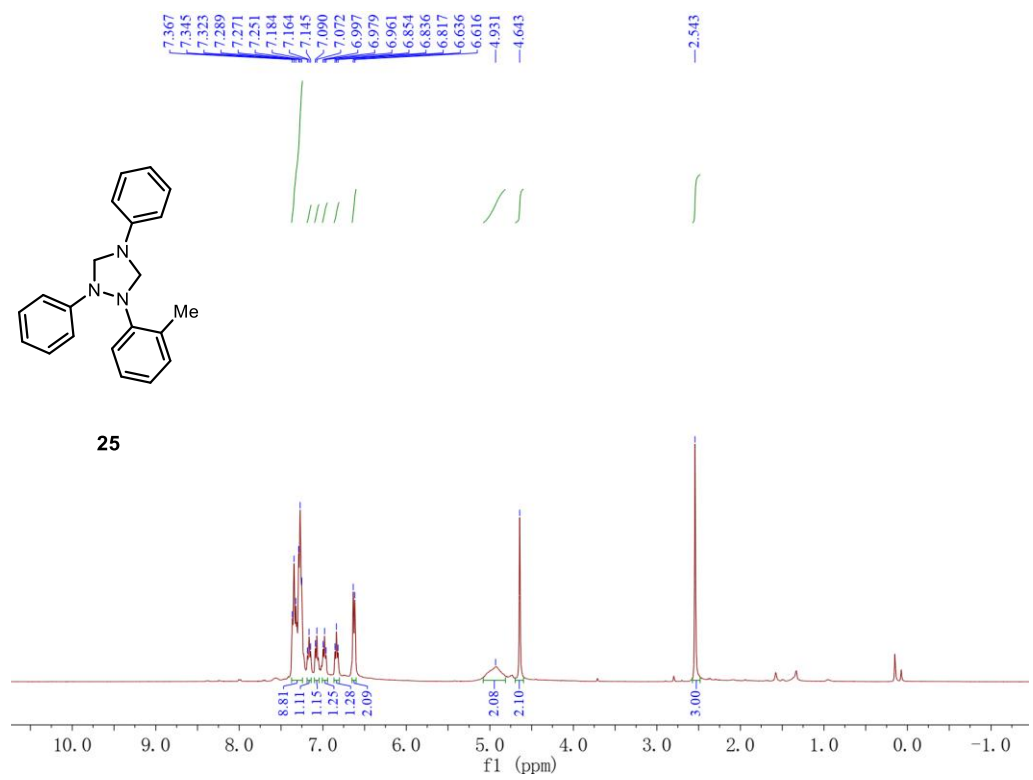

**<sup>13</sup>C NMR (101 MHz, CDCl<sub>3</sub>):**

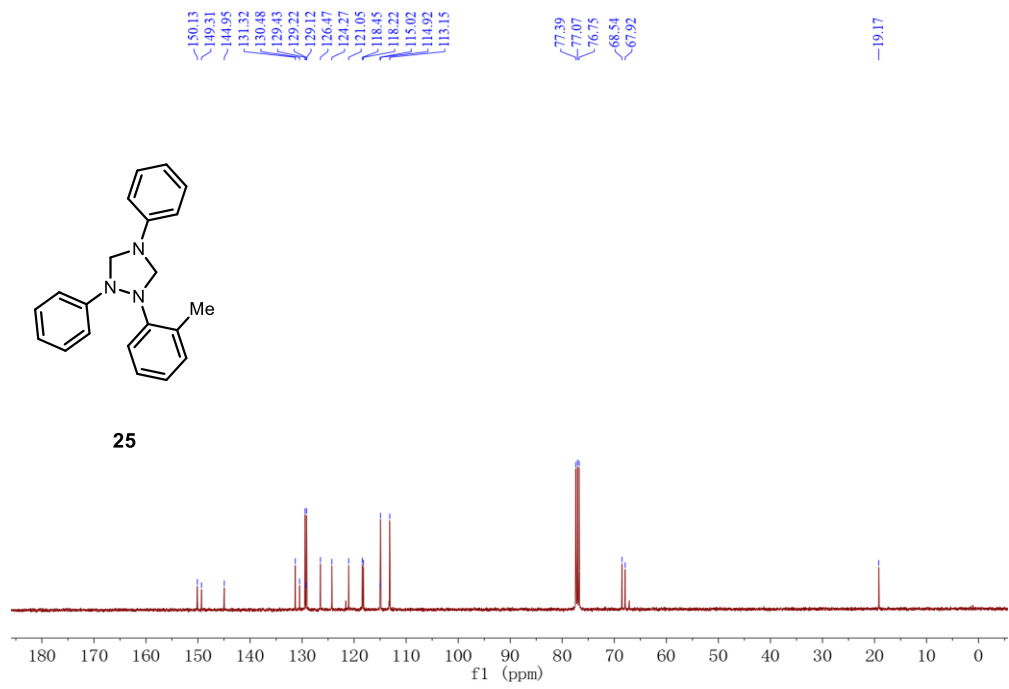

**<sup>1</sup>H NMR (400 MHz, CDCl<sub>3</sub>):**

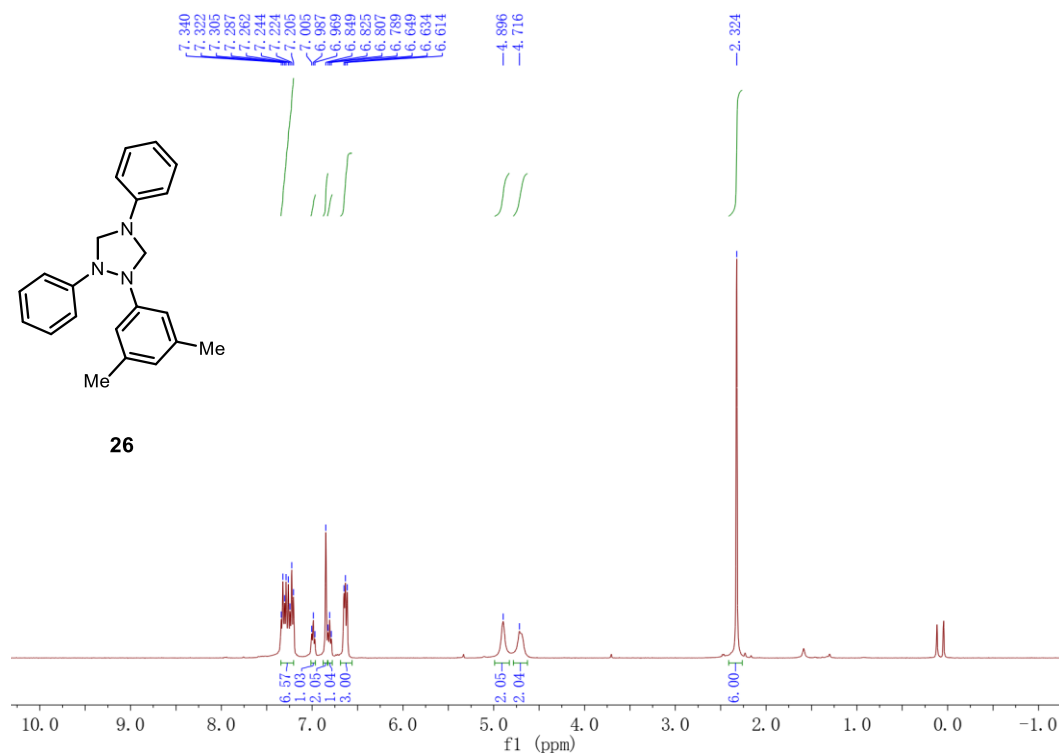

**<sup>13</sup>C NMR (101 MHz, CDCl<sub>3</sub>):**

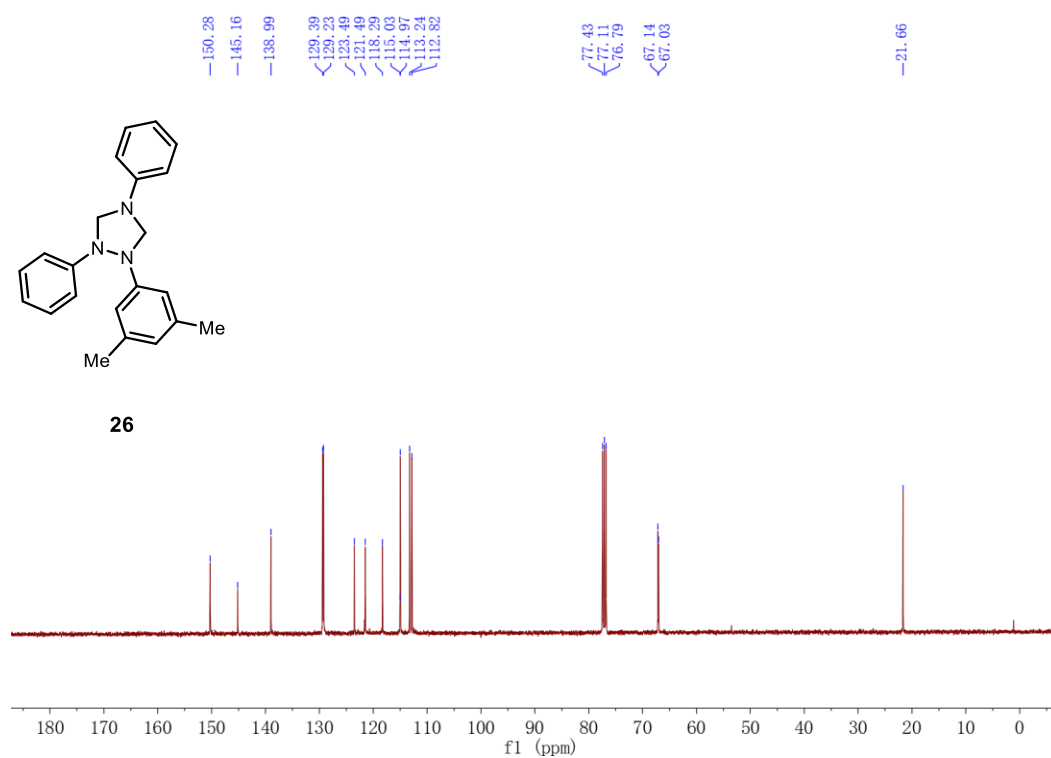

**<sup>1</sup>H NMR (400 MHz, CDCl<sub>3</sub>):**

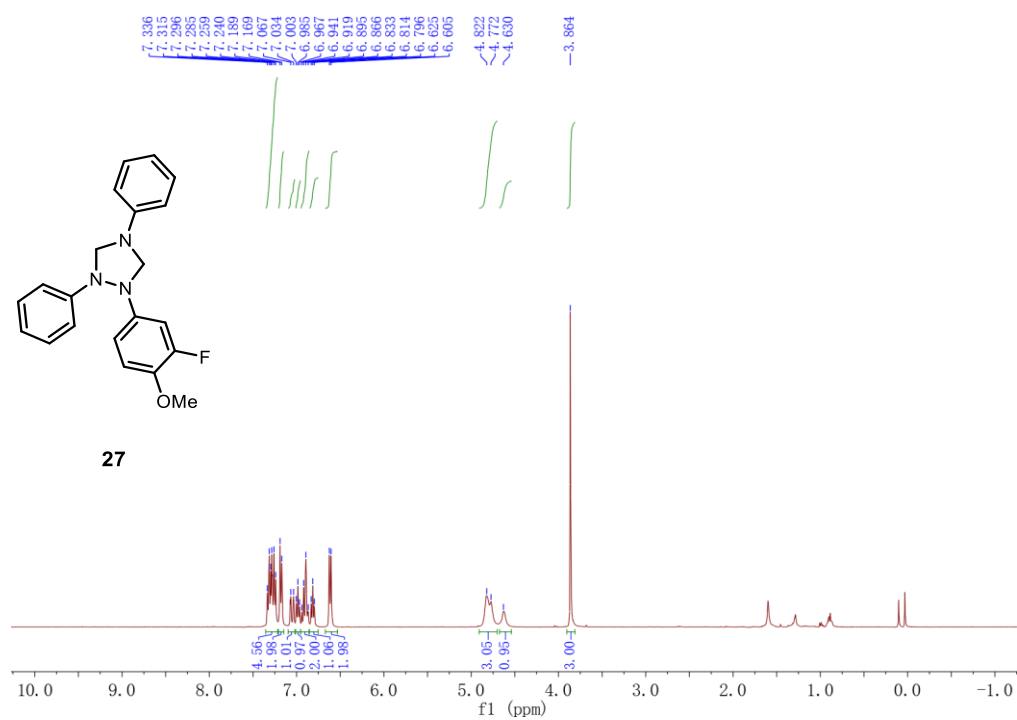

**<sup>13</sup>C NMR (101 MHz, CDCl<sub>3</sub>):**

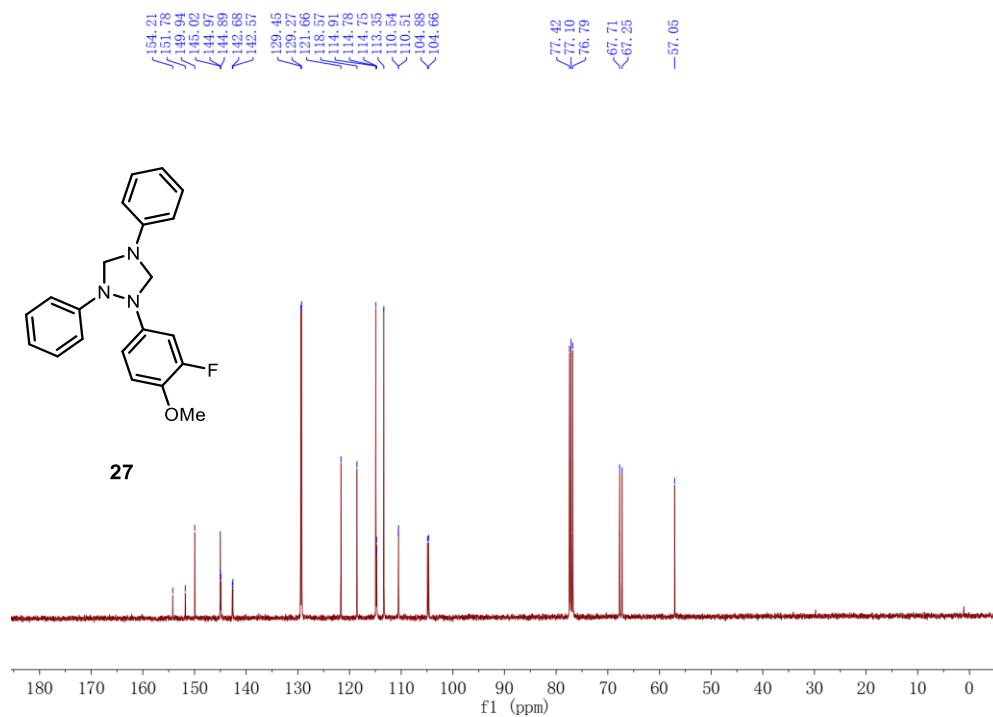

**<sup>1</sup>H NMR (400 MHz, CDCl<sub>3</sub>):**

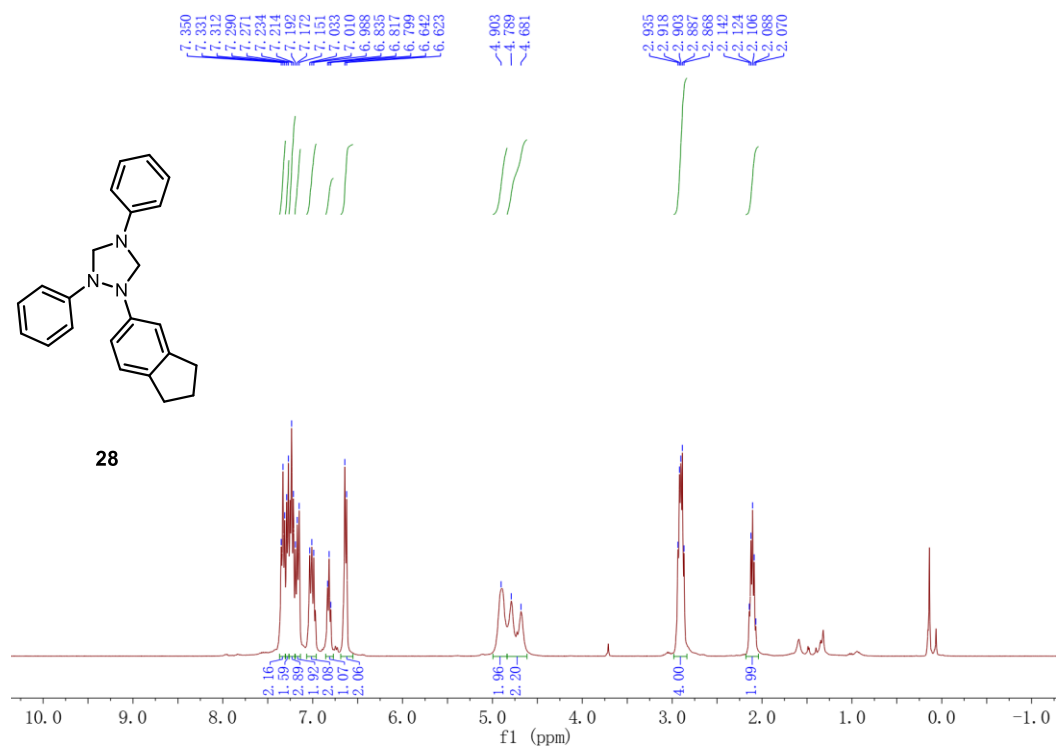

**<sup>13</sup>C NMR (101 MHz, CDCl<sub>3</sub>):**

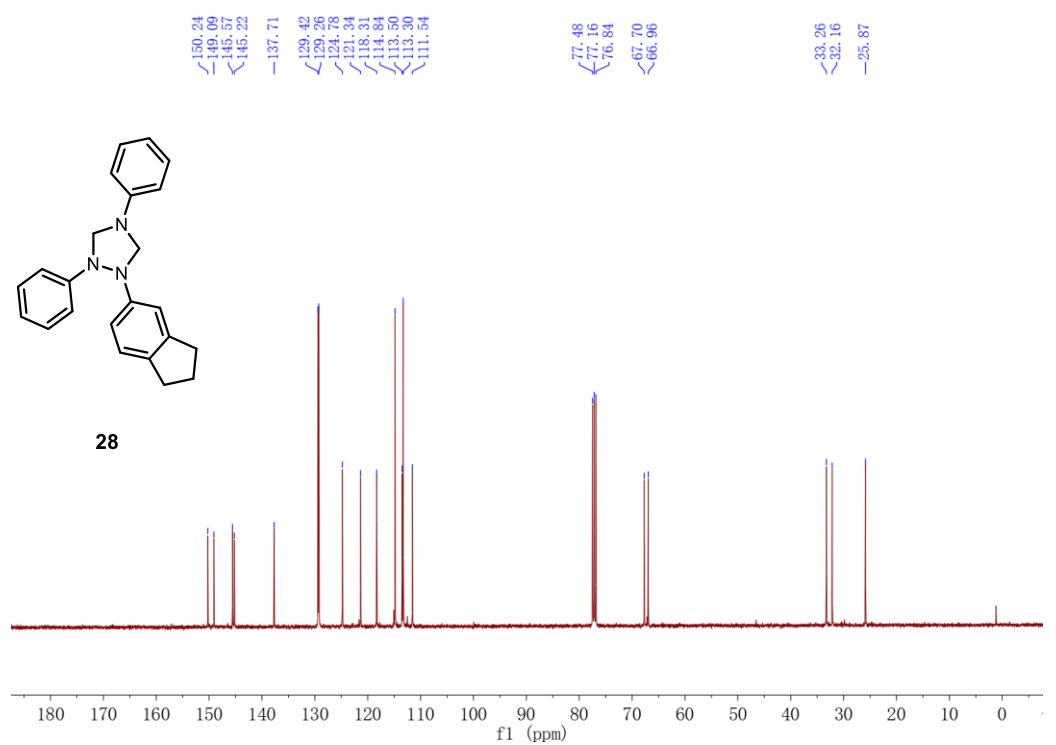



**<sup>1</sup>H NMR (400 MHz, CDCl<sub>3</sub>):**

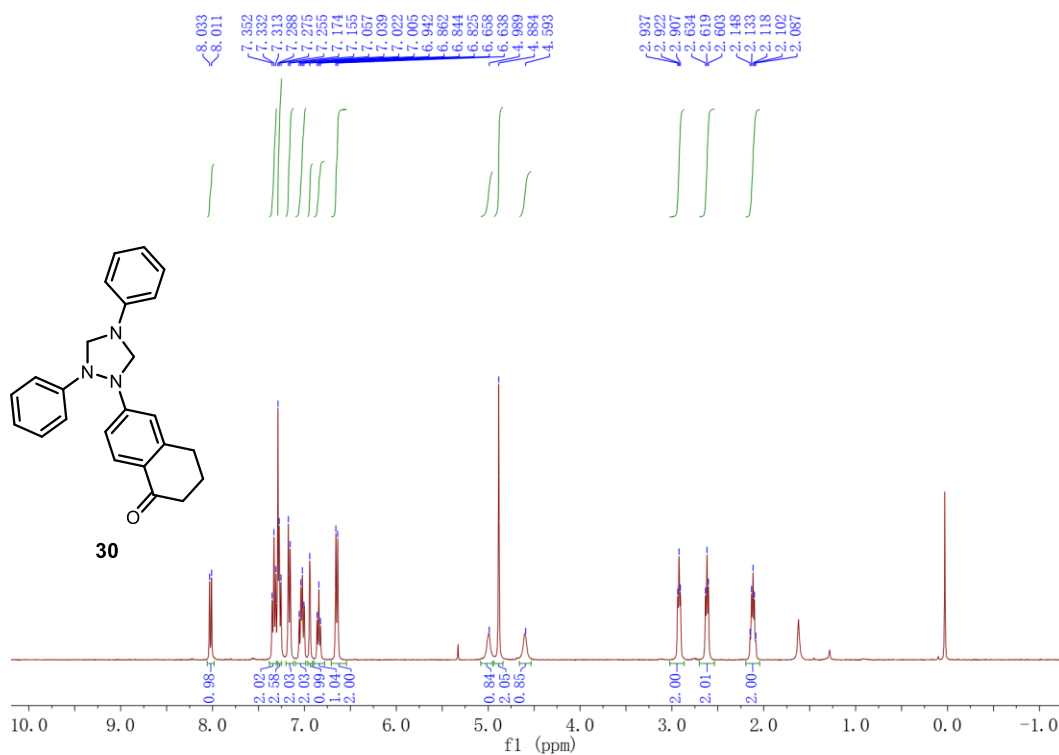

**<sup>13</sup>C NMR (101 MHz, CDCl<sub>3</sub>):**

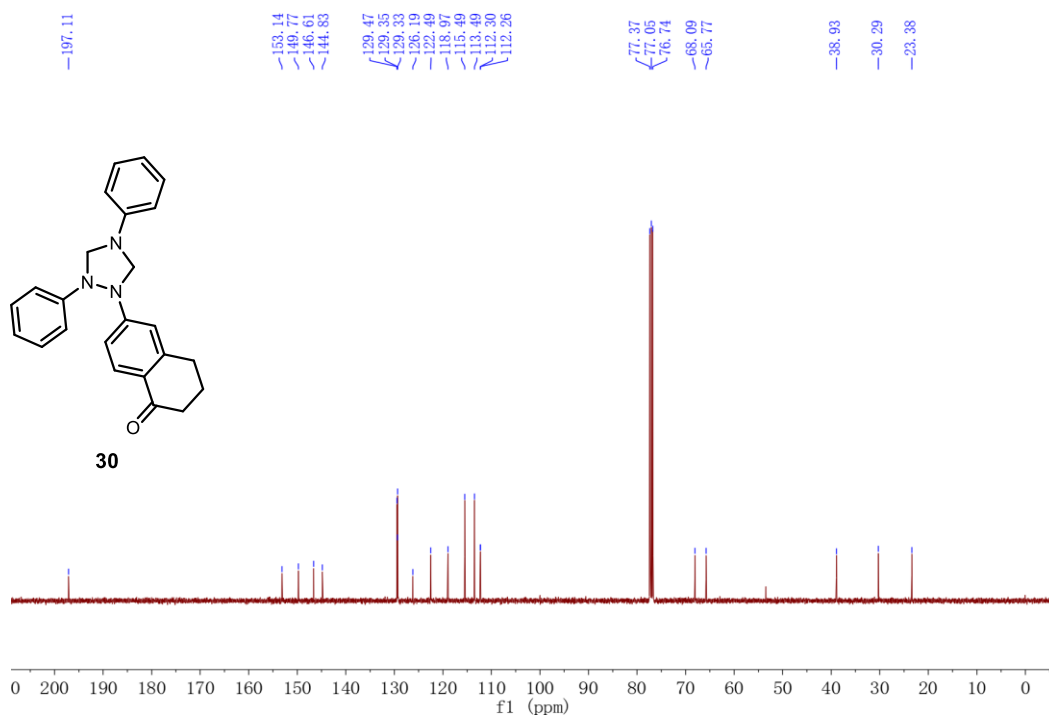



**<sup>1</sup>H NMR (400 MHz, CDCl<sub>3</sub>):**

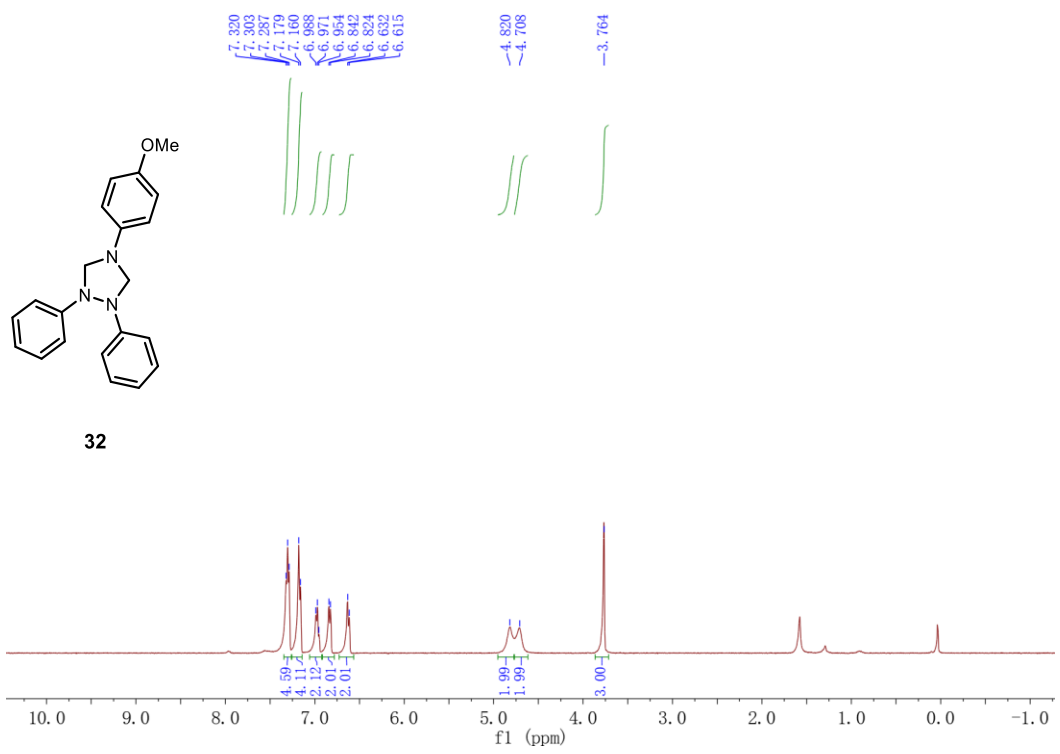

**<sup>13</sup>C NMR (101 MHz, CDCl<sub>3</sub>):**

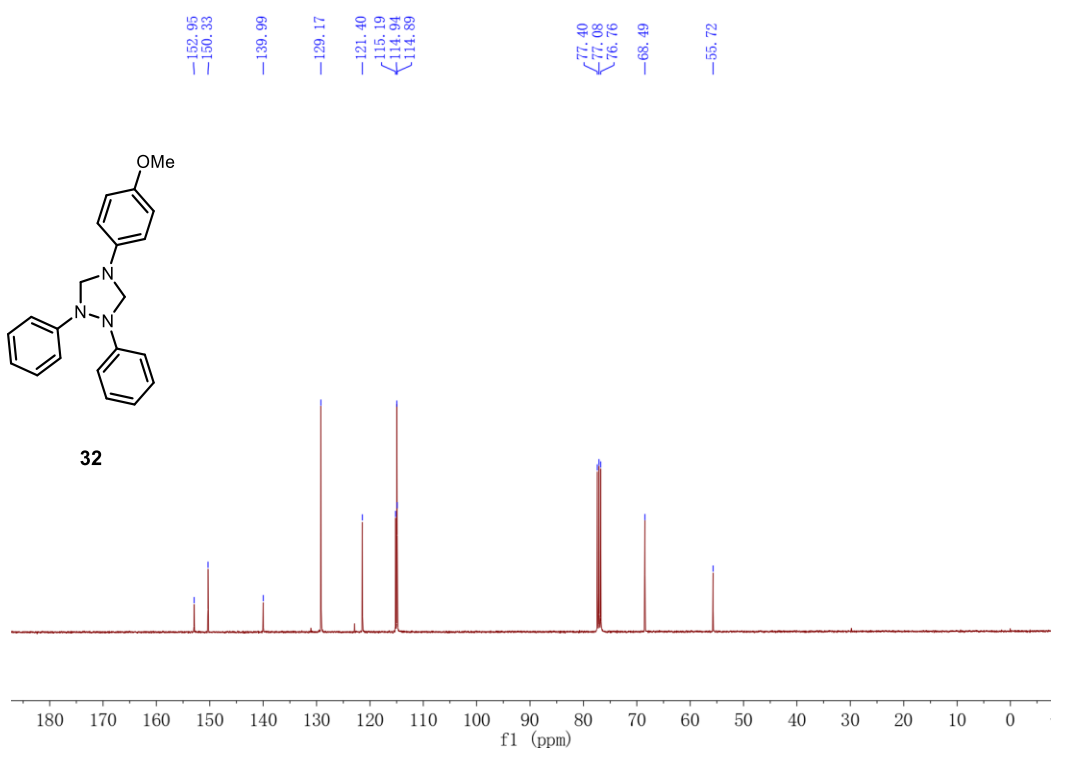

**<sup>1</sup>H NMR (400 MHz, CDCl<sub>3</sub>):**

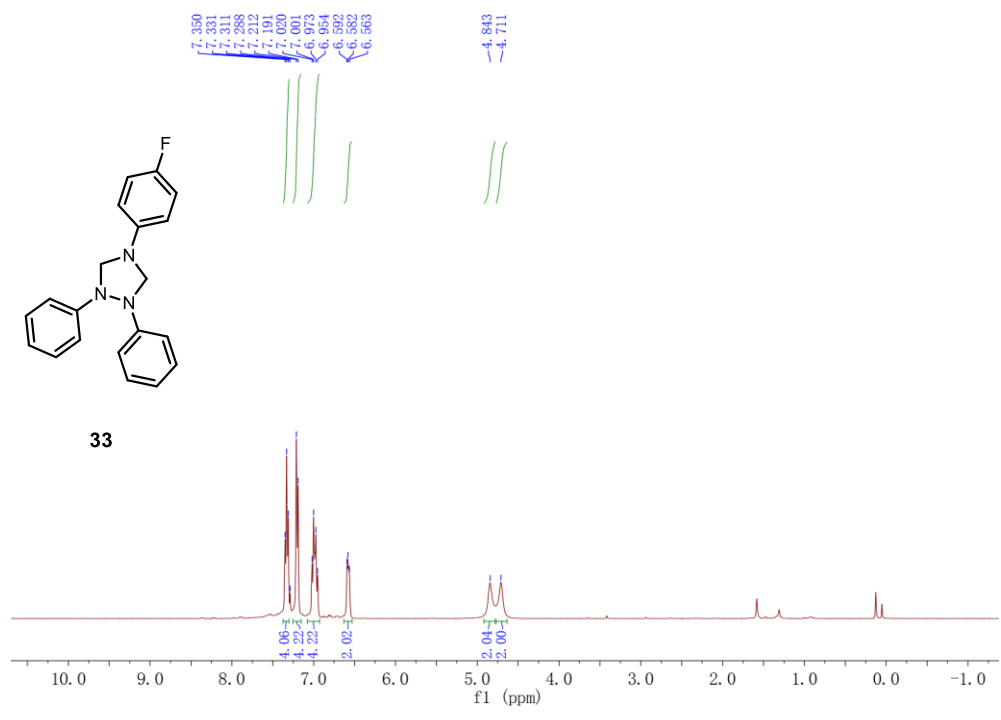

**<sup>13</sup>C NMR (101 MHz, CDCl<sub>3</sub>):**

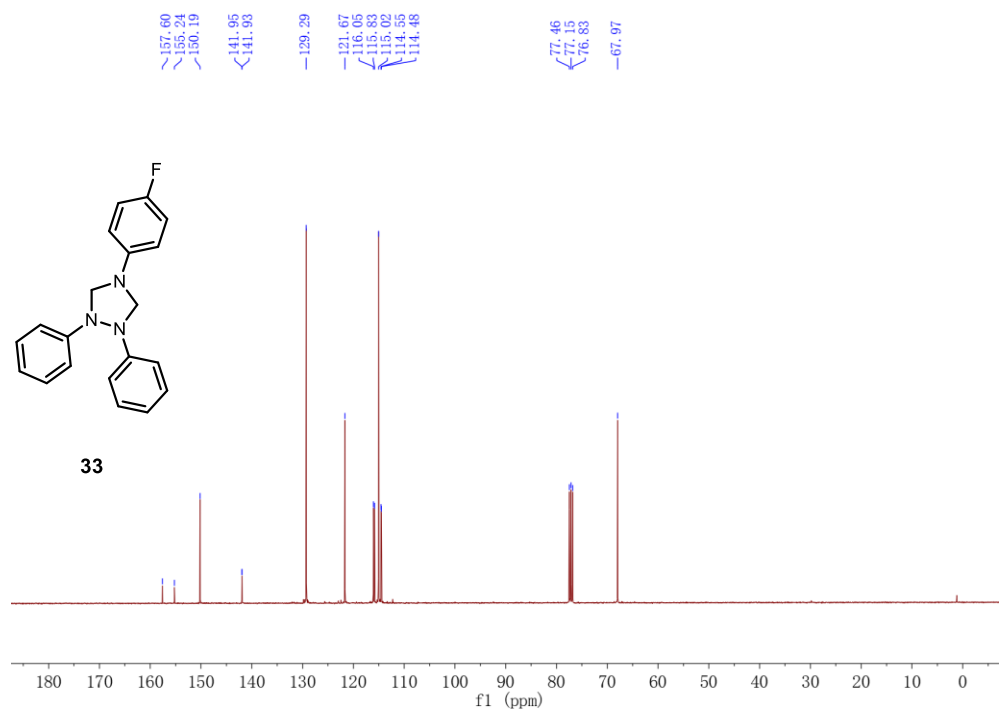

**<sup>1</sup>H NMR (400 MHz, CDCl<sub>3</sub>):**

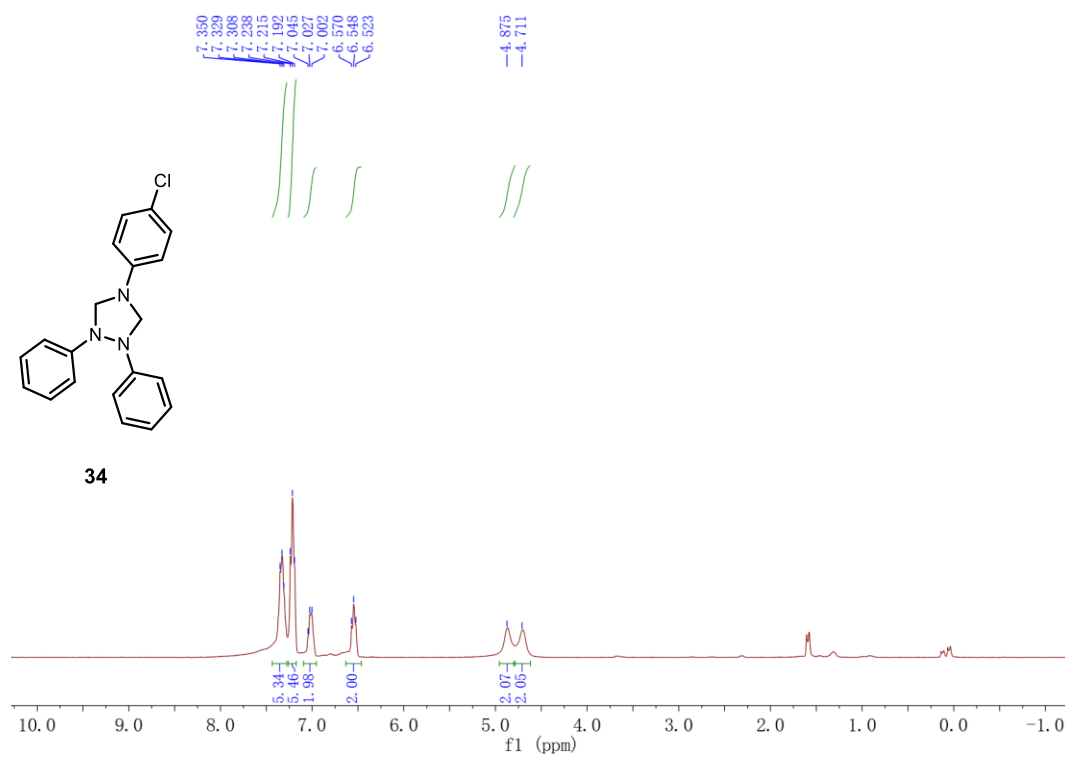

**<sup>13</sup>C NMR (101 MHz, CDCl<sub>3</sub>):**

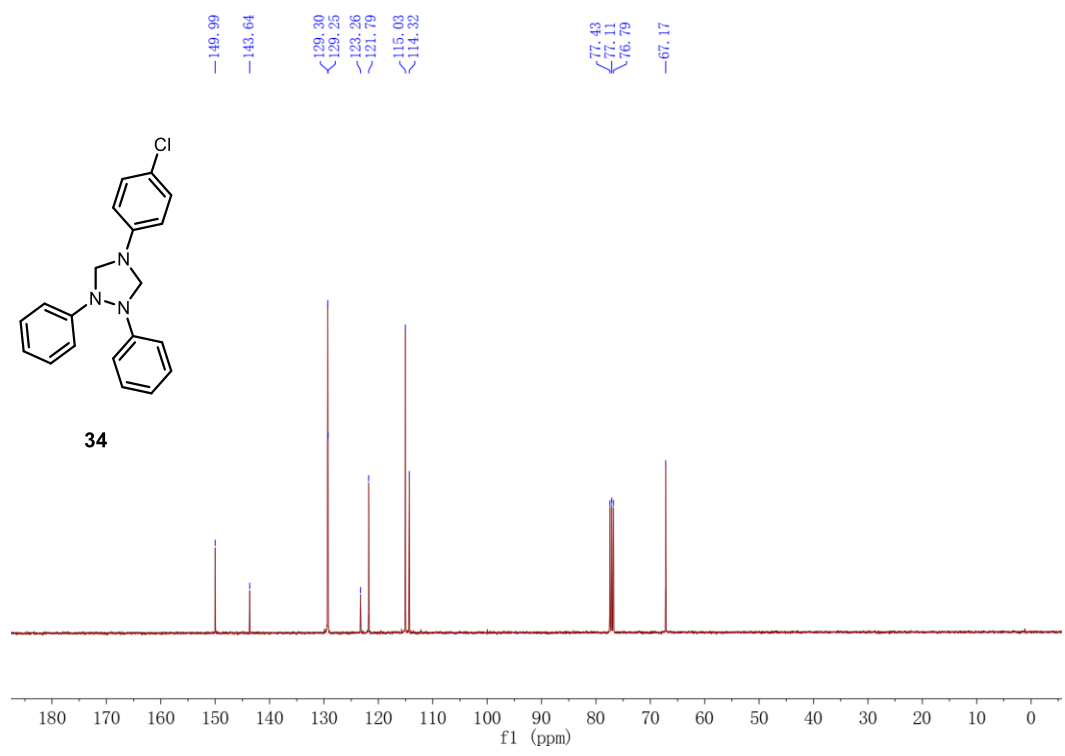

**<sup>1</sup>H NMR (400 MHz, CDCl<sub>3</sub>):**

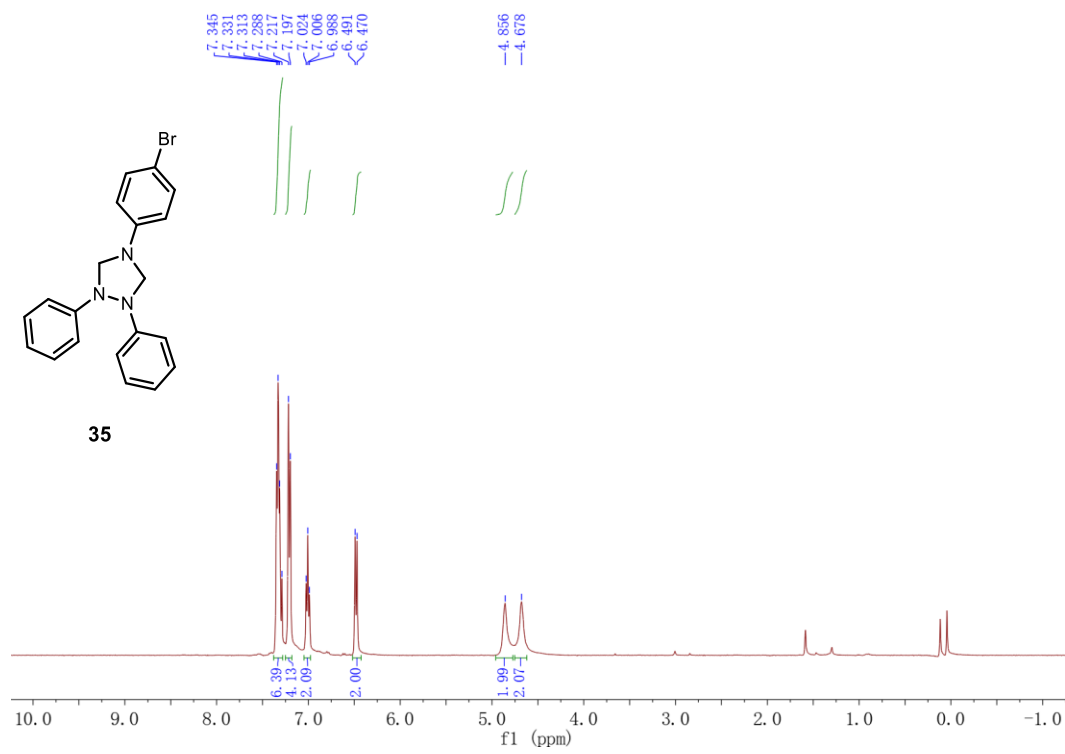

**<sup>13</sup>C NMR (101 MHz, CDCl<sub>3</sub>):**

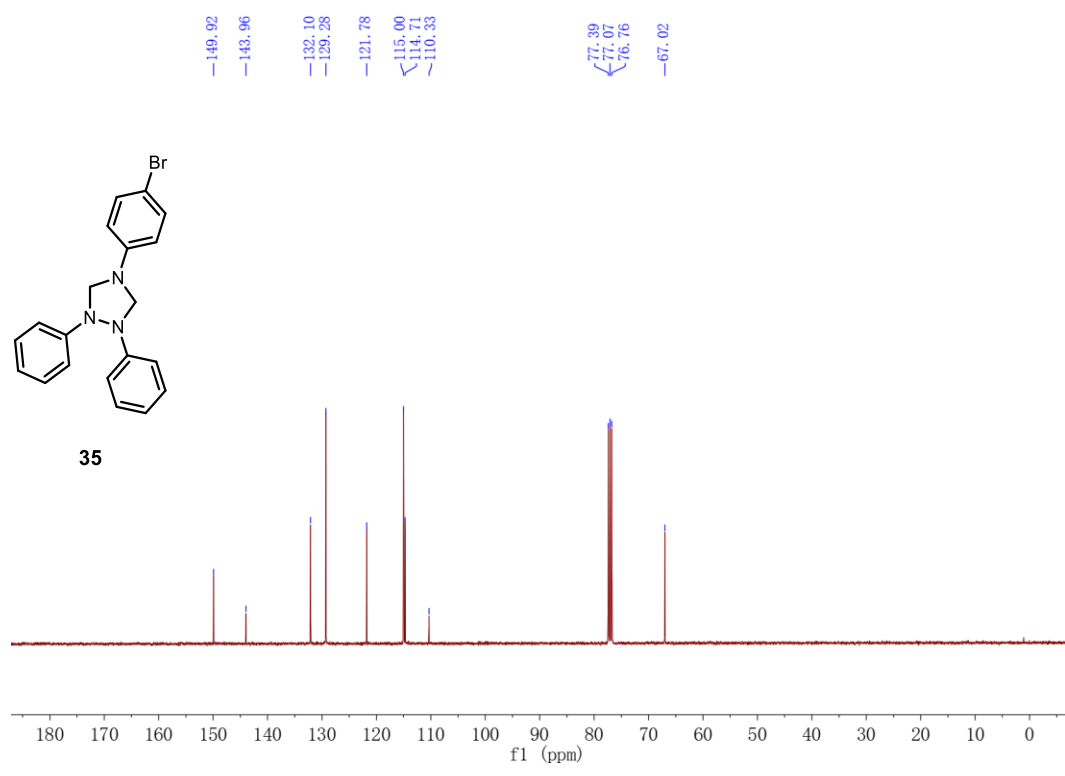

**<sup>1</sup>H NMR (400 MHz, CDCl<sub>3</sub>):**

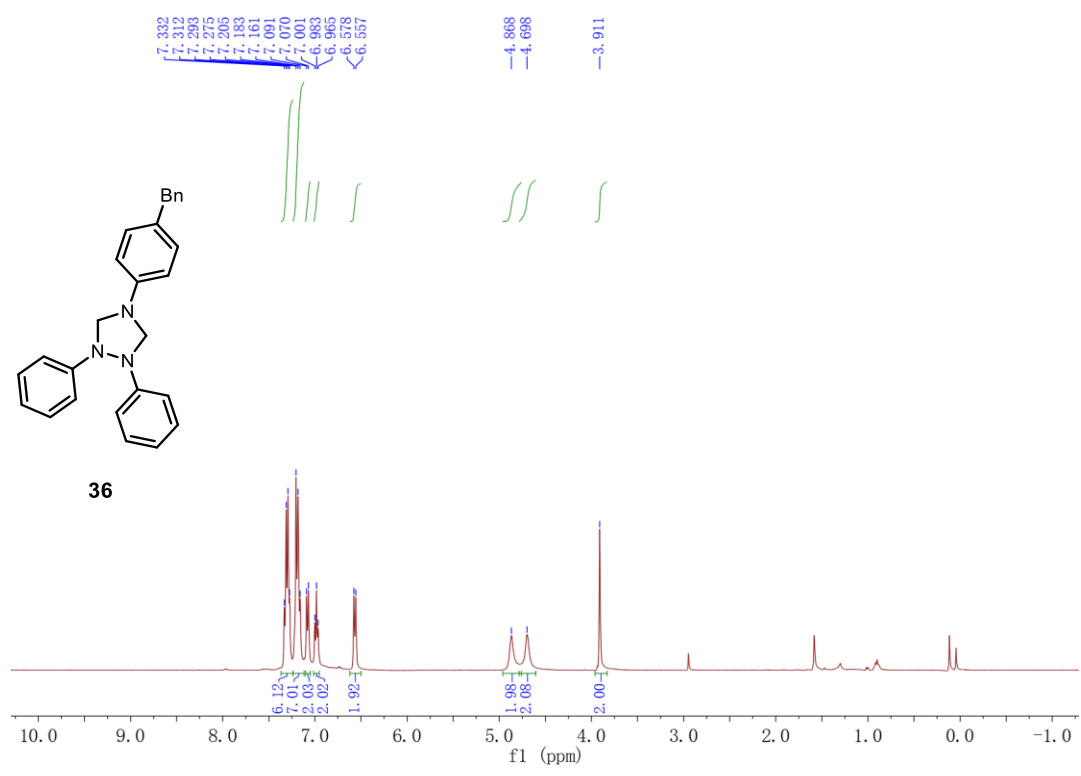

**<sup>13</sup>C NMR (101 MHz, CDCl<sub>3</sub>):**

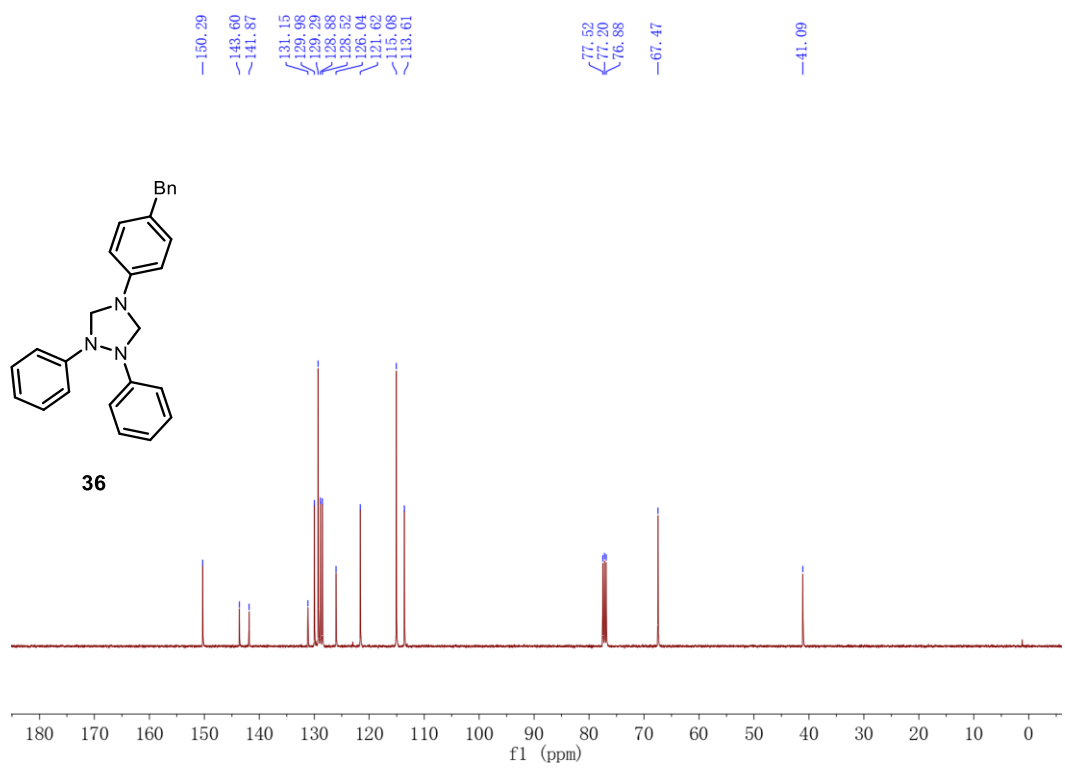

**<sup>1</sup>H NMR (400 MHz, CDCl<sub>3</sub>):**

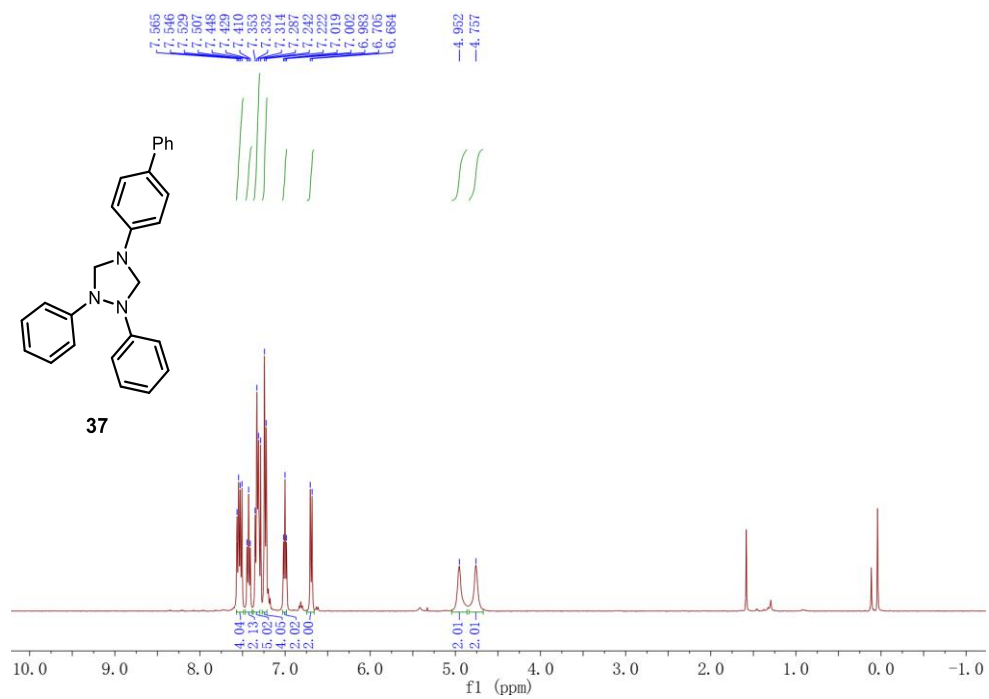

**<sup>13</sup>C NMR (101 MHz, CDCl<sub>3</sub>):**

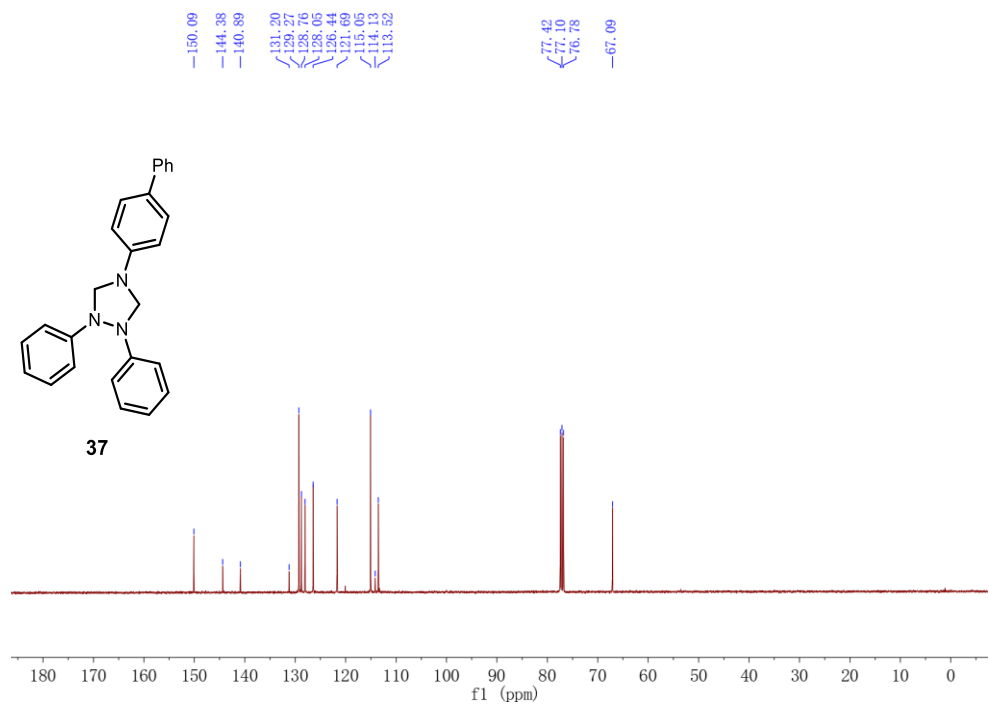

**<sup>1</sup>H NMR (400 MHz, CDCl<sub>3</sub>):**

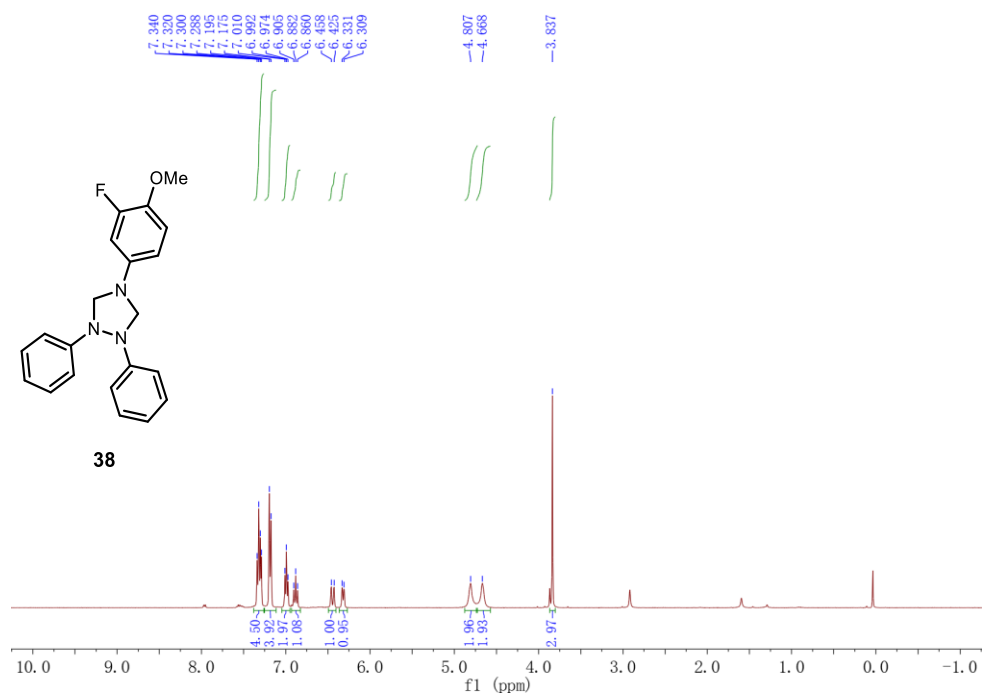

**<sup>13</sup>C NMR (101 MHz, CDCl<sub>3</sub>):**

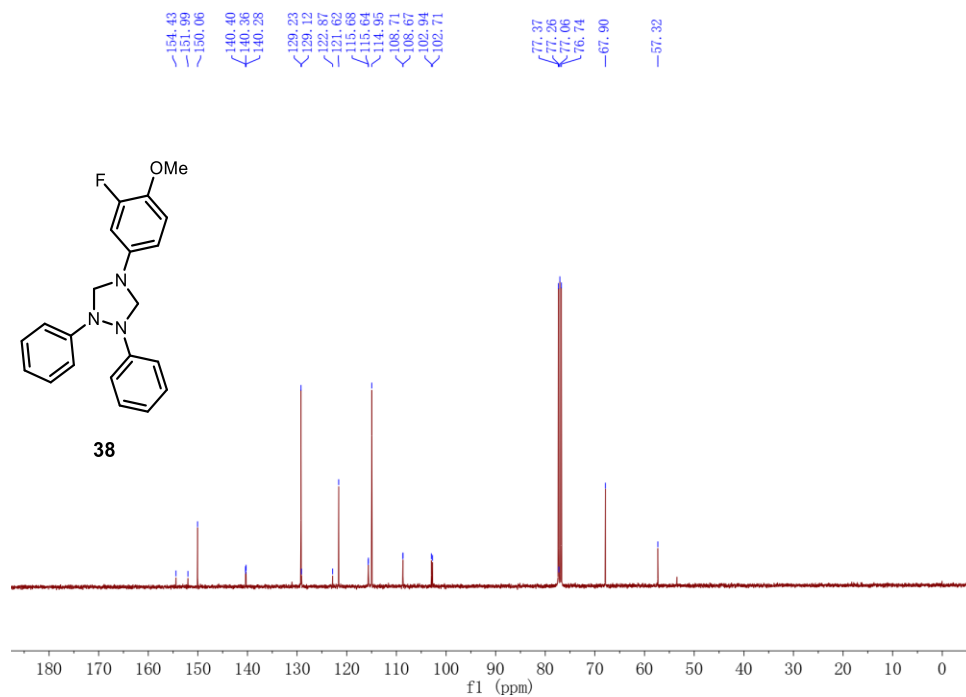

Supplement: d6ob00350h1.pdf [file d6ob00350h1.pdf]
